# Supplementary material for: Demography and homing behavior in the poorly-known Philippine flat-headed frog Barbourula busuangensis (Anura: Bombinatoridae)
Source: PeerJ. 2025 Jan 14;13:e18694. doi: 10.7717/peerj.18694 (PMC11740736; doi:10.7717/peerj.18694)
Supplement: Supplemental Information 11 — Date of collection and subsequent marking (y/m/d); genus and species name; transponder ID; recap (y/n); VIE color codes; time of collection; snout-to-vent length (SVL, mm); age (juvenile, subadult or adult); weight (g); sex (unknown/female); reproductive notes (gravid/not); transect where the individual was found; substrate where the individual was found; season (dry, transition or wet); and, weather of sampling day. [file peerj-13-18694-s011.xlsx]

## Sheet: Hoja1
Date (y/m/d)	Genus	Species	Transponder ID	RECAP	VIE	Time of collection	SVL (mm)	Age	Weight (g)	Sex	Reproductive notes	Transect	Substrate	Season	Weather
2022-04-03	Barbourula	busuangensis	0007D32A9B	No			31.6	Juvenile	3	Unknown	No	(A) 30-40m		Dry
2022-04-03	Barbourula	busuangensis	0007E54A85	No			44.1	Subadult	13	Unknown	No	(C) 130-140m		Dry
2022-04-03	Barbourula	busuangensis	0007E90138	No			43.4	Subadult	13	Unknown	No	(C) 200m		Dry
2022-04-03	Barbourula	busuangensis	0007D5DD5A	No		18.45	54.1	Adult	27	Unknown	No	(A) 10-20m		Dry
2022-04-03	Barbourula	busuangensis	0007D5FAE4	No			61.6	Adult	24.6	Unknown	No	(C) 160-170m		Dry
2022-04-03	Barbourula	busuangensis	0007E9E3CF	No			75.2	Adult	50	Female	Gravid	(A) 30-40m		Dry
2022-04-03	Barbourula	busuangensis	0007D5BB8E	No			80.04	Adult	65	Unknown	No	(C) 160-170m		Dry
2022-04-05	Barbourula	busuangensis	0007E4C1A4	No			34.3	Subadult	4	Unknown	No	(A) 80-90m	Margin pool	Dry	Rain
2022-04-05	Barbourula	busuangensis	0007E53D51	No			75.9	Adult	51	Unknown	No	(B) 0-10m	Big pool	Dry	Rain
2022-04-05	Barbourula	busuangensis	0007D3E099	No			56.4	Adult	17.7	Unknown	No	(C) 150-160m	Big pool	Dry	Rain
2022-04-05	Barbourula	busuangensis	0007D34CD1	No			51.2	Adult	16.5	Female	Gravid	(C) 170-180m	Small pool	Dry	Rain
2022-04-05	Barbourula	busuangensis	0007E547C4	No			75.6	Adult	48	Unknown	No	(C) 180m	Margin pool	Dry	Rain
2022-04-05	Barbourula	busuangensis	0007D3A0D5	No			84.2	Adult	62	Unknown	No	(C) 210-220m	On rock	Dry	Rain
2022-04-05	Barbourula	busuangensis	0007E534CE	No			69.1	Adult	40	Unknown	No	(C) 220m	Big pool	Dry	Rain
2022-04-06	Barbourula	busuangensis	0007D5FC99	No			60.4	Adult	29	Unknown	No	SR: 12º12’12”N 119º55’9”E	Rock cave	Dry
2022-04-06	Barbourula	busuangensis	0007D5E8C8	No			66.4	Adult	36	Unknown	No	SR: 12º12’12”N 119º55’12”E	Entrance of rock	Dry
2022-04-06	Barbourula	busuangensis	0007E4C965	No			71.2	Adult	54.5	Female	Gravid	SR: 12º12’12”N 119º55’12”E	Entrance of rock	Dry
2022-04-06	Barbourula	busuangensis	0007D5D7F0	No			43.5	Subadult	12	Unknown	No	SR: 12º12’13”N 119º55’14”E	Rock cave	Dry
2022-04-06	Barbourula	busuangensis	0007D3DE9B	No			73.3	Adult	48	Female	Gravid	SR: 12º12’13”N 119º55’14”E	Rock cave	Dry
2022-04-06	Barbourula	busuangensis	0007E4C753	No			66.9	Adult	40	Unknown	No	SR: 12º12’14”N 119º55’14”E	On rock	Dry
2022-04-06	Barbourula	busuangensis	0007D2B86F	No			49.4	Subadult	18	Unknown	No	SR: 12º12’15”N 119º55’14”E	Margin pool	Dry
2022-04-06	Barbourula	busuangensis	0007D3976C	No			81.6	Adult	67	Female	Gravid	SR: 12º12’17”N 119º55’15”E	Big pool	Dry
2022-04-06	Barbourula	busuangensis	0007D3927C	No			86.1	Adult	77	Unknown	No	SR: 12º12’18”N 119º55’16”E	Big pool	Dry
2022-04-06	Barbourula	busuangensis	0007D60B72	No			86.1	Adult	86	Unknown	No	SR: 12º12’19”N 119º55’16”E	Big pool	Dry
2022-04-06	Barbourula	busuangensis	0007D5E05A	No			85.2	Adult	78	Female	Gravid	SR: 12º12’19”N 119º55’16”E	Big pool	Dry
2022-04-12	Barbourula	busuangensis		No			2.8	Juvenile	2	Unknown	No	Bulalacao falls	On rock	Dry	Rain
2022-04-12	Barbourula	busuangensis		No			84.6	Adult	75	Unknown	No	Bulalacao falls	Entrance of rock	Dry	Rain
2022-04-12	Barbourula	busuangensis		No			45.3	Subadult	13	Unknown	No	Bulalacao falls	Entrance of rock	Dry	Rain
2022-04-12	Barbourula	busuangensis		No			46.9	Subadult	17	Unknown	No	Bulalacao falls	Rock cave	Dry	Rain
2022-04-15	Barbourula	busuangensis		No			79.7	Adult	55	Female	Gravid	Salakot falls	Margin pool	Dry
2022-04-15	Barbourula	busuangensis		No			73.8	Adult	37	Female	Gravid	Salakot falls	Rock cave	Dry
2022-04-15	Barbourula	busuangensis		No			38.4	Subadult	6	Unknown	No	Salakot falls	Margin pool	Dry
2022-04-15	Barbourula	busuangensis		No			40.5	Subadult	7	Unknown	No	Salakot falls	Big pool	Dry
2022-04-15	Barbourula	busuangensis		No			80.8	Adult	53	Female	Gravid	Salakot falls	Margin pool	Dry
2022-04-15	Barbourula	busuangensis		No			44.1	Subadult	23	Unknown	No	Banong bridge	On rock	Dry
2022-04-15	Barbourula	busuangensis		No			35.4	Subadult	4	Unknown	No	Banong bridge	On rock	Dry
2022-04-16	Barbourula	busuangensis		No			22	Juvenile	3	Unknown	No	Simpokan falls	Margin pool	Dry
2022-04-16	Barbourula	busuangensis		No			76.9	Adult	48	Female	Gravid	Simpokan falls	Entrance of rock	Dry
2022-04-21	Barbourula	busuangensis	0007D5DD5A	YES		19:05:00	55.1	Adult	27	Unknown	No	(A) 10-20m	Small pool	Dry
2022-04-21	Barbourula	busuangensis	0007D5CFC1	No		19:15:00	71.6	Adult	56	Female	Gravid	(A) 90m	Margin pool	Dry
2022-04-21	Barbourula	busuangensis	0007D5DA59	No		19:30:00	62.5	Adult	31	Unknown	No	(B) 90m	Margin pool	Dry
2022-04-21	Barbourula	busuangensis	0007D33AEC	No		19:35:00	49.1	Subadult	17	Unknown	No	(C) 10m	On rock	Dry
2022-04-21	Barbourula	busuangensis	0007D2E5C7	No		19:37:00	56.2	Adult	31.5	Unknown	No	(C) 10-20m	On rock	Dry
2022-04-21	Barbourula	busuangensis	0007D33806	No		19:39:00	81	Adult	62	Unknown	No	(C) 20m	Entrance rock	Dry
2022-04-21	Barbourula	busuangensis	0007D3972C	No		19:43:00	69.5	Adult	47	Unknown	No	(C) 30-40m	Rock cave	Dry
2022-04-21	Barbourula	busuangensis	0007D5EDF1	No		20:00:00	68.1	Adult	38	Unknown	No	(C) 110m	Small pool	Dry
2022-04-21	Barbourula	busuangensis	0007D5D2D3	No		20:00:00	82.5	Adult	65	Unknown	No	(C) 110m	Small pool	Dry
2022-04-21	Barbourula	busuangensis	0007D33339	No		20:04:00	55.1	Adult	21.5	Unknown	No	(C) 130-140m	Rock cave	Dry
2022-04-21	Barbourula	busuangensis	0007D2BC83	No		20:07:00	72.4	Adult	44	Unknown	No	(C) 140m	Rock cave	Dry
2022-04-21	Barbourula	busuangensis	0007D3AD78	No		20:10:00	63.9	Adult	31	Unknown	No	(C) 140-150m	Entrance rock	Dry
2022-04-21	Barbourula	busuangensis	0007D34CD1	YES		20:20:00	53.6	Adult	19	Unknown	No	(C) 170m	Small pool	Dry
2022-04-25	Barbourula	busuangensis		No		19:04:00	28.8	Juvenile	5	Unknown	No	(A) 30m	Margin pool	Dry
2022-04-25	Barbourula	busuangensis		No		19:09:00	31.2	Juvenile	5	Unknown	No	(A) 50m	Margin pool	Dry
2022-04-25	Barbourula	busuangensis	0007D5E587	No		19:12:00	51.7	Adult	17	Unknown	No	(A) 60m	On rock	Dry
2022-04-25	Barbourula	busuangensis		No		19:25:00	34	Juvenile	6	Unknown	No	(B) 60m	Margin pool	Dry
2022-04-25	Barbourula	busuangensis	0007D2E5C7	YES		19:30:00	59.2	Adult	29	Unknown	No	(C) 10m	Margin pool	Dry
2022-04-25	Barbourula	busuangensis		No		19:48:00	29.7	Juvenile	2	Unknown	No	(C) 90m	Margin pool	Dry
2022-04-25	Barbourula	busuangensis	0007D5EDF1	YES		20:00:00	68.7	Adult	36	Unknown	No	(C) 110m	Margin pool	Dry
2022-04-25	Barbourula	busuangensis	0007D5F174	No		20:06:00	41	Subadult	9	Unknown	No	(C) 120m	On rock	Dry
2022-04-25	Barbourula	busuangensis	0007D5DEC4	No		20:06:00	53.5	Adult	19	Unknown	No	(C) 120m	Margin pool	Dry
2022-04-25	Barbourula	busuangensis	0007D5FA55	No		20:11:00	86	Adult	67	Unknown	No	(C) 130-140m	On rock	Dry
2022-04-25	Barbourula	busuangensis	0007D5FC98	No		20:18:00	50.2	Adult	17	Unknown	No	(C) 150-160m	Margin pool	Dry
2022-04-25	Barbourula	busuangensis	0007D5D7C7	No		20:35:00	79.9	Adult	60	Unknown	No	(C) 200m	Margin pool	Dry
2022-04-30	Barbourula	busuangensis		No		18:53:00	30.8	Juvenile	4	Unknown	No	(A) 30-40m	Margin pool	Dry
2022-04-30	Barbourula	busuangensis		No		19:06:00	28.4	Juvenile	4	Unknown	No	(A) 90-100m	Margin pool	Dry
2022-04-30	Barbourula	busuangensis		No		19:15:00	33.4	Juvenile	6	Unknown	No	(B) 60m	Margin pool	Dry
2022-04-30	Barbourula	busuangensis	0007D5ECDE	No		20:00:00	40.7	Subadult	12	Unknown	No	(C) 200m	Margin pool	Dry
2022-04-30	Barbourula	busuangensis	0007E547C4	YES		20:00:00	74.6	Adult	54	Unknown	No	(C) 200m	On rock	Dry
2022-04-30	Barbourula	busuangensis		No		20:10:00	30.8	Juvenile	5	Unknown	No	(C) 200-210m	Entrance of rock	Dry
2022-04-30	Barbourula	busuangensis	0007D60A81	No		20:11:00	46.2	Subadult	10	Unknown	No	(C) 200-210m	Entrance of rock	Dry
2022-04-30	Barbourula	busuangensis	0007D33212	No		20:15:00	64.4	Adult	38.5	Unknown	No	(C) 220m	Small pool	Dry
2022-04-30	Barbourula	busuangensis		No		21:00:00	11.1	Juvenile	x	Unknown	No	(C) 220m	Margin pool	Dry
2022-04-30	Barbourula	busuangensis		No		21:00:00	11.5	Juvenile	x	Unknown	No	(C) 220m	Margin pool	Dry
2022-04-30	Barbourula	busuangensis		No		21:00:00	12.3	Juvenile	x	Unknown	No	(C) 220m	Margin pool	Dry
2022-04-30	Barbourula	busuangensis	0007D39654	No		21:45:00	81.2	Adult	71	Unknown	No	(B) 40m	Margin pool	Dry
2022-05-03	Barbourula	busuangensis		No		20:00:00	11.2	Juvenile		Unknown	No	(C) 220m	Margin pool	Transition	Dry
2022-05-03	Barbourula	busuangensis		No		20:00:00	12.1	Juvenile		Unknown	No	(C) 220m	Margin pool	Transition	Dry
2022-05-03	Barbourula	busuangensis		No		20:00:00	12.1	Juvenile		Unknown	No	(C) 220m	Margin pool	Transition	Dry
2022-05-05	Barbourula	busuangensis	0007D2D5C4	No		19:22:00	57.3	Adult	35	Unknown	No	SR: 12º12’12” N 119º55’9” E	Entrance of rock	Transition	Dry
2022-05-05	Barbourula	busuangensis	0007D5D3A8	No		19:24:00	75.2	Adult	48	Unknown	No	SR: 12º12’13” N 119º55’10” E	Small pool	Transition	Dry
2022-05-05	Barbourula	busuangensis	0007D60246	No		19:28:00	64.2	Adult	53	Unknown	No	SR: 12º12’13” N 119º55’10” E	Entrance of rock	Transition	Dry
2022-05-05	Barbourula	busuangensis	0007D60AC7	No		19:34:00	51	Adult	25	Unknown	No	SR: 12º12’13” N 119º55’10” E	Entrance of rock	Transition	Dry
2022-05-05	Barbourula	busuangensis		No		19:41:00	30.8	Juvenile	7	Unknown	No	SR: 12º12’12” N 119º55’12” E	Margin pool	Transition	Dry
2022-05-05	Barbourula	busuangensis	0007D31B91	No		19:43:00	76.7	Adult	70	Female	Gravid	SR: 12º12’12” N 119º55’13” E	Big pool	Transition	Dry
2022-05-05	Barbourula	busuangensis	0007D5D7F0	YES		19:50:00	43.8	Subadult	13	Unknown	No	SR: 12º12’12” N 119º55’13” E	Margin pool	Transition	Dry
2022-05-05	Barbourula	busuangensis		No		19:55:00	28.7	Juvenile	10	Unknown	No	SR: 12º12’13” N 119º55’13” E	Margin pool	Transition	Dry
2022-05-05	Barbourula	busuangensis	0007D5D933	No		19:55:00	46	Subadult	18	Unknown	No	SR: 12º12’13” N 119º55’13” E	Entrance of rock	Transition	Dry
2022-05-05	Barbourula	busuangensis	0007D2CB88	No		20:02:00	41.5	Subadult	15	Unknown	No	SR: 12º12’13” N 119º55’14” E	Margin pool	Transition	Dry
2022-05-05	Barbourula	busuangensis	0007D5DC8F	No		20:02:00	65.9	Adult	50	Unknown	No	SR: 12º12’13” N 119º55’14” E	Margin pool	Transition	Dry
2022-05-05	Barbourula	busuangensis	0007D5D87F	No		20:07:00	64.3	Adult	44	Unknown	No	SR: 12º12’15” N 119º55’14” E	Rock cave	Transition	Dry
2022-05-05	Barbourula	busuangensis	0007D5E7F0	No		20:08:00	57.7	Adult	28	Unknown	No	SR: 12º12’15” N 119º55’14” E	Margin pool	Transition	Dry
2022-05-05	Barbourula	busuangensis	0007D5F184	No		20:13:00	72.3	Adult	50	Female	Gravid	SR: 12º12’15” N 119º55’16” E	Rock cave	Transition	Dry
2022-05-05	Barbourula	busuangensis	0007D2B5D2	No		20:18:00	41	Subadult	15	Unknown	No	SR: 12º12’15” N 119º55’16” E	Small pool	Transition	Dry
2022-05-05	Barbourula	busuangensis	0007D2FB82	No		20:18:00	76.2	Adult	80	Unknown	No	SR: 12º12’16” N 119º55’15” E	Margin pool	Transition	Dry
2022-05-06	Barbourula	busuangensis	0007D5DA58	No		19:34:00	40.6	Subadult	13	Unknown	No	SR: 12º12’12” N 119º55’8” E	Entrance of rock	Transition	Dry
2022-05-06	Barbourula	busuangensis	0007D5FC99	YES		19:34:00	53.9	Adult	38	Unknown	No	SR: 12º12’12” N 119º55’8” E	Margin pool	Transition	Dry
2022-05-06	Barbourula	busuangensis	0007D5DD04	No		19:42:00	56.7	Adult	31	Unknown	No	SR: 12º12’12” N 119º55’12” E	Entrance of rock	Transition	Dry
2022-05-06	Barbourula	busuangensis	0007D5CC0C	No		19:44:00	43.9	Subadult	19	Unknown	No	SR: 12º12’12” N 119º55’9” E	Entrance of rock	Transition	Dry
2022-05-06	Barbourula	busuangensis		No		19:49:00	30	Juvenile	8	Unknown	No	SR: 12º12’11” N 119º55’15” E	Margin pool	Transition	Dry
2022-05-06	Barbourula	busuangensis	0007D35835	No		19:49:00	53.1	Adult	26	Unknown	No	SR: 12º12’11” N 119º55’15” E	Margin pool	Transition	Dry
2022-05-06	Barbourula	busuangensis		No		19:52:00	35	Juvenile	10	Unknown	No	SR: 12º12’12” N 119º55’13” E	Margin pool	Transition	Dry
2022-05-06	Barbourula	busuangensis	0007D2B501	No		19:52:00	51	Adult	22	Unknown	No	SR: 12º12’12” N 119º55’13” E	Margin pool	Transition	Dry
2022-05-06	Barbourula	busuangensis		No		19:52:00	34.1	Juvenile	8	Unknown	No	SR: 12º12’12” N 119º55’13” E	Margin pool	Transition	Dry
2022-05-06	Barbourula	busuangensis		No		19:56:00	28.1	Juvenile	6	Unknown	No	SR: 12º12’13” N 119º55’13” E	Margin pool	Transition	Dry
2022-05-06	Barbourula	busuangensis		No		20:00:00	28.3	Juvenile	6	Unknown	No	SR: 12º12’13” N 119º55’12” E	Margin pool	Transition	Dry
2022-05-06	Barbourula	busuangensis	0007D5D7F0	YES		20:05:00	44.1	Subadult	13	Unknown	No	SR: 12º12’13” N 119º55’13” E	Rock cave	Transition	Dry
2022-05-06	Barbourula	busuangensis	0007D35A43	No		20:05:00	63.3	Adult	46	Unknown	No	SR: 12º12’12” N 119º55’15” E	Margin pool	Transition	Dry
2022-05-06	Barbourula	busuangensis		No		20:09:00	28.7	Juvenile	7	Unknown	No	SR: 12º12’12” N 119º55’15” E	Entrance of rock	Transition	Dry
2022-05-06	Barbourula	busuangensis		No		20:09:00	29	Juvenile	6	Unknown	No	SR: 12º12’13” N 119º55’14” E	Margin pool	Transition	Dry
2022-05-06	Barbourula	busuangensis		No		20:09:00	25.1	Juvenile	6	Unknown	No	SR: 12º12’13” N 119º55’14” E	Margin pool	Transition	Dry
2022-05-06	Barbourula	busuangensis		No		20:09:00	23.2	Juvenile	5	Unknown	No	SR: 12º12’13” N 119º55’14” E	Margin pool	Transition	Dry
2022-05-06	Barbourula	busuangensis		No		20:19:00	26.9	Juvenile	5	Unknown	No	SR: 12º12’13” N 119º55’14” E	Margin pool	Transition	Dry
2022-05-06	Barbourula	busuangensis		No		20:22:00	32.1	Juvenile	7	Unknown	No	SR: 12º12’13” N 119º55’14” E	Margin pool	Transition	Dry
2022-05-06	Barbourula	busuangensis	0007D5D933	YES		20:22:00	46.8	Subadult	18	Unknown	No	SR: 12º12’13” N 119º55’13” E	Margin pool	Transition	Dry
2022-05-06	Barbourula	busuangensis	0007D62D66	No		20:24:00	39.2	Subadult	11	Unknown	No	SR: 12º12’14” N 119º55’13” E	Margin pool	Transition	Dry
2022-05-06	Barbourula	busuangensis	0007D5B7CF	No		20:30:00	70	Adult	55	Unknown	No	SR: 12º12’16” N 119º55’14” E	Entrance of rock	Transition	Dry
2022-05-11	Barbourula	busuangensis		No		18:55:00	30	Juvenile	4	Unknown	No	(A) 50m	Margin pool	Transition	Dry
2022-05-11	Barbourula	busuangensis		No		19:04:00	27.2	Juvenile	3	Unknown	No	(B) 0m	Entrance of rock	Transition	Dry
2022-05-11	Barbourula	busuangensis		No		19:15:00	17.3	Juvenile	1	Unknown	No	(B) 50m	Small pool	Transition	Dry
2022-05-11	Barbourula	busuangensis	0007D5BE77	No		19:30:00	55.8	Adult	22	Unknown	No	(C) 30-40m	Margin pool	Transition	Dry
2022-05-11	Barbourula	busuangensis		No		19:34:00	26.3	Juvenile	3	Unknown	No	(C) 60-70m	Margin pool	Transition	Dry
2022-05-11	Barbourula	busuangensis		No		19:41:00	33.8	Juvenile	7	Unknown	No	(C) 90-100m	Margin pool	Transition	Dry
2022-05-11	Barbourula	busuangensis	0007D5EB12	No		19:46:00	60.1	Adult	32	Unknown	No	(C) 110-120m	Rock cave	Transition	Dry
2022-05-11	Barbourula	busuangensis	0007D2C649	No		19:51:00	49	Subadult	20	Unknown	No	(C) 120-130m	Entrance of rock	Transition	Dry
2022-05-11	Barbourula	busuangensis		No		20:01:00	29.2	Juvenile	4	Unknown	No	(C) 170-180m	Margin pool	Transition	Dry
2022-05-11	Barbourula	busuangensis		No		20:03:00	30.4	Juvenile	4	Unknown	No	(C) 180m	Margin pool	Transition	Dry
2022-05-11	Barbourula	busuangensis		No		20:10:00	33.6	Juvenile	5	Unknown	No	(C) 200m	Entrance of rock	Transition	Dry
2022-05-11	Barbourula	busuangensis		No		20:18:00	33.8	Juvenile	6	Unknown	No	(C) 220m	Margin pool	Transition	Dry
2022-05-11	Barbourula	busuangensis		No		20:20:00	28.8	Juvenile	4	Unknown	No	(C) 220m	On rock in river	Transition	Dry
2022-05-11	Barbourula	busuangensis		No		20:27:00	31.8	Juvenile	5	Unknown	No	(C) 220m	Margin pool	Transition	Dry
2022-05-11	Barbourula	busuangensis		No		20:30:00	11.6	Juvenile	0	Unknown	No	(C) 220m	Margin pool	Transition	Dry
2022-05-11	Barbourula	busuangensis		No		20:30:00	11.5	Juvenile	0	Unknown	No	(C) 220m	Margin pool	Transition	Dry
2022-05-11	Barbourula	busuangensis		No		20:30:00	12.3	Juvenile	0	Unknown	No	(C) 220m	Margin pool	Transition	Dry
2022-05-11	Barbourula	busuangensis		No		20:30:00	11.5	Juvenile	0	Unknown	No	(C) 220m	Margin pool	Transition	Dry
2022-05-11	Barbourula	busuangensis		No		20:30:00	11.3	Juvenile	0	Unknown	No	(C) 220m	Margin pool	Transition	Dry
2022-05-11	Barbourula	busuangensis		No		20:30:00	13	Juvenile	0	Unknown	No	(C) 220m	Margin pool	Transition	Dry
2022-05-11	Barbourula	busuangensis		No		20:30:00	11.5	Juvenile	0	Unknown	No	(C) 220m	Margin pool	Transition	Dry
2022-05-11	Barbourula	busuangensis		No		20:30:00	11	Juvenile	0	Unknown	No	(C) 220m	Margin pool	Transition	Dry
2022-05-11	Barbourula	busuangensis		No		20:30:00	11.9	Juvenile	0	Unknown	No	(C) 220m	Margin pool	Transition	Dry
2022-05-11	Barbourula	busuangensis		No		20:30:00	11.3	Juvenile	0	Unknown	No	(C) 220m	Margin pool	Transition	Dry
2022-05-11	Barbourula	busuangensis		No		20:30:00	12.1	Juvenile	0	Unknown	No	(C) 220m	Margin pool	Transition	Dry
2022-05-15	Barbourula	busuangensis	0007D3A69D	No		19:39:00	58.4	Adult	28	Unknown	No	(A) 0m	Entrance of rock	Transition	Rain
2022-05-15	Barbourula	busuangensis		No		19:44:00	28.2	Juvenile	5	Unknown	No	(A) 30m	Margin pool	Transition	Rain
2022-05-15	Barbourula	busuangensis	0007E54A85	YES		19:47:00	43.1	Subadult	12	Unknown	No	(A) 50m	Margin pool	Transition	Rain
2022-05-15	Barbourula	busuangensis	0007D48482	No		19:47:00	38.1	Subadult	9	Unknown	No	(A) 50m	Margin pool	Transition	Rain
2022-05-15	Barbourula	busuangensis	0007D39654	YES		19:59:00	79.3	Adult	84	Unknown	No	(B) 40-50m	On rock	Transition	Rain
2022-05-15	Barbourula	busuangensis	0007D33806	YES		20:09:00	78.5	Adult	65	Unknown	No	(C) 20m	Rock cave	Transition	Rain
2022-05-15	Barbourula	busuangensis	0007D5BA1E	No		20:15:00	64.1	Adult	65	Unknown	No	(C) 40-50m	Margin pool	Transition	Rain
2022-05-15	Barbourula	busuangensis		No		20:15:00	35	Juvenile	9	Unknown	No	(C) 40-50m	Margin pool	Transition	Rain
2022-05-15	Barbourula	busuangensis	0007D5ED75	No		20:18:00	52.2	Adult	20	Unknown	No	(C) 70-80m	Margin pool	Transition	Rain
2022-05-15	Barbourula	busuangensis	0007D5F86D	No		20:22:00	78.5	Adult	90	Unknown	No	(C) 90-100m	Entrance of rock	Transition	Rain
2022-05-15	Barbourula	busuangensis		No		20:23:00	32.9	Juvenile	6	Unknown	No	(C) 100m	Margin pool	Transition	Rain
2022-05-15	Barbourula	busuangensis	0007D33314	No		20:27:00	58.1	Adult	23	Unknown	No	(C) 100-110m	Margin pool	Transition	Rain
2022-05-15	Barbourula	busuangensis	0007D5F174	YES		20:30:00	40.6	Subadult	12	Unknown	No	(C) 110-120m	Margin pool	Transition	Rain
2022-05-15	Barbourula	busuangensis	0007D2CEE6	No		20:32:00	40.1	Subadult	10	Unknown	No	(C) 120m	Margin pool	Transition	Rain
2022-05-15	Barbourula	busuangensis	0007D2DC67	No		20:36:00	77.6	Adult	55	Unknown	No	(C) 140m	Entrance of rock	Transition	Rain
2022-05-15	Barbourula	busuangensis		No		20:40:00	26.5	Juvenile	3	Unknown	No	(C) 160m	Margin pool	Transition	Rain
2022-05-15	Barbourula	busuangensis		No		20:43:00	29	Juvenile	4	Unknown	No	(C) 160-170m	Margin pool	Transition	Rain
2022-05-15	Barbourula	busuangensis	0007D34CD1	YES		20:46:00	53.8	Adult	20	Unknown	No	(C) 170m	On rock	Transition	Rain
2022-05-15	Barbourula	busuangensis	0007D5F114	No		20:47:00	69.6	Adult	44	Unknown	No	(C) 180m	Margin pool	Transition	Rain
2022-05-15	Barbourula	busuangensis	0007D5D6F9	No		20:51:00	94.4	Adult	100	Unknown	No	(C) 210-220m	Margin pool	Transition	Rain
2022-05-15	Barbourula	busuangensis		No		21:00:00	11.3	Juvenile	0	Unknown	No	(C) 220m	Margin pool	Transition	Rain
2022-05-19	Barbourula	busuangensis	0007D5E4C4	No		19:01:00	80.4	Adult	76	Unknown	No	(A) 30m	Margin pool	Transition	Cloudy
2022-05-19	Barbourula	busuangensis	0007D48482	YES		19:04:00	38.2	Subadult	10	Unknown	No	(A) 50-60m	Entrance of rock	Transition	Cloudy
2022-05-19	Barbourula	busuangensis	0007D2DA72	No		19:19:00	79.5	Adult	83	Unknown	No	(B) 70m	Entrance of rock	Transition	Cloudy
2022-05-19	Barbourula	busuangensis	0007D5E7B2	No		19:20:00	49.1	Subadult	16	Unknown	No	(B) 70m	Entrance of rock	Transition	Cloudy
2022-05-19	Barbourula	busuangensis	0007D5E88D	No		19:22:00	44	Subadult	10	Unknown	No	(B) 80m	Entrance of rock	Transition	Cloudy
2022-05-19	Barbourula	busuangensis	0007D39402	No		19:30:00	67.1	Adult	39	Unknown	No	(C) 30m	Margin pool	Transition	Cloudy
2022-05-19	Barbourula	busuangensis	0007E90138	YES		19:55:00	43.4	Subadult	14	Unknown	No	(C) 200m	Rock cave	Transition	Cloudy
2022-05-19	Barbourula	busuangensis		No		19:58:00	33	Juvenile	6	Unknown	No	(C) 200-210m	Entrance of rock	Transition	Cloudy
2022-05-19	Barbourula	busuangensis	0007D60A81	YES		19:59:00	47.3	Subadult	14	Unknown	No	(C) 210m	Margin pool	Transition	Cloudy
2022-05-19	Barbourula	busuangensis		No		20:02:00	34.8	Juvenile	6	Unknown	No	(C) 220m	Margin pool	Transition	Cloudy
2022-05-19	Barbourula	busuangensis	0007D2B9C1	No		20:04:00	72.8	Adult	66	Unknown	No	(C) 220m	Rock cave	Transition	Cloudy
2022-05-19	Barbourula	busuangensis	0007D5DE37	No		20:04:00	79.6	Adult	70	Unknown	No	(C) 220m	On rock	Transition	Cloudy
2022-05-19	Barbourula	busuangensis		No		20:10:00	11.3	Juvenile	0	Unknown	No	(C) 220m	Margin pool	Transition	Cloudy
2022-05-19	Barbourula	busuangensis		No		20:10:00	12.4	Juvenile	0	Unknown	No	(C) 220m	Margin pool	Transition	Cloudy
2022-05-19	Barbourula	busuangensis		No		20:10:00	12.3	Juvenile	0	Unknown	No	(C) 220m	Margin pool	Transition	Cloudy
2022-05-19	Barbourula	busuangensis		No		20:10:00	12.3	Juvenile	0	Unknown	No	(C) 220m	Margin pool	Transition	Cloudy
2022-05-21	Barbourula	busuangensis		No		19:40:00	12.5	Juvenile	0	Unknown	No	(C) 220m	Margin pool	Transition	Rain
2022-05-24	Barbourula	busuangensis		No		18:47:00	32.6	Juvenile	3	Unknown	No	(A) 30-40m	Margin pool	Transition	Dry
2022-05-24	Barbourula	busuangensis	0007E54A85	YES		18:50:00	43.2	Subadult	13	Unknown	No	(A) 50-60m	Entrance of rock	Transition	Dry
2022-05-24	Barbourula	busuangensis	0007D48482	YES		18:51:00	39.4	Subadult	10	Unknown	No	(A) 50-60m	Entrance of rock	Transition	Dry
2022-05-24	Barbourula	busuangensis	0007D2CA3B	No		19:08:00	35.9	Subadult	9	Unknown	No	(B) 50-60m	Entrance of rock	Transition	Dry
2022-05-24	Barbourula	busuangensis		No		19:24:00	27.2	Juvenile	3	Unknown	No	(C) 60-70m	Margin pool	Transition	Dry
2022-05-24	Barbourula	busuangensis	0007D5F174	YES		19:34:00	41.4	Subadult	14	Unknown	No	(C) 110-120m	Margin pool	Transition	Dry
2022-05-24	Barbourula	busuangensis	0007D2CEE6	YES		19:35:00	40	Subadult	10	Unknown	No	(C) 120m	Margin pool	Transition	Dry
2022-05-24	Barbourula	busuangensis		No		19:36:00	31.1	Juvenile	5	Unknown	No	(C) 120-130m	Margin pool	Transition	Dry
2022-05-24	Barbourula	busuangensis	0007D5DCC6	No		19:51:00	38.2	Subadult	7	Unknown	No	(C) 200-210m	On rock	Transition	Dry
2022-05-24	Barbourula	busuangensis		No		19:55:00	30.8	Juvenile	5	Unknown	No	(C) 220m	Margin pool	Transition	Dry
2022-05-24	Barbourula	busuangensis		No		20:09:00	12	Juvenile	0	Unknown	No	(C) 220m	Margin pool	Transition	Dry
2022-05-24	Barbourula	busuangensis		No		20:09:00	12.1	Juvenile	0	Unknown	No	(C) 220m	Margin pool	Transition	Dry
2022-05-24	Barbourula	busuangensis		No		20:09:00	11	Juvenile	0	Unknown	No	(C) 220m	Margin pool	Transition	Dry
2022-05-24	Barbourula	busuangensis		No		20:09:00	13.1	Juvenile	0	Unknown	No	(C) 220m	Margin pool	Transition	Dry
2022-05-24	Barbourula	busuangensis		No		20:09:00	12.2	Juvenile	0	Unknown	No	(C) 220m	Margin pool	Transition	Dry
2022-05-24	Barbourula	busuangensis		No		20:09:00	11.4	Juvenile	0	Unknown	No	(C) 220m	Margin pool	Transition	Dry
2022-05-24	Barbourula	busuangensis		No		20:09:00	12.4	Juvenile	0	Unknown	No	(C) 220m	Margin pool	Transition	Dry
2022-05-24	Barbourula	busuangensis		No		20:09:00	11.5	Juvenile	0	Unknown	No	(C) 220m	Margin pool	Transition	Dry
2022-05-26	Barbourula	busuangensis		No		18:49:00	33.8	Juvenile	4	Unknown	No	(A) 30m	Entrance of rock	Transition	Rain
2022-05-26	Barbourula	busuangensis		No		18:49:00	11.2	Juvenile	0	Unknown	No	(A) 30m	Margin pool	Transition	Rain
2022-05-26	Barbourula	busuangensis	0007E54A85	YES		18:52:00	42.8	Subadult	12	Unknown	No	(A) 50m	Margin pool	Transition	Rain
2022-05-26	Barbourula	busuangensis	0007D48482	YES		18:54:00	39.3	Subadult	10	Unknown	No	(A) 50-60m	Entrance of rock	Transition	Rain
2022-05-26	Barbourula	busuangensis	0007D628DD	No		19:07:00	65.6	Adult	40	Unknown	No	(B) 50m	Small pool	Transition	Rain
2022-05-26	Barbourula	busuangensis	0007D2CA3B	YES		19:10:00	35.9	Subadult	9	Unknown	No	(B) 50-60m	Entrance of rock	Transition	Rain
2022-05-26	Barbourula	busuangensis		No		19:40:00	28.7	Juvenile	3	Unknown	No	(C) 180m	On rock	Transition	Rain
2022-05-26	Barbourula	busuangensis	0007D5DCC6	YES		19:45:00	37.8	Subadult	8	Unknown	No	(C) 200-210m	Margin pool	Transition	Rain
2022-05-26	Barbourula	busuangensis		No		19:50:00	31.4	Juvenile	5	Unknown	No	(C) 220m	Margin pool	Transition	Rain
2022-05-26	Barbourula	busuangensis	0007D33212	YES		19:51:00	63.9	Adult	39	Unknown	No	(C) 220m	Small pool	Transition	Rain
2022-05-26	Barbourula	busuangensis		No		20:00:00	12.3	Juvenile	0	Unknown	No	(C) 220m	Margin pool	Transition	Rain
2022-06-01	Barbourula	busuangensis		No	Blue	19:13:00	32	Juvenile	6	Unknown	No	(A) 30m	Margin pool	Wet	Rain
2022-06-01	Barbourula	busuangensis		No	Yellow	19:13:00	11.3	Juvenile	0	Unknown	No	(A) 30m	Margin pool	Wet	Rain
2022-06-01	Barbourula	busuangensis	0007E4C1A4	YES		19:23:00	36.3	Subadult	7	Unknown	No	(A) 80-90m	Margin pool	Wet	Rain
2022-06-01	Barbourula	busuangensis	0007D2CD97	No		19:41:00	58.2	Adult	26	Unknown	No	(B) 60-70m	Margin pool	Wet	Rain
2022-06-01	Barbourula	busuangensis	0007D5E88D	YES		19:44:00	43.6	Subadult	11	Unknown	No	(B) 80m	Margin pool	Wet	Rain
2022-06-01	Barbourula	busuangensis	0007D3DDD5	No		20:09:00	35.5	Juvenile	7	Unknown	No	(C) 90-100m	Margin pool	Wet	Rain
2022-06-01	Barbourula	busuangensis	0007D5E127	No		20:13:00	46.0	Subadult	14	Unknown	No	(C) 110m	On rock	Wet	Rain
2022-06-01	Barbourula	busuangensis		No	Blue	20:17:00	28.1	Juvenile	3	Unknown	No	(C) 120m	Margin pool	Wet	Rain
2022-06-01	Barbourula	busuangensis	0007D5FA55	YES		20:22:00	85.9	Adult	59	Unknown	No	(C) 130m	On rock	Wet	Rain
2022-06-01	Barbourula	busuangensis	0007D5DB13	No		20:33:00	71.3	Adult	53	Unknown	No	(C) 160-170m	On rock	Wet	Rain
2022-06-01	Barbourula	busuangensis	0007D5F114	YES		20:37:00	70.1	Adult	40	Unknown	No	(C) 170m	On rock	Wet	Rain
2022-06-01	Barbourula	busuangensis	0007D3367E	No		20:38:00	54.9	Adult	18	Unknown	No	(C) 170-180m	Small pool	Wet	Rain
2022-06-01	Barbourula	busuangensis		No	Blue	20:44:00	33.5	Juvenile	6	Unknown	No	(C) 190-200m	Margin pool	Wet	Rain
2022-06-01	Barbourula	busuangensis		No	Blue	20:48:00	34.2	Juvenile	6	Unknown	No	(C) 200-210m	Entrance of rock	Wet	Rain
2022-06-01	Barbourula	busuangensis		No	Blue	20:48:00	22.4	Juvenile	1	Unknown	No	(C) 200-210m	Margin pool	Wet	Rain
2022-06-01	Barbourula	busuangensis		No	Blue	20:54:00	32.2	Juvenile	5	Unknown	No	(C) 220m	Margin pool	Wet	Rain
2022-06-01	Barbourula	busuangensis		No	Yellow	21:00:00	11.8	Juvenile	0	Unknown	No	(C) 220m	Margin pool	Wet	Rain
2022-06-01	Barbourula	busuangensis		No	Yellow	21:00:00	13	Juvenile	0	Unknown	No	(C) 220m	Margin pool	Wet	Rain
2022-06-01	Barbourula	busuangensis	0007D612FD	No		22:00:00	81.1	Adult	91	Unknown	No	(A) 40	Small pool	Wet	Rain
2022-06-04	Barbourula	busuangensis	0007D2B4DD	No		19:49:00	71.6	Adult	59	Unknown	No	SR: 12º12’2” N 119º55’2” E	Margin pool	Wet	Rain
2022-06-04	Barbourula	busuangensis	0007D5DA58	YES		19:49:00	41.4	Subadult	12	Unknown	No	SR: 12º12’2” N 119º55’2” E	Margin pool	Wet	Rain
2022-06-04	Barbourula	busuangensis	0007D2D5C4	YES		19:49:00	58.3	Adult	29	Unknown	No	SR: 12º12’2” N 119º55’2” E	Margin pool	Wet	Rain
2022-06-04	Barbourula	busuangensis	0007D60906	No		19:51:00	50.4	Adult	18	Unknown	No	SR: 12º12’12” N 119º55’9” E	Margin pool	Wet	Rain
2022-06-04	Barbourula	busuangensis	0007D5D3A8	YES		19:51:00	74	Adult	57	Unknown	No	SR: 12º12’12” N 119º55’9” E	Entrance of rock	Wet	Rain
2022-06-04	Barbourula	busuangensis	0007D2F050	No		19:56:00	43.1	Subadult	12	Unknown	No	SR: 12º12’12” N 119º55’11” E	Small pool	Wet	Rain
2022-06-04	Barbourula	busuangensis	0007D3324E	No		20:03:00	69.7	Adult	53	Unknown	No	SR: 12º12’12” N 119º55’12” E	Entrance of rock	Wet	Rain
2022-06-04	Barbourula	busuangensis	0007D60203	No		20:03:00	45.3	Subadult	17	Unknown	No	SR: 12º12’12” N 119º55’12” E	Small pool	Wet	Rain
2022-06-04	Barbourula	busuangensis	0007D2C621	No		20:03:00	81.1	Adult	65	Unknown	No	SR: 12º12’12” N 119º55’12” E	Small pool	Wet	Rain
2022-06-04	Barbourula	busuangensis	0007D5FE71	No		20:12:00	82.2	Adult	78	Unknown	No	SR: 12º12’12” N 119º55’12” E	Margin pool	Wet	Rain
2022-06-04	Barbourula	busuangensis	0007D39A55	No		20:12:00	39.1	Subadult	10	Unknown	No	SR: 12º12’12” N 119º55’12” E	Small pool	Wet	Rain
2022-06-04	Barbourula	busuangensis		No	Blue	20:12:00	33.9	Juvenile	7	Unknown	No	SR: 12º12’12” N 119º55’12” E	Small pool	Wet	Rain
2022-06-04	Barbourula	busuangensis	0007D2B501	YES		20:14:00	51.6	Adult	26	Unknown	No	SR: 12º12’14” N 119º55’14” E	Entrance of rock	Wet	Rain
2022-06-04	Barbourula	busuangensis	0007D5B7CF	YES		20:19:00	72.2	Adult	54	Unknown	No	SR: 12º12’14” N 119º55’14” E	Small pool	Wet	Rain
2022-06-04	Barbourula	busuangensis		No	Blue	20:20:00	30	Juvenile	9	Unknown	No	SR: 12º12’14” N 119º55’14” E	Entrance of rock	Wet	Rain
2022-06-04	Barbourula	busuangensis	0007D2D327	No		20:24:00	41.9	Subadult	10	Unknown	No	SR: 12º12’14” N 119º55’14” E	Small pool	Wet	Rain
2022-06-04	Barbourula	busuangensis	0007D3BD52	No		20:27:00	68.1	Adult	51	Unknown	No	SR: 12º12’14” N 119º55’13” E	Entrance of rock	Wet	Rain
2022-06-04	Barbourula	busuangensis	0007D39400	No		20:29:00	63.9	Adult	43	Unknown	No	SR: 12º12’14” N 119º55’13” E	Small pool	Wet	Rain
2022-06-04	Barbourula	busuangensis	0007D3ADF6	No		20:39:00	42.7	Subadult	16	Unknown	No	SR: 12º12’15” N 119º55’14” E	On rock	Wet	Rain
2022-06-04	Barbourula	busuangensis	0007D5B7C7	No		20:39:00	51.2	Adult	24	Unknown	No	SR: 12º12’15” N 119º55’14” E	Small pool	Wet	Rain
2022-06-04	Barbourula	busuangensis	0007D5CDDE	No		20:48:00	65.2	Adult	49	Unknown	No	SR: 12º12’15” N 119º55’14” E	Margin pool	Wet	Rain
2022-06-04	Barbourula	busuangensis	0007D5E7F0	YES		20:48:00	58	Adult	29	Unknown	No	SR: 12º12’15” N 119º55’14” E	Margin pool	Wet	Rain
2022-06-04	Barbourula	busuangensis	0007D3571B	No		20:48:00	46.6	Subadult	18	Unknown	No	SR: 12º12’15” N 119º55’14” E	On rock	Wet	Rain
2022-06-04	Barbourula	busuangensis		No	Blue	20:48:00	28.9	Juvenile	9	Unknown	No	SR: 12º12’15” N 119º55’14” E	Small pool	Wet	Rain
2022-06-04	Barbourula	busuangensis	0007D5B2B6	No		20:48:00	74.1	Adult	56	Female	No	SR: 12º12’15” N 119º55’14” E	On rock	Wet	Rain
2022-06-04	Barbourula	busuangensis	0007D5EFBE	No		21:06:00	41.1	Subadult	11	Unknown	No	SR: 12º12’17” N 119º55’15” E	On rock	Wet	Rain
2022-06-04	Barbourula	busuangensis	0007D4871C	No		21:06:00	43.7	Subadult	18	Unknown	No	SR: 12º12’17” N 119º55’15” E	On rock	Wet	Rain
2022-06-04	Barbourula	busuangensis	0007D3A041	No		21:06:00	51.2	Adult	22	Unknown	No	SR: 12º12’17” N 119º55’15” E	On rock	Wet	Rain
2022-06-04	Barbourula	busuangensis	0007D2C101	No		21:09:00	74.2	Adult	57	Unknown	No	SR: 12º12’16” N 119º55’14” E	Entrance of rock	Wet	Rain
2022-06-04	Barbourula	busuangensis	0007D5E1C4	No		21:09:00	45.6	Subadult	17	Unknown	No	SR: 12º12’16” N 119º55’14” E	Small pool	Wet	Rain
2022-06-04	Barbourula	busuangensis	0007D39EEF	No		21:16:00	67.7	Adult	53	Unknown	No	SR: 12º12’17” N 119º55’15” E	On rock	Wet	Rain
2022-06-04	Barbourula	busuangensis		No	Blue	21:20:00	23.8	Juvenile	5	Unknown	No	SR: 12º12’17” N 119º55’15” E	On rock	Wet	Rain
2022-06-04	Barbourula	busuangensis	0007D2CE11	No		21:20:00	79	Adult	75	Unknown	No	SR: 12º12’17” N 119º55’15” E	On rock	Wet	Rain
2022-06-04	Barbourula	busuangensis	0007D2B5D2	YES		21:20:00	41.7	Subadult	19	Unknown	No	SR: 12º12’17” N 119º55’15” E	Margin pool	Wet	Rain
2022-06-04	Barbourula	busuangensis		No	Blue	21:23:00	22.7	Juvenile	5	Unknown	No	SR: 12º12’18” N 119º55’16” E	Margin pool	Wet	Rain
2022-06-04	Barbourula	busuangensis	0007D5DBE1	No		21:26:00	85.2	Adult	74	Unknown	No	SR: 12º12’18” N 119º55’16” E	Entrance of rock	Wet	Rain
2022-06-04	Barbourula	busuangensis	0007D5D4D2	No		21:30:00	55.1	Adult	26	Unknown	No	SR: 12º12’19” N 119º55’15” E	Big pool	Wet	Rain
2022-06-04	Barbourula	busuangensis	0007D330A2	No		21:30:00	77	Adult	70	Unknown	No	SR: 12º12’19” N 119º55’15” E	Big pool	Wet	Rain
2022-06-04	Barbourula	busuangensis		No	Yellow	21:35:00	14.9	Juvenile	0	Unknown	No	SR: 12º12’19”N 119º55’16”E	Cave in rock	Wet	Rain
2022-06-05	Barbourula	busuangensis	0007D2D5C4	YES		19:46:00	57	Adult	29	Unknown	No	SR: 12º12’5” N 119º55’3” E	Entrance of rock	Wet	Rain
2022-06-05	Barbourula	busuangensis	0007D2B4DD	YES		19:48:00	71.1	Adult	56	Unknown	No	SR: 12º12’12” N 119º55’9” E	Small pool	Wet	Rain
2022-06-05	Barbourula	busuangensis	0007D5D3A8	YES		19:48:00	64.5	Adult	43	Unknown	No	SR: 12º12’12” N 119º55’9” E	Margin pool	Wet	Rain
2022-06-05	Barbourula	busuangensis	0007D60906	YES		19:48:00	50	Adult	16	Unknown	No	SR: 12º12’12” N 119º55’9” E	Margin pool	Wet	Rain
2022-06-05	Barbourula	busuangensis	0007D5FD68	No		19:53:00	76.2	Adult	71	Female	Gravid	SR: 12º12’12” N 119º55’9” E	Big pool	Wet	Rain
2022-06-05	Barbourula	busuangensis	0007D2E6AF	No		19:53:00	66.9	Adult	52	Female	Gravid	SR: 12º12’12” N 119º55’9” E	Margin pool	Wet	Rain
2022-06-05	Barbourula	busuangensis	0007D5CE8E	No		19:56:00	52.2	Adult	20	Unknown	No	SR: 12º12’12” N 119º55’10” E	Entrance of rock	Wet	Rain
2022-06-05	Barbourula	busuangensis	0007D2F050	YES		19:56:00	42.3	Subadult	12	Unknown	No	SR: 12º12’12” N 119º55’10” E	Margin pool	Wet	Rain
2022-06-05	Barbourula	busuangensis	0007D5E41F	No		20:00:00	79.5	Adult	70	Unknown	No	SR: . 12º12’12” N 119º55’11” E	Margin pool	Wet	Rain
2022-06-05	Barbourula	busuangensis		No	Blue	20:00:00	31.4	Juvenile	3	Unknown	No	SR: . 12º12’12” N 119º55’11” E	On rock	Wet	Rain
2022-06-05	Barbourula	busuangensis	0007D60AC7	YES		20:03:00	54.7	Adult	21	Unknown	No	SR: 12º12’12” N 119º55’12” E	Small pool	Wet	Rain
2022-06-05	Barbourula	busuangensis	0007D3DEA8	No		20:03:00	66.1	Adult	46	Unknown	No	SR: 12º12’12” N 119º55’12” E	Entrance of rock	Wet	Rain
2022-06-05	Barbourula	busuangensis	0007D5ED3C	No		20:03:00	55.3	Adult	26	Unknown	No	SR: 12º12’12” N 119º55’12” E	Entrance of rock	Wet	Rain
2022-06-05	Barbourula	busuangensis	0007D2C621	YES		20:06:00	72.6	Adult	44	Unknown	No	SR: 12º12’12” N 119º55’12” E	Margin pool	Wet	Rain
2022-06-05	Barbourula	busuangensis	0007D60203	YES		20:06:00	46.7	Subadult	18	Unknown	No	SR: 12º12’12” N 119º55’12” E	Margin pool	Wet	Rain
2022-06-05	Barbourula	busuangensis	0007D3324E	YES		20:06:00	70.1	Adult	49	Unknown	No	SR: 12º12’12” N 119º55’12” E	On rock	Wet	Rain
2022-06-05	Barbourula	busuangensis		No	Blue	20:07:00	33.7	Juvenile	6	Unknown	No	SR: 12º12’12” N 119º55’12” E	Margin pool	Wet	Rain
2022-06-05	Barbourula	busuangensis		No	Blue	20:10:00	32.4	Juvenile	4	Unknown	No	SR: 12º12’12” N 119º55’12” E	Margin pool	Wet	Rain
2022-06-05	Barbourula	busuangensis	0007D35835	YES		20:10:00	56.1	Adult	25	Unknown	No	SR: 12º12’12” N 119º55’12” E	Entrance of rock	Wet	Rain
2022-06-05	Barbourula	busuangensis	0007D5E58D	No		20:12:00	86.1	Adult	70	Unknown	No	SR: 12º10’41” N 119º54’27” E	On rock	Wet	Rain
2022-06-05	Barbourula	busuangensis	0007D313DE	No		20:15:00	57.1	Adult	23	Unknown	No	SR: 12º12’13” N 119º55’15” E	On rock	Wet	Rain
2022-06-05	Barbourula	busuangensis	0007D2B501	YES		20:16:00	57.2	Adult	19	Unknown	No	SR: 12º12’13” N 119º55’15” E	On rock	Wet	Rain
2022-06-05	Barbourula	busuangensis		No	Blue	20:18:00	28.7	Juvenile	3	Unknown	No	SR: 12º12’13” N 119º55’12” E	Margin pool	Wet	Rain
2022-06-05	Barbourula	busuangensis		No	Blue	20:21:00	34	Juvenile	5	Unknown	No	SR: 12º12’13” N 119º55’12” E	Margin pool	Wet	Rain
2022-06-05	Barbourula	busuangensis		No	Blue	20:21:00	31.1	Juvenile	3	Unknown	No	SR: 12º12’13” N 119º55’12” E	Margin pool	Wet	Rain
2022-06-05	Barbourula	busuangensis		No	Blue	20:24:00	30.8	Juvenile	4	Unknown	No	SR: 12º12’13” N 119º55’12” E	Margin pool	Wet	Rain
2022-06-05	Barbourula	busuangensis	0007D60F36	No		20:30:00	83	Adult	82	Unknown	No	SR: 12º12’13” N 119º55’12” E	Margin pool	Wet	Rain
2022-06-05	Barbourula	busuangensis	0007D5D139	No		20:30:00	82.1	Adult	86	Unknown	No	SR: 12º11’42” N 119º54’58” E	Margin pool	Wet	Rain
2022-06-05	Barbourula	busuangensis	0007D3BD52	YES		20:30:00	69.1	Adult	55	Unknown	No	SR: 12º11’42” N 119º54’58” E	On rock	Wet	Rain
2022-06-05	Barbourula	busuangensis		No	Blue	20:30:00	32.2	Juvenile	19	Unknown	No	SR: 12º12’13” N 119º55’14” E	On rock	Wet	Rain
2022-06-05	Barbourula	busuangensis	0007D5D7F0	YES		20:30:00	39.1	Subadult	23	Unknown	No	SR: 12º12’13” N 119º55’14” E	On rock	Wet	Rain
2022-06-05	Barbourula	busuangensis	0007D2D327	YES		20:33:00	42	Subadult	33	Unknown	No	SR: 12º12’13” N 119º55’14” E	Entrance of rock	Wet	Rain
2022-06-05	Barbourula	busuangensis	0007D3DE9B	YES		20:38:00	70.5	Adult	61	Unknown	No	SR: 12º12’13” N 119º55’14” E	On rock	Wet	Rain
2022-06-05	Barbourula	busuangensis		No	Blue	20:38:00	27.1	Juvenile	16	Unknown	No	SR: 12º12’13” N 119º55’13” E	On rock	Wet	Rain
2022-06-05	Barbourula	busuangensis	0007D32E33	No		20:38:00	76.8	Adult	75	Unknown	No	SR: 12º12’13” N 119º55’13” E	Margin pool	Wet	Rain
2022-06-05	Barbourula	busuangensis	0007D5B7CF	YES		20:42:00	70.2	Adult	73	Unknown	No	SR: 12º12’13” N 119º55’13” E	Margin pool	Wet	Rain
2022-06-05	Barbourula	busuangensis		No	Blue	20:42:00	25.2	Juvenile	5	Unknown	No	SR: 12º12’13” N 119º55’15” E	Entrance of rock	Wet	Rain
2022-06-05	Barbourula	busuangensis	0007D61DE8	No		20:45:00	59.5	Adult	41	Unknown	No	SR: 12º12’13” N 119º55’13” E	Margin pool	Wet	Rain
2022-06-05	Barbourula	busuangensis		No	Blue	20:45:00	28.2	Juvenile	5	Unknown	No	SR: 12º12’14” N 119º55’13” E	On rock	Wet	Rain
2022-06-05	Barbourula	busuangensis	0007D5D3B2	No		20:46:00	57.8	Adult	46	Unknown	No	SR: 12º12’14” N 119º55’13” E	Margin pool	Wet	Rain
2022-06-05	Barbourula	busuangensis	0007D5D933	YES		20:46:00	48.1	Subadult	30	Unknown	No	SR: 12º12’14” N 119º55’14” E	Margin pool	Wet	Rain
2022-06-05	Barbourula	busuangensis	0007D5E6A4	No		20:51:00	73.1	Adult	69	Unknown	No	SR: 12º12’14” N 119º55’14” E	Margin pool	Wet	Rain
2022-06-05	Barbourula	busuangensis	0007D3ADF6	YES		20:51:00	41.1	Subadult	27	Unknown	No	SR: 12º12’14” N 119º55’14” E	Margin pool	Wet	Rain
2022-06-05	Barbourula	busuangensis	0007D5D57F	No		20:55:00	55.2	Adult	35	Unknown	No	SR: 12º12’14” N 119º55’14” E	On rock	Wet	Rain
2022-06-05	Barbourula	busuangensis	0007D2CB88	YES		20:55:00	45.1	Subadult	24	Unknown	No	SR: 12º12’15” N 119º55’14” E	On rock	Wet	Rain
2022-06-05	Barbourula	busuangensis	0007D47D80	No		20:55:00	47.2	Subadult	30	Unknown	No	SR: 12º12’15” N 119º55’14” E	On rock	Wet	Rain
2022-06-05	Barbourula	busuangensis	0007D5DFB0	No		20:57:00	40.1	Subadult	20	Unknown	No	SR: 12º12’15” N 119º55’14” E	Margin pool	Wet	Rain
2022-06-05	Barbourula	busuangensis	0007D5EB7C	No		20:57:00	69	Adult	32	Female	Gravid	SR: 12º12’15” N 119º55’14” E	Margin pool	Wet	Rain
2022-06-05	Barbourula	busuangensis	0007D5EAE2	No		20:58:00	75.8	Adult	71	Female	Gravid	SR: 12º12’15” N 119º55’14” E	On rock	Wet	Rain
2022-06-05	Barbourula	busuangensis	0007D5C4AD	No		21:01:00	53.7	Adult	40	Unknown	No	SR: 12º12’15” N 119º55’14” E	On rock	Wet	Rain
2022-06-05	Barbourula	busuangensis	0007D5E436	No		21:04:00	48.6	Subadult	31	Unknown	No	SR: 12º12’15” N 119º55’14” E	Entrance of rock	Wet	Rain
2022-06-05	Barbourula	busuangensis	0007D5E582	No		21:04:00	64.5	Adult	60	Unknown	No	SR: 12º12’15” N 119º55’13” E	Small pool	Wet	Rain
2022-06-05	Barbourula	busuangensis	0007D5E7F0	YES		21:06:00	54.1	Adult	37	Unknown	No	SR: 12º12’15” N 119º55’13” E	Margin pool	Wet	Rain
2022-06-05	Barbourula	busuangensis	0007D5D87F	YES		21:06:00	65.2	Adult	70	Female	Gravid	SR: 12º12’16” N 119º55’14” E	Margin pool	Wet	Rain
2022-06-05	Barbourula	busuangensis		YES	Blue	21:08:00	28.6	Juvenile	12	Unknown	No	SR: 12º12’16” N 119º55’14” E	Margin pool	Wet	Rain
2022-06-05	Barbourula	busuangensis	0007D3571B	YES		21:08:00	44.7	Subadult	30	Unknown	No	SR: 12º12’16” N 119º55’14” E	Margin pool	Wet	Rain
2022-06-05	Barbourula	busuangensis	0007D31B91	YES		21:08:00	74.1	Adult	32	Female	Gravid	SR: 12º12’16” N 119º55’14” E	Margin pool	Wet	Rain
2022-06-05	Barbourula	busuangensis	0007D5B2B6	YES		21:11:00	70.5	Adult	74	Female	Gravid	SR: 12º12’16” N 119º55’14” E	Small pool	Wet	Rain
2022-06-05	Barbourula	busuangensis	0007D4871C	YES		21:15:00	43.1	Subadult	32	Unknown	No	SR: 12º12’16” N 119º55’15” E	On rock	Wet	Rain
2022-06-05	Barbourula	busuangensis	0007D5D3A5	No		21:21:00	85.2	Adult	81	Female	Gravid	SR: 12º12’17” N 119º55’16” E	Margin pool	Wet	Rain
2022-06-05	Barbourula	busuangensis	0007D5E958	No		21:23:00	74.6	Adult	76	Unknown	No	SR: 12º12’17” N 119º55’15” E	Small pool	Wet	Rain
2022-06-05	Barbourula	busuangensis	0007D3AF1A	No		21:23:00	81.6	Adult	65	Unknown	No	SR: 12º12’17” N 119º55’15” E	Small pool	Wet	Rain
2022-06-05	Barbourula	busuangensis	0007D5E629	No		21:23:00	57.2	Adult	40	Unknown	No	SR: 12º12’17” N 119º55’15” E	Small pool	Wet	Rain
2022-06-05	Barbourula	busuangensis	0007D3927C	YES		21:27:00	83.5	Adult	100	Unknown	No	SR: 12º12’17” N 119º55’15” E	Big pool	Wet	Rain
2022-06-05	Barbourula	busuangensis	0007D5DCCD	No		21:27:00	74.4	Adult	70	Unknown	No	SR: 12º12’18” N 119º55’16” E	On rock	Wet	Rain
2022-06-05	Barbourula	busuangensis		YES	Yellow	21:30:00	14.9	Juvenile	0	Unknown	No	SR: 12º12’18” N 119º55’16” E	Inside cave	Wet	Rain
2022-06-05	Barbourula	busuangensis		No		21:30:00	13.2	Juvenile	0	Unknown	No	SR: 12º12’19” N 119º55’16” E	Inside cave	Wet	Rain
2022-06-05	Barbourula	busuangensis		No		21:30:00	15.7	Juvenile	0	Unknown	No	SR: 12º12’19” N 119º55’16” E	Inside cave	Wet	Rain
2022-06-10	Barbourula	busuangensis		No		20:23:00	46.5	Subadult	16	Unknown	No	Bulalacao Falls	Entrance of rock	Wet	Dry
2022-06-10	Barbourula	busuangensis		No		21:00:00	46	Subadult	22	Unknown	No	Bulalacao Falls	Entrance of rock	Wet	Dry
2022-06-10	Barbourula	busuangensis		No		21:37:00	32.4	Juvenile	10	Unknown	No	Bulalacao Falls	On rock	Wet	Dry
2022-06-14	Barbourula	busuangensis		No		21:25:00	36.1	Juvenile	7	Unknown	No	Salakot Falls	On rock	Wet	Dry
2022-06-14	Barbourula	busuangensis		No		22:12:00	30	Juvenile	5	Unknown	No	Salakot Falls	On rock	Wet	Dry
2022-06-14	Barbourula	busuangensis		No		22:34:00	36	Juvenile	7	Unknown	No	Salakot Falls	Entrance of rock	Wet	Dry
2022-06-14	Barbourula	busuangensis		No		22:41:00	33.8	Juvenile	4	Unknown	No	Salakot Falls	On rock	Wet	Dry
2022-06-14	Barbourula	busuangensis		No		23:11:00	27.3	Juvenile	3	Unknown	No	Salakot Falls	On rock	Wet	Dry
2022-06-14	Barbourula	busuangensis		No		23:35:00	36.6	Subadult	6	Unknown	No	Salakot Falls	On rock	Wet	Dry
2022-06-14	Barbourula	busuangensis		No		23:40:00	31.6	Juvenile	4	Unknown	No	Salakot Falls	On rock	Wet	Dry
2022-06-14	Barbourula	busuangensis		No		1 day, 0:00:00	36.8	Subadult	9	Unknown	No	Salakot Falls	On rock	Wet	Dry
2022-06-14	Barbourula	busuangensis		No		1 day, 0:10:00	34.1	Juvenile	6	Unknown	No	Salakot Falls	On rock	Wet	Dry
2022-06-14	Barbourula	busuangensis		No		1 day, 0:20:00	29.4	Juvenile	4	Unknown	No	Salakot Falls	On rock	Wet	Dry
2022-06-16	Barbourula	busuangensis		No		20:31:00	35.2	Subadult	7	Unknown	No	Simpocan Falls	Entrance of rock	Wet	Dry
2022-06-16	Barbourula	busuangensis		No		21:51:00	66.7	Adult	55	Unknown	No	Simpocan Falls	Margin pool	Wet	Dry
2022-06-16	Barbourula	busuangensis		No		22:00:00	32.6	Juvenile	8	Unknown	No	Simpocan Falls	Margin pool	Wet	Dry
2022-06-16	Barbourula	busuangensis		No		22:11:00	35.2	Subadult	5	Unknown	No	Simpocan Falls	On rock	Wet	Dry
2022-06-16	Barbourula	busuangensis		No		23:00:00	36.5	Subadult	12	Unknown	No	Simpocan Falls	Margin pool	Wet	Dry
2022-06-16	Barbourula	busuangensis		No		23:00:00	23.8	Juvenile	5	Unknown	No	Simpocan Falls	Margin pool	Wet	Dry
2022-06-20	Barbourula	busuangensis		No	Yellow	18:51:00	13.8	Juvenile	0	Unknown	No	(A) 30m	Margin pool	Wet	Rain
2022-06-20	Barbourula	busuangensis		YES	Yellow	18:51:00	13.9	Juvenile	0	Unknown	No	(A) 30m	Margin pool	Wet	Rain
2022-06-20	Barbourula	busuangensis		No	Yellow	18:51:00	12.7	Juvenile	0	Unknown	No	(A) 30m	Margin pool	Wet	Rain
2022-06-20	Barbourula	busuangensis	0007E54A85	YES		18:55:00	44	Subadult	13	Unknown	No	(A) 50-60m	Entrance of rock	Wet	Rain
2022-06-20	Barbourula	busuangensis	0007D48482	YES		18:55:00	40.4	Subadult	10	Unknown	No	(A) 50-60m	Margin pool	Wet	Rain
2022-06-20	Barbourula	busuangensis	0007D2CA3B	YES		19:16:00	35.5	Subadult	10	Unknown	No	(B) 60m	Margin pool	Wet	Rain
2022-06-20	Barbourula	busuangensis	0007D5E88D	YES		19:19:00	44.1	Subadult	12	Unknown	No	(B)80m	Small pool	Wet	Rain
2022-06-20	Barbourula	busuangensis	0007D5E8F5	No		19:27:00	50	Adult	19	Unknown	No	(C) 50m	Entrance of rock	Wet	Rain
2022-06-20	Barbourula	busuangensis	0007D2CEE6	YES		19:39:00	43.1	Subadult	14	Unknown	No	(C)120m	Margin pool	Wet	Rain
2022-06-20	Barbourula	busuangensis	0007D5FA55	YES		19:41:00	85.6	Adult	58	Unknown	No	(C) 130m	On rock	Wet	Rain
2022-06-20	Barbourula	busuangensis	0007D5DB13	YES		19:50:00	71.6	Adult	50	Unknown	No	(C) 180-190m	Small pool	Wet	Rain
2022-06-20	Barbourula	busuangensis		No	Yellow	19:57:00	12.4	Juvenile	0	Unknown	No	(C) 220m	Margin pool	Wet	Rain
2022-06-20	Barbourula	busuangensis	0007D5D0E1	No		19:58:00	35.9	Subadult	7	Unknown	No	(C) 220m	Margin pool	Wet	Rain
2022-06-20	Barbourula	busuangensis	0007D619B5	No		20:01:00	38.3	Subadult	7	Unknown	No	(C) 210-220m	Small pool	Wet	Rain
2022-06-25	Barbourula	busuangensis		YES	Blue	19:07:00	30.5	Juvenile	4	Unknown	No	(A) 30m	Margin pool	Wet	Rain
2022-06-25	Barbourula	busuangensis	0007D48482	YES		19:11:00	40.1	Subadult	11	Unknown	No	(A) 50-60m	Margin pool	Wet	Rain
2022-06-25	Barbourula	busuangensis	0007D5D3CC	No		19:18:00	38.1	Subadult	6	Unknown	No	(B) 0m	Entrance of rock	Wet	Rain
2022-06-25	Barbourula	busuangensis		No	Blue	19:18:00	26.1	Juvenile	2	Unknown	No	(B) 0m	Margin pool	Wet	Rain
2022-06-25	Barbourula	busuangensis	0007D2CA3B	YES		19:24:00	36.1	Subadult	9	Unknown	No	(B) 50-60m	Margin pool	Wet	Rain
2022-06-25	Barbourula	busuangensis	0007D5E88D	YES		19:29:00	43.1	Subadult	14	Unknown	No	(B)80m	Small pool	Wet	Rain
2022-06-25	Barbourula	busuangensis		No	Blue	19:39:00	30.5	Juvenile	3	Unknown	No	(C) 60-70m	Margin pool	Wet	Rain
2022-06-25	Barbourula	busuangensis	0007D5E127	YES		19:46:00	45.2	Subadult	14	Unknown	No	(C)110m	Entrance of rock	Wet	Rain
2022-06-25	Barbourula	busuangensis	0007D2DC67	YES		19:51:00	78.2	Adult	53	Unknown	No	(C)140m	Big pool	Wet	Rain
2022-06-25	Barbourula	busuangensis	0007D5FC98	YES		19:53:00	50.1	Adult	20	Unknown	No	(C)150m	Entrance of rock	Wet	Rain
2022-06-25	Barbourula	busuangensis	0007D5DB13	YES		19:59:00	72.7	Adult	55	Unknown	No	(C)190m	Small pool	Wet	Rain
2022-06-25	Barbourula	busuangensis		YES	Blue	19:59:00	34.3	Juvenile	5	Unknown	No	(C)190-200m	Margin pool	Wet	Rain
2022-06-25	Barbourula	busuangensis		YES	Blue	20:03:00	22.4	Juvenile	1	Unknown	No	(C)200-210m	On rock	Wet	Rain
2022-06-25	Barbourula	busuangensis	0007D5D776	No		20:08:00	40.3	Subadult	9	Unknown	No	(C)220m	Small pool	Wet	Rain
2022-06-25	Barbourula	busuangensis	0007D5F436	No		20:09:00	89.4	Adult	100	Unknown	No	(C)220m	On rock	Wet	Rain
2022-06-25	Barbourula	busuangensis	0007D2E94B	No		20:09:00	75.6	Adult	32	Unknown	No	(C)220m	On rock	Wet	Rain
2022-06-25	Barbourula	busuangensis	0007D5E736	No		20:12:00	75.7	Adult	50	Unknown	No	(C)220m	On rock	Wet	Rain
2022-06-25	Barbourula	busuangensis	0007D61730	No		20:12:00	73.6	Adult	55	Unknown	No	(C)220m	On rock	Wet	Rain
2022-06-25	Barbourula	busuangensis	0007D5CF96	No		20:12:00	70	Adult	50	Unknown	No	(C) 220m	On rock	Wet	Rain
2022-07-04	Barbourula	busuangensis	0007E54A85	YES		19:01:00	44.1	Subadult	16	Unknown	No	(A) 50m	Rock cave	Wet	Rain
2022-07-04	Barbourula	busuangensis	0007D48482	YES		19:03:00	40.7	Subadult	12	Unknown	No	(A) 50-60m	Margin pool	Wet	Rain
2022-07-04	Barbourula	busuangensis	0007D5FFFA	No		19:20:00	62.9	Adult	40	Unknown	No	(C) 10-20m	Rock cave	Wet	Rain
2022-07-04	Barbourula	busuangensis		YES	Blue	19:27:00	30.1	Juvenile	5	Unknown	No	(C) 60-70m	Margin pool	Wet	Rain
2022-07-04	Barbourula	busuangensis	0007D5F116	No		19:29:00	78.3	Adult	68	Unknown	No	(C) 70m	On rock	Wet	Rain
2022-07-04	Barbourula	busuangensis	0007D5FA8F	No		19:33:00	88.9	Adult	100	Unknown	No	(C) 90m	Entrance of rock	Wet	Rain
2022-07-04	Barbourula	busuangensis	0007D5EA75	No		19:36:00	42.1	Subadult	10	Unknown	No	(C) 100-110m	Margin pool	Wet	Rain
2022-07-04	Barbourula	busuangensis		No		19:42:00	32.6	Juvenile	7	Unknown	No	(C) 120-130m	Margin pool	Wet	Rain
2022-07-04	Barbourula	busuangensis		No		19:47:00	27.4	Juvenile	4	Unknown	No	(C) 150-160m	Entrance of rock	Wet	Rain
2022-07-04	Barbourula	busuangensis	0007D2C636	No		19:52:00	89.9	Adult	100	Unknown	No	(C) 160-170m	On rock	Wet	Rain
2022-07-04	Barbourula	busuangensis		No		19:52:00	28.8	Juvenile	5	Unknown	No	(C) 160-170m	On rock	Wet	Rain
2022-07-04	Barbourula	busuangensis	0007D5DC11	No		19:52:00	78.6	Adult	36	Unknown	No	(C) 160-170m	On rock	Wet	Rain
2022-07-04	Barbourula	busuangensis	0007D5D0E1	YES		19:52:00	35.1	Subadult	11	Unknown	No	(C) 160-170m	On rock	Wet	Rain
2022-07-04	Barbourula	busuangensis	0007D34CD1	YES		19:55:00	52.5	Adult	22	Unknown	No	(C) 170m	On rock	Wet	Rain
2022-07-04	Barbourula	busuangensis	0007D3367E	YES		19:55:00	55.1	Adult	25	Unknown	No	(C) 170m	On rock	Wet	Rain
2022-07-04	Barbourula	busuangensis	0007D5D8F8	No		20:01:00	93.4	Adult	100	Unknown	No	(C) 200-210m	Entrance of rock	Wet	Rain
2022-07-04	Barbourula	busuangensis	0007D615B4	No		20:10:00	62.1	Adult	40	Unknown	No	(C)220m	On rock	Wet	Rain
2022-07-06	Barbourula	busuangensis	0007D48713	No		20:51:00	59.4	Adult	44	Unknown	No	SR: 12º12’12” N 119º55’9” E	Margin pool	Wet	Rain
2022-07-06	Barbourula	busuangensis	0007D5D13F	No		20:53:00	61	Adult	48	Unknown	No	SR: 12º12’12” N 119º55’9” E	On rock	Wet	Rain
2022-07-06	Barbourula	busuangensis	0007D2D5C4	YES		20:55:00	60.6	Adult	36	Unknown	No	SR: 12º12’12” N 119º55’9” E	Margin pool	Wet	Rain
2022-07-06	Barbourula	busuangensis	0007D5D3A8	YES		20:55:00	68.7	Adult	49	Unknown	No	SR: 12º12’12” N 119º55’9” E	On rock	Wet	Rain
2022-07-06	Barbourula	busuangensis	0007D5FB01	No		20:57:00	64	Adult	68	Unknown	No	SR: 12º12’12” N 119º55’9” E	On rock	Wet	Rain
2022-07-06	Barbourula	busuangensis	0007D61333	No		20:59:00	85.7	Adult	72	Unknown	No	SR: 12º12’12” N 119º55’10” E	Small pool	Wet	Rain
2022-07-06	Barbourula	busuangensis	0007D39D53	No		21:00:00	38.5	Subadult	8	Unknown	No	SR: 12º12’12” N 119º55’10” E	On rock	Wet	Rain
2022-07-06	Barbourula	busuangensis	0007D5CD6A	No		21:00:00	35	Subadult	9	Unknown	No	SR: 12º12’12” N 119º55’10” E	On rock	Wet	Rain
2022-07-06	Barbourula	busuangensis	0007D5DD04	YES		21:02:00	60.5	Adult	44	Unknown	No	SR: 12º12’13” N 119º55’11” E	On rock	Wet	Rain
2022-07-06	Barbourula	busuangensis		No	Blue	21:05:00	32.5	Juvenile	7	Unknown	No	SR: 12º12’12” N 119º55’11” E	On rock	Wet	Rain
2022-07-06	Barbourula	busuangensis	0007D60AC7	YES		21:05:00	54.1	Adult	30	Unknown	No	SR: 12º12’12” N 119º55’12” E	Margin pool	Wet	Rain
2022-07-06	Barbourula	busuangensis	0007E4C965	YES		21:08:00	70.5	Adult	52	Unknown	No	SR: 12º12’12” N 119º55’12” E	On rock	Wet	Rain
2022-07-06	Barbourula	busuangensis	0007D35B1F	No		21:16:00	50.3	Adult	20	Unknown	No	SR: 12º12’11” N 119º55’12” E	On rock	Wet	Rain
2022-07-06	Barbourula	busuangensis	0007D60203	YES		21:16:00	52.2	Adult	24	Unknown	No	SR: 12º12’11” N 119º55’12” E	On rock	Wet	Rain
2022-07-06	Barbourula	busuangensis	0007D39F08	No		21:18:00	90.5	Adult	100	Unknown	No	SR: 12º12’12” N 119º55’13” E	On rock	Wet	Rain
2022-07-06	Barbourula	busuangensis	0007D5FE71	YES		21:20:00	79.3	Adult	75	Unknown	No	SR: 12º12’12” N 119º55’13” E	Margin pool	Wet	Rain
2022-07-06	Barbourula	busuangensis	0007D313DE	YES		21:22:00	57.3	Adult	30	Unknown	No	SR: 12º12’13” N 119º55’13” E	Margin pool	Wet	Rain
2022-07-06	Barbourula	busuangensis	0007E98035	No		21:27:00	70.4	Adult	67	Unknown	No	SR: 12º12’13” N 119º55’12” E	On rock	Wet	Rain
2022-07-06	Barbourula	busuangensis	0007D6217E	No		21:29:00	77.4	Adult	78	Unknown	No	SR: 12º12’13” N 119º55’12” E	Margin pool	Wet	Rain
2022-07-06	Barbourula	busuangensis	0007D5D7F0	YES		21:30:00	42.8	Subadult	13	Unknown	No	SR: 12º12’13” N 119º55’13” E	On rock	Wet	Rain
2022-07-06	Barbourula	busuangensis	0007D2D327	YES		21:30:00	43.1	Subadult	14	Unknown	No	SR: 12º12’13” N 119º55’13” E	On rock	Wet	Rain
2022-07-06	Barbourula	busuangensis	0007D5F795	No		21:30:00	49.9	Subadult	5	Unknown	No	SR: 12º12’13” N 119º55’13” E	margin pool	Wet	Rain
2022-07-06	Barbourula	busuangensis	0007D32E33	YES		21:34:00	73	Adult	67	Unknown	No	SR: 12º12’13” N 119º55’13” E	margin pool	Wet	Rain
2022-07-06	Barbourula	busuangensis		No	Blue	21:35:00	25.4	Juvenile	3	Unknown	No	SR: 12º12’13” N 119º55’13” E	On rock	Wet	Rain
2022-07-06	Barbourula	busuangensis	0007D32B6D	No		21:35:00	37.1	Subadult	9	Unknown	No	SR: 12º12’13” N 119º55’13” E	On rock	Wet	Rain
2022-07-06	Barbourula	busuangensis	0007D5E531	No		21:42:00	82.4	Adult	81	Unknown	No	SR: 12º12’13” N 119º55’14” E	Small pool	Wet	Rain
2022-07-06	Barbourula	busuangensis	0007D604DB	No		21:42:00	47.6	Subadult	21	Unknown	No	SR: 12º12’13” N 119º55’14” E	On rock	Wet	Rain
2022-07-06	Barbourula	busuangensis	0007D5D57F	YES		21:42:00	54.4	Adult	30	Unknown	No	SR: 12º12’13” N 119º55’14” E	On rock	Wet	Rain
2022-07-06	Barbourula	busuangensis	0007D47D80	YES		21:45:00	49.2	Subadult	24	Unknown	No	SR: 12º12’13” N 119º55’14” E	Margin pool	Wet	Rain
2022-07-06	Barbourula	busuangensis	0007D5FA0D	No		21:49:00	73.5	Adult	78	Unknown	No	SR: 12º12’13” N 119º55’14” E	Entrance of rock	Wet	Rain
2022-07-06	Barbourula	busuangensis	0007D2B86F	YES		21:49:00	53.8	Adult	28	Unknown	No	SR: 12º12’16” N 119º55’14” E	On rock	Wet	Rain
2022-07-06	Barbourula	busuangensis	0007E0DD2C	No		21:49:00	57.3	Adult	13	Unknown	No	SR: 12º12’15” N 119º55’14” E	On rock	Wet	Rain
2022-07-06	Barbourula	busuangensis	0007D5E582	YES		21:49:00	59.7	Adult	45	Unknown	No	SR: 12º12’15” N 119º55’14” E	On rock	Wet	Rain
2022-07-06	Barbourula	busuangensis	0007D2C3B0	No		21:51:00	72.6	Adult	59	Unknown	No	SR: 12º12’15” N 119º55’14” E	On rock	Wet	Rain
2022-07-06	Barbourula	busuangensis	0007D2C612	No		21:51:00	74	Adult	64	Unknown	No	SR: 12º12’15” N 119º55’14” E	On rock	Wet	Rain
2022-07-06	Barbourula	busuangensis	0007DEB394	No		21:51:00	60.5	Adult	44	Unknown	No	SR: 12º12’16” N 119º55’14” E	On rock	Wet	Rain
2022-07-06	Barbourula	busuangensis	0007D35AE4	No		21:56:00	71.3	Adult	50	Unknown	No	SR: 12º12’16” N 119º55’14” E	On rock	Wet	Rain
2022-07-06	Barbourula	busuangensis	0007D5F184	YES		21:59:00	67.2	Adult	45	Female	Gravid	SR: 12º12’17” N 119º55’15” E	On rock	Wet	Rain
2022-07-06	Barbourula	busuangensis	0007D62890	No		22:01:00	78.7	Adult	67	Female	Gravid	SR: 12º12’17” N 119º55’15” E	On rock	Wet	Rain
2022-07-06	Barbourula	busuangensis	0007DEB471	No		22:01:00	49.5	Subadult	19	Unknown	No	SR: 12º12’17” N 119º55’15” E	On rock	Wet	Rain
2022-07-06	Barbourula	busuangensis	0007DF1DE0	No		22:02:00	80.5	Adult	82	Unknown	No	SR: 12º12’17” N 119º55’15” E	On rock	Wet	Rain
2022-07-06	Barbourula	busuangensis	0007D2BFAB	No		22:04:00	68.1	Adult	51	Unknown	No	SR: 12º12’17” N 119º55’15” E	On rock	Wet	Rain
2022-07-06	Barbourula	busuangensis	0007D2ABA4	No		22:04:00	75.1	Adult	68	Unknown	No	SR: 12º12’17” N 119º55’15” E	Big pool	Wet	Rain
2022-07-06	Barbourula	busuangensis	0007DEB2FA	No		22:04:00	76.5	Adult	67	Unknown	No	SR: 12º12’17” N 119º55’15” E	Margin pool	Wet	Rain
2022-07-06	Barbourula	busuangensis	0007DECD2C	No		22:09:00	73.7	Adult	70	Female	Gravid	SR: 12º12’17” N 119º55’16” E	On rock	Wet	Rain
2022-07-06	Barbourula	busuangensis	0007E0D1FC	No		22:11:00	81.8	Adult	84	Unknown	No	SR: 12º12’17” N 119º55’16” E	On rock	Wet	Rain
2022-07-06	Barbourula	busuangensis	0007D5DCCD	YES		22:12:00	75.1	Adult	69	Unknown	No	SR: 12º12’19” N 119º55’16” E	Margin pool	Wet	Rain
2022-07-06	Barbourula	busuangensis	0007DEBC8D	No		22:15:00	81.6	Adult	83	Unknown	No	SR: 12º12’19” N 119º55’16” E	On rock	Wet	Rain
2022-07-06	Barbourula	busuangensis	0007D5D3BC	No		22:16:00	81.4	Adult	80	Unknown	No	SR: 12º12’19” N 119º55’16” E	Big pool	Wet	Rain
2022-07-06	Barbourula	busuangensis	0007E53983	No		22:16:00	75.7	Adult	65	Female	Gravid	SR: 12º12’19” N 119º55’16” E	On rock	Wet	Rain
2022-07-06	Barbourula	busuangensis		YES	Yellow	22:16:00	17	Juvenile	0	Unknown	No	SR: 12º12’19” N 119º55’16” E	Cave in rock	Wet	Rain
2022-07-08	Barbourula	busuangensis	0007D48482	YES		19:33:00	40.4	Subadult	12	Unknown	No	(A) 50-60m	Margin pool	Wet	Rain
2022-07-08	Barbourula	busuangensis		YES	Blue	19:43:00	33.6	Juvenile	7	Unknown	No	(B) 0m	Margin pool	Wet	Rain
2022-07-08	Barbourula	busuangensis	0007D2CA3B	YES		19:51:00	36.1	Subadult	10	Unknown	No	(B) 50-60m	Margin pool	Wet	Rain
2022-07-08	Barbourula	busuangensis	0007D5E7B2	YES		19:53:00	49.1	Subadult	18	Unknown	No	(B) 60m	Margin pool	Wet	Rain
2022-07-08	Barbourula	busuangensis	0007D5E88D	YES		19:56:00	42.5	Subadult	12	Unknown	No	(B) 80m	Small pool	Wet	Rain
2022-07-08	Barbourula	busuangensis	0007DF178F	No		19:59:00	70.3	Adult	73	Unknown	No	(B) 80m - (C) 0m	On rock	Wet	Rain
2022-07-08	Barbourula	busuangensis	0007DF1525	No		20:00:00	63.4	Adult	44	Unknown	No	(B) 80m - (C) 0m	Margin pool	Wet	Rain
2022-07-08	Barbourula	busuangensis	0007D5CEB6	No		20:03:00	58	Adult	29	Unknown	No	(C) 10m	Margin pool	Wet	Rain
2022-07-08	Barbourula	busuangensis	0007DEAF3B	No		20:07:00	54.2	Adult	27	Unknown	No	(C) 20m	Entrance of rock	Wet	Rain
2022-07-08	Barbourula	busuangensis	0007D5FA8F	YES		20:18:00	90.1	Adult	100	Unknown	No	(C) 80-90m	Margin pool	Wet	Rain
2022-07-08	Barbourula	busuangensis	0007DEB547	No		20:19:00	80.9	Adult	100	Unknown	No	(C) 90m	Margin pool	Wet	Rain
2022-07-08	Barbourula	busuangensis	0007D5EDF1	YES		20:22:00	68.6	Adult	46	Unknown	No	(C)110m	Small pool	Wet	Rain
2022-07-08	Barbourula	busuangensis	0007D5F174	YES		20:24:00	41.3	Subadult	15	Unknown	No	(C)110-120m	On rock	Wet	Rain
2022-07-08	Barbourula	busuangensis	0007D5FAE4	YES		20:28:00	61.5	Adult	25	Unknown	No	(C) 130-140m	On rock	Wet	Rain
2022-07-08	Barbourula	busuangensis	0007E0DA76	No		20:36:00	85.1	Adult	72	Unknown	No	(C) 180m	On rock	Wet	Rain
2022-07-08	Barbourula	busuangensis	0007E90138	YES		20:40:00	43.1	Subadult	16	Unknown	No	(C) 200-210m	Margin pool	Wet	Rain
2022-07-08	Barbourula	busuangensis	0007D33212	YES		20:43:00	63.5	Adult	38	Unknown	No	(C) 220m	Big pool	Wet	Rain
2022-07-11	Barbourula	busuangensis	0007E0F0AA	No		18:53:00	75.2	Adult	67	Unknown	No	(A) 50m	Margin pool	Wet	Rain
2022-07-11	Barbourula	busuangensis	0007D5E7B2	YES		19:09:00	49.2	Subadult	20	Unknown	No	(B) 70-80m	Margin pool	Wet	Rain
2022-07-11	Barbourula	busuangensis	0007D33AEC	YES		19:16:00	50.2	Adult	24	Unknown	No	(C) 10m	Entrance of rock	Wet	Rain
2022-07-11	Barbourula	busuangensis	0007E0EFCE	No		19:21:00	36.1	Subadult	6	Unknown	No	(C) 50-60m	On rock	Wet	Rain
2022-07-11	Barbourula	busuangensis	0007D5DCC6	YES		19:30:00	38.1	Subadult	7	Unknown	No	(C)110m	Small pool	Wet	Rain
2022-07-11	Barbourula	busuangensis		YES	Blue	19:34:00	27.8	Juvenile	3	Unknown	No	(C)120m	Margin pool	Wet	Rain
2022-07-11	Barbourula	busuangensis	0007DEBF09	No		19:38:00	68.9	Adult	53	Unknown	No	(C)140m	Entrance of rock	Wet	Rain
2022-07-11	Barbourula	busuangensis	0007D5F114	YES		19:44:00	70.1	Adult	41	Unknown	No	(C) 170-180m	On rock	Wet	Rain
2022-07-11	Barbourula	busuangensis	0007D3367E	YES		19:44:00	55.3	Adult	22	Unknown	No	(C) 170-180m	On rock	Wet	Rain
2022-07-11	Barbourula	busuangensis	0007D2B4F8	No		19:49:00	60.6	Adult	46	Unknown	No	(C)190-200m	On rock	Wet	Rain
2022-07-11	Barbourula	busuangensis		YES	Blue	19:49:00	32.2	Juvenile	6	Unknown	No	(C)190-200m	Margin pool	Wet	Rain
2022-07-11	Barbourula	busuangensis	0007D5ECDE	YES		19:51:00	42.2	Subadult	10	Unknown	No	(C)200-210m	On rock	Wet	Rain
2022-07-11	Barbourula	busuangensis		No		20:17:00	12.7	Juvenile	0	Unknown	No	(C)220m	Margin pool	Wet	Rain
2022-07-11	Barbourula	busuangensis		No		20:17:00	14.2	Juvenile	0	Unknown	No	(C)220m	Margin pool	Wet	Rain
2022-10-23	Barbourula	busuangensis	0007DEC102	No		19:38:00	77.2	Adult	79	Unknown	No	(A) 50m	Margin pool	Wet	Rain
2022-10-23	Barbourula	busuangensis	0007D5D0E1	YES		19:42:00	40.2	Subadult	14	Unknown	No	(A) 70m	On rock	Wet	Rain
2022-10-23	Barbourula	busuangensis	0007DEB547	YES		19:54:00	82.1	Adult	100	Unknown	No	(B) 0m	Entrance of rock	Wet	Rain
2022-10-23	Barbourula	busuangensis	0007DEAC69	No		20:01:00	43.1	Subadult	14	Unknown	No	(B) 40-50m	Margin pool	Wet	Rain
2022-10-23	Barbourula	busuangensis	0007DEBFF9	No		20:04:00	47.9	Subadult	20	Unknown	No	(B) 50-60m	Margin pool	Wet	Rain
2022-10-23	Barbourula	busuangensis	0007DF1BC8	No		20:33:00	70.2	Adult	46	Unknown	No	(C)100m	Margin pool	Wet	Rain
2022-10-23	Barbourula	busuangensis	0007D5EAE1	No		20:37:00	77.6	Adult	80	Unknown	No	(C)120m	Entrance of rock	Wet	Rain
2022-10-23	Barbourula	busuangensis	0007D2CEE6	YES		20:40:00	51.9	Adult	25	Unknown	No	(C) 120-130m	Margin pool	Wet	Rain
2022-10-23	Barbourula	busuangensis	0007DEB504	No		20:41:00	83.5	Adult	80	Unknown	No	(C) 120-130m	Wall	Wet	Rain
2022-10-23	Barbourula	busuangensis	0007E0EE5F	No		20:42:00	43.1	Subadult	14	Unknown	No	(C) 120-130m	Margin pool	Wet	Rain
2022-10-23	Barbourula	busuangensis	0007D5DEC4	YES		20:43:00	59.2	Adult	31	Unknown	No	(C) 130m	Wall	Wet	Rain
2022-10-23	Barbourula	busuangensis	0007D5EF06	No		20:49:00	77.2	Adult	86	Unknown	No	(C)140m	Rock cave	Wet	Rain
2022-10-23	Barbourula	busuangensis	0007DF1E44	No		20:52:00	63.9	Adult	42	Unknown	No	(C)140-150m	Wall	Wet	Rain
2022-10-23	Barbourula	busuangensis	0007D2CA3B	YES		21:03:00	40.3	Subadult	14	Unknown	No	(C) 150m	Margin pool	Wet	Rain
2022-10-23	Barbourula	busuangensis	0007D5E042	No		21:09:00	78.4	Adult	76	Unknown	No	(C) 160m	Wall	Wet	Rain
2022-10-23	Barbourula	busuangensis	0007D5D9A3	No		21:14:00	67.5	Adult	52	Unknown	No	(C) 180m	Wall	Wet	Rain
2022-10-23	Barbourula	busuangensis		No	Pink	21:17:00	32.9	Juvenile	4	Unknown	No	(C) 180-190m	Margin pool	Wet	Rain
2022-10-27	Barbourula	busuangensis	0007D5E66E	No		18:56:00	85.3	Adult	100	Unknown	No	(A) 30-40m	Rock cave	Wet	Dry
2022-10-27	Barbourula	busuangensis	0007E54A85	YES		19:01:00	50.6	Adult	33	Unknown	No	(A) 60m	On rock	Wet	Dry
2022-10-27	Barbourula	busuangensis	0007D5D8F8	YES		19:07:00	93.4	Adult	100	Unknown	No	(A) 100m	On rock	Wet	Dry
2022-10-27	Barbourula	busuangensis	0007DEB547	YES		19:16:00	85.1	Adult	100	Unknown	No	(B) 10m	Small pool	Wet	Dry
2022-10-27	Barbourula	busuangensis	0007D5E7B2	YES		19:25:00	54.9	Adult	35	Unknown	No	(B) 60m	On rock	Wet	Dry
2022-10-27	Barbourula	busuangensis	0007DF1525	YES		19:34:00	65.6	Adult	54	Unknown	No	(C) 0m	On rock	Wet	Dry
2022-10-27	Barbourula	busuangensis	0007D2E5C7	YES		19:39:00	65.5	Adult	53	Unknown	No	(C) 10-20m	Entrance of rock	Wet	Dry
2022-10-27	Barbourula	busuangensis	0007D5DEF8	No		19:47:00	75.1	Adult	67	Unknown	No	(C) 50-60m	On rock	Wet	Dry
2022-10-27	Barbourula	busuangensis	0007D3BFEA	No		19:52:00	56.7	Adult	35	Unknown	No	(C) 80-90m	Entrance of rock	Wet	Dry
2022-10-27	Barbourula	busuangensis	0007D5FA8F	YES		19:55:00	89.3	Adult	100	Unknown	No	(C) 100m	Entrance of rock	Wet	Dry
2022-10-27	Barbourula	busuangensis	0007D33314	YES		19:59:00	59.5	Adult	38	Unknown	No	(C)110m	On rock	Wet	Dry
2022-10-27	Barbourula	busuangensis	0007D5DCC6	YES		19:59:00	47.2	Subadult	18	Unknown	No	(C)110m	Margin pool	Wet	Dry
2022-10-27	Barbourula	busuangensis	40007DF17A9	No		20:03:00	38.3	Subadult	10	Unknown	No	(C)120m	Margin pool	Wet	Dry
2022-10-27	Barbourula	busuangensis	0007D5EAE1	YES		20:05:00	81.2	Adult	80	Unknown	No	(C) 130m	Margin pool	Wet	Dry
2022-10-27	Barbourula	busuangensis	0007D5DEC4	YES		20:07:00	60	Adult	32	Unknown	No	(C) 130-140m	Rock cave	Wet	Dry
2022-10-27	Barbourula	busuangensis	0007D2CA3B	YES		20:20:00	44.8	Subadult	15	Unknown	No	(C) 150m	Margin pool	Wet	Dry
2022-10-27	Barbourula	busuangensis	0007DEAC11	No		20:20:00	40	Subadult	9	Unknown	No	(C) 150-160m	Small pool	Wet	Dry
2022-10-27	Barbourula	busuangensis	0007E0D4BD	No		20:28:00	79.2	Adult	95	Unknown	No	(C) 170-180m	Rock cave	Wet	Dry
2022-10-27	Barbourula	busuangensis		No	Green	20:36:00	12.2	Juvenile	0	Unknown	No	(C)210m	Margin pool	Wet	Dry
2022-10-27	Barbourula	busuangensis		No	Green	20:40:00	15.9	Juvenile	0	Unknown	No	(C)220m	Margin pool	Wet	Dry
2022-10-27	Barbourula	busuangensis		No		20:44:00	24.6	Juvenile	0	Unknown	No	(C)220m	Margin pool	Wet	Dry
2022-10-27	Barbourula	busuangensis		No	Green	20:44:00	14.7	Juvenile	0	Unknown	No	(C)220m	Margin pool	Wet	Dry
2022-10-27	Barbourula	busuangensis		No	Green	20:44:00	13.2	Juvenile	0	Unknown	No	(C)220m	Margin pool	Wet	Dry
2022-10-27	Barbourula	busuangensis	0007D5D772	No		20:50:00	38.3	Subadult	10	Unknown	No	(C)220m	On rock	Wet	Dry
2022-11-09	Barbourula	busuangensis	0007D2F441	No		18:22:00	71.2	Adult	55	Unknown	No	(A) 50m	Rock	Wet	Dry
2022-11-09	Barbourula	busuangensis		No	Pink	18:28:00	30.2	Juvenile	6	Unknown	No	(A) 70m	Margin pool	Wet	Dry
2022-11-09	Barbourula	busuangensis	0007D5FD67	No		18:32:00	61.6	Adult	45	Unknown	No	(A) 90m	Margin pool	Wet	Dry
2022-11-09	Barbourula	busuangensis	0007D5EB07	No		18:38:00	61.2	Adult	44	Unknown	No	(B) 0m	Small pool	Wet	Dry
2022-11-09	Barbourula	busuangensis		No	Pink	19:01:00	22.2	Juvenile	2	Unknown	No	(B) 80m	Margin pool	Wet	Dry
2022-11-09	Barbourula	busuangensis	0007DEBC6F	No		19:08:00	74.4	Adult	64	Unknown	No	(B) 100m	On rock	Wet	Dry
2022-11-09	Barbourula	busuangensis	0007D39402	YES		19:19:00	68.3	Adult	56	Unknown	No	(C) 30m	On rock	Wet	Dry
2022-11-09	Barbourula	busuangensis	0007D2C630	No		19:35:00	41.6	Subadult	15	Unknown	No	(C) 60-70m	Margin pool	Wet	Dry
2022-11-09	Barbourula	busuangensis	0007D3BFEA	YES		19:39:00	60.1	Adult	33	Unknown	No	(C) 80-90m	On rock	Wet	Dry
2022-11-09	Barbourula	busuangensis	0007D5E127	YES		19:49:00	49	Subadult	26	Unknown	No	(C)110m	Margin pool	Wet	Dry
2022-11-09	Barbourula	busuangensis	0007D5DCC6	YES		19:49:00	47.8	Subadult	20	Unknown	No	(C)110m	Entrance of rock	Wet	Dry
2022-11-09	Barbourula	busuangensis		No	Pink	19:51:00	21.4	Juvenile	2	Unknown	No	(C)110m	Margin pool	Wet	Dry
2022-11-09	Barbourula	busuangensis	0007D5F174	YES		19:53:00	50.2	Adult	24	Unknown	No	(C)110-120m	Small pool	Wet	Dry
2022-11-09	Barbourula	busuangensis	0007D2CEE6	YES		19:55:00	52.3	Adult	27	Unknown	No	(C)120m	Margin pool	Wet	Dry
2022-11-09	Barbourula	busuangensis	0007DEB504	YES		20:02:00	83.7	Adult	83	Unknown	No	(C) 130m	Wall	Wet	Dry
2022-11-09	Barbourula	busuangensis	0007E0F080	No		20:06:00	40	Subadult	11	Unknown	No	(C) 140m	Margin pool	Wet	Dry
2022-11-09	Barbourula	busuangensis	0007D2CA3B	YES		20:11:00	47.1	Subadult	16	Unknown	No	(C) 150m	Margin pool	Wet	Dry
2022-11-09	Barbourula	busuangensis	0007DEB4D6	No		20:17:00	77.2	Adult	62	Unknown	No	(C) 170-180m	Wall	Wet	Dry
2022-11-09	Barbourula	busuangensis	0007D5D9A3	YES		20:20:00	67.4	Adult	45	Unknown	No	(C) 180m	Wall	Wet	Dry
2022-11-09	Barbourula	busuangensis		YES	Pink	20:25:00	32.2	Juvenile	4	Unknown	No	(C) 190m	Margin pool	Wet	Dry
2022-11-09	Barbourula	busuangensis	0007D5D1DB	No		20:28:00	80.6	Adult	79	Unknown	No	(C) 200m	Small pool	Wet	Dry
2022-11-09	Barbourula	busuangensis	0007D619B5	YES		20:31:00	45.6	Subadult	15	Unknown	No	(C) 210m	On rock	Wet	Dry
2022-11-09	Barbourula	busuangensis		No	Pink	20:31:00	20.1	Juvenile	1	Unknown	No	(C) 210m	Small pool	Wet	Dry
2022-11-09	Barbourula	busuangensis		No	Green	20:31:00	33.9	Juvenile	8	Unknown	No	(C) 210m	Margin pool	Wet	Dry
2022-11-09	Barbourula	busuangensis		No	Pink	20:37:00	23.2	Juvenile	1	Unknown	No	(C)220m	Margin pool	Wet	Dry
2022-11-09	Barbourula	busuangensis	0007DF117E	No		20:40:00	73.8	Adult	74	Unknown	No	(C)220m	Wall	Wet	Dry
2022-11-09	Barbourula	busuangensis	0007D2E94B	YES		20:42:00	81.1	Adult	100	Unknown	No	(C)220m	Wall	Wet	Dry
2022-11-12	Barbourula	busuangensis	0007D5DB13	YES		19:16:00	72.5	Adult	65	Unknown	No	(A) 40-50m	Small pool	Wet	Dry
2022-11-12	Barbourula	busuangensis	0007E4C1A4	YES		19:25:00	45.2	Subadult	18	Unknown	No	(B) 0m	On rock	Wet	Dry
2022-11-12	Barbourula	busuangensis	0007DEAC69	YES		19:40:00	43.1	Subadult	10	Unknown	No	(B) 50m	Margin pool	Wet	Dry
2022-11-12	Barbourula	busuangensis	0007DF1525	YES		19:53:00	65.9	Adult	51	Unknown	No	(B) 100m - (C) 0m	On rock	Wet	Dry
2022-11-12	Barbourula	busuangensis		No	Pink	20:01:00	27.8	Juvenile	6	Unknown	No	(C) 20m	Margin pool	Wet	Dry
2022-11-12	Barbourula	busuangensis	0007D3DDD5	YES		20:27:00	45.2	Subadult	16	Unknown	No	(C) 100m	On rock	Wet	Dry
2022-11-12	Barbourula	busuangensis		No	Pink	20:33:00	23.1	Juvenile	1	Unknown	No	(C)110m	Margin pool	Wet	Dry
2022-11-12	Barbourula	busuangensis		YES	Pink	20:33:00	21.3	Juvenile	1	Unknown	No	(C)110m	Margin pool	Wet	Dry
2022-11-12	Barbourula	busuangensis	0007D2CEE6	YES		20:43:00	52.4	Adult	24	Unknown	No	(C)120m	Small pool	Wet	Dry
2022-11-12	Barbourula	busuangensis	0007D39902	No		20:47:00	74	Adult	60	Unknown	No	(C) 130m	On rock	Wet	Dry
2022-11-12	Barbourula	busuangensis	0007D3AD78	YES		20:51:00	66.6	Adult	46	Unknown	No	(C) 140m	Entrance of rock	Wet	Dry
2022-11-12	Barbourula	busuangensis	0007D5F114	YES		21:00:00	72.1	Adult	56	Unknown	No	(C) 170-180m	On rock	Wet	Dry
2022-11-12	Barbourula	busuangensis		No	Green	21:09:00	13.7	Juvenile	0	Unknown	No	(C) 200m	On rock	Wet	Dry
2022-11-12	Barbourula	busuangensis		No	Green	21:15:00	12.6	Juvenile	0	Unknown	No	(C) 200m	On rock	Wet	Dry
2022-11-12	Barbourula	busuangensis		YES	Pink	21:20:00	19.5	Juvenile	0	Unknown	No	(C)210m	Margin pool	Wet	Dry
2022-11-15	Barbourula	busuangensis	0007DF1C9A	No		19:02:00	45.2	Subadult	28	Unknown	No	(A) 40m	Small pool	Wet	Dry
2022-11-15	Barbourula	busuangensis	0007DECF0F	No		19:07:00	45	Subadult	14	Unknown	No	(A) 50m	Margin pool	Wet	Dry
2022-11-15	Barbourula	busuangensis	0007D5D0E1	YES		19:11:00	40.8	Subadult	14	Unknown	No	(A) 80m	On rock	Wet	Dry
2022-11-15	Barbourula	busuangensis	0007D5CAEC	No		19:18:00	48.1	Subadult	10	Unknown	No	(A) 100m - (B) 0m	Margin pool	Wet	Dry
2022-11-15	Barbourula	busuangensis	0007DEAB88	No		19:19:00	86	Adult	100	Unknown	No	(A) 100m - (B) 0m	Entrance of rock	Wet	Dry
2022-11-15	Barbourula	busuangensis	0007D5E863	No		19:38:00	79.9	Adult	81	Unknown	No	(B) 100m	Small pool	Wet	Dry
2022-11-15	Barbourula	busuangensis	0007DECB79	No		19:45:00	62.7	Adult	42	Unknown	No	(C) 0-10m	Entrance of rock	Wet	Dry
2022-11-15	Barbourula	busuangensis		No	Pink	19:49:00	24.3	Juvenile	2	Unknown	No	(C) 20m	Entrance of rock	Wet	Dry
2022-11-15	Barbourula	busuangensis	0007D5E127	YES		20:04:00	49.9	Subadult	26	Unknown	No	(C)110m	On rock	Wet	Dry
2022-11-15	Barbourula	busuangensis		YES	Pink	20:06:00	22.4	Juvenile	1	Unknown	No	(C)100-110m	Margin pool	Wet	Dry
2022-11-15	Barbourula	busuangensis	0007D5DCC6	YES		20:07:00	48.4	Subadult	18	Unknown	No	(C)110m	Margin pool	Wet	Dry
2022-11-15	Barbourula	busuangensis	0007D5F174	YES		20:10:00	50.5	Adult	23	Unknown	No	(C)120m	On rock	Wet	Dry
2022-11-15	Barbourula	busuangensis	0007DF17A9	YES	Blue	20:15:00	38.4	Subadult	10	Unknown	No	(C)120m	Margin pool	Wet	Dry
2022-11-15	Barbourula	busuangensis		No	Pink	20:15:00	22.2	Juvenile	1	Unknown	No	(C)120m	Margin pool	Wet	Dry
2022-11-15	Barbourula	busuangensis	0007D2CEE6	YES		20:15:00	50.5	Adult	24	Unknown	No	(C)120m	Small pool	Wet	Dry
2022-11-15	Barbourula	busuangensis	0007D33089	No		20:18:00	40.2	Subadult	11	Unknown	No	(C) 130m	Small pool	Wet	Dry
2022-11-15	Barbourula	busuangensis	0007DECC30	No		20:22:00	68	Adult	53	Unknown	No	(C) 140m	Wall	Wet	Dry
2022-11-15	Barbourula	busuangensis		No	Pink	20:26:00	31.4	Juvenile	5	Unknown	No	(C) 160m	Margin pool	Wet	Dry
2022-11-15	Barbourula	busuangensis	0007DEB547	YES		20:26:00	85.2	Adult	100	Unknown	No	(C) 160m	Entrance of rock	Wet	Dry
2022-11-15	Barbourula	busuangensis	0007DF1D15	No		20:27:00	35.3	Subadult	8	Unknown	No	(C) 160m	Small pool	Wet	Dry
2022-11-15	Barbourula	busuangensis	0007D5D9A3	YES		20:33:00	64.5	Adult	46	Unknown	No	(C) 180m	Wall	Wet	Dry
2022-11-15	Barbourula	busuangensis	0007DEAC59	No		20:33:00	74.8	Adult	69	Unknown	No	(C) 180m	Margin pool	Wet	Dry
2022-11-15	Barbourula	busuangensis		No	Pink	20:34:00	23.3	Juvenile	1	Unknown	No	(C) 190m	Margin pool	Wet	Dry
2022-11-15	Barbourula	busuangensis		No	Pink	20:38:00	27.2	Juvenile	4	Unknown	No	(C) 190-200m	Margin pool	Wet	Dry
2022-11-15	Barbourula	busuangensis	0007D3045A	No		20:38:00	75.6	Adult	72	Unknown	No	(C) 190-200m	Big pool	Wet	Dry
2022-11-15	Barbourula	busuangensis	0007D38ECF	No		20:38:00	45	Subadult	10	Unknown	No	(C) 190-200m	Margin pool	Wet	Dry
2022-11-15	Barbourula	busuangensis		YES	Pink	20:43:00	20.4	Juvenile	0	Unknown	No	(C) 210m	Margin pool	Wet	Dry
2022-11-15	Barbourula	busuangensis		YES	Green	20:44:00	18.5	Juvenile	0	Unknown	No	(C) 210m	Margin pool	Wet	Dry
2022-11-15	Barbourula	busuangensis		YES	Pink	20:47:00	33	Juvenile	7	Unknown	No	(C) 220m	Margin pool	Wet	Dry
2022-11-18	Barbourula	busuangensis	0007D2AB61	No		20:16:00	82.9	Adult	96	Unknown	No	SR: 12º12’8” N 119º55’6” E	Small pool	Wet	Dry
2022-11-18	Barbourula	busuangensis	0007D2F050	YES		20:26:00	50.6	Adult	28	Unknown	No	SR: 12º12’13” N 119º55’11” E	On rock	Wet	Dry
2022-11-18	Barbourula	busuangensis	0007D2ACAA	No		20:28:00	71.1	Adult	62	Female	Gravid	SR: 12º12’13” N 119º55’11” E	On rock	Wet	Dry
2022-11-18	Barbourula	busuangensis	0007D5DD04	YES		20:29:00	68.2	Adult	66	Unknown	No	SR: 12º12’13” N 119º55’11” E	Margin pool	Wet	Dry
2022-11-18	Barbourula	busuangensis		No	Green	20:34:00	16.2	Juvenile	0	Unknown	No	SR: 12º12’12” N 119º55’12” E	On rock	Wet	Dry
2022-11-18	Barbourula	busuangensis		No	Pink	20:38:00	21.9	Juvenile	1	Unknown	No	SR: 12º12’12” N 119º55’12” E	Margin pool	Wet	Dry
2022-11-18	Barbourula	busuangensis	0007D5FE71	YES		20:44:00	79.5	Adult	84	Unknown	No	SR: 12º12’12” N 119º55’12” E	Small pool	Wet	Dry
2022-11-18	Barbourula	busuangensis	0007D39A55	YES		20:47:00	48.6	Subadult	34	Unknown	No	SR: 12º12’12” N 119º55’12” E	Big pool	Wet	Dry
2022-11-18	Barbourula	busuangensis	0007D5B2B6	YES		20:47:00	70.4	Adult	60	Female	No	SR: 12º12’12” N 119º55’12” E	Big pool	Wet	Dry
2022-11-18	Barbourula	busuangensis	0007D5E552	No		20:51:00	45.8	Subadult	16	Unknown	No	SR: 12º12’13” N 119º55’12” E	Margin pool	Wet	Dry
2022-11-18	Barbourula	busuangensis	0007D2AD2A	No		20:54:00	80.3	Adult	75	Unknown	No	SR: 12º12’13” N 119º55’14” E	Small pool	Wet	Dry
2022-11-18	Barbourula	busuangensis	0007D5D7F0	YES		20:54:00	49.7	Subadult	28	Unknown	No	SR: 12º12’13” N 119º55’14” E	Small pool	Wet	Dry
2022-11-18	Barbourula	busuangensis	0007D2AEA0	No		20:58:00	62.2	Adult	42	Unknown	No	SR: 12º12’13” N 119º55’14” E	On rock	Wet	Dry
2022-11-18	Barbourula	busuangensis	0007D5D139	YES		20:58:00	82.3	Adult	78	Unknown	No	SR: 12º12’13” N 119º55’14” E	Margin pool	Wet	Dry
2022-11-18	Barbourula	busuangensis	0007D2AC76	No		20:58:00	55.5	Adult	30	Unknown	No	SR: 12º12’13” N 119º55’14” E	Margin pool	Wet	Dry
2022-11-18	Barbourula	busuangensis	0007D5E531	YES		21:02:00	82.2	Adult	80	Unknown	No	SR: 12º12’13” N 119º55’14” E	Big pool	Wet	Dry
2022-11-18	Barbourula	busuangensis	0007D2AD71	No		21:05:00	56.8	Adult	34	Unknown	No	SR: 12º12’13” N 119º55’14” E	Entrance of rock	Wet	Dry
2022-11-18	Barbourula	busuangensis	0007D2AC41	No		21:05:00	50	Adult	21	Unknown	No	SR: 12º12’13” N 119º55’14” E	Entrance of rock	Wet	Dry
2022-11-18	Barbourula	busuangensis	0007D2D327	YES		21:08:00	55.1	Adult	30	Unknown	No	SR: 12º12’13” N 119º55’14” E	On rock	Wet	Dry
2022-11-18	Barbourula	busuangensis	0007D2AFA4	No		21:12:00	47.1	Subadult	16	Unknown	No	SR: 12º12’13” N 119º55’12” E	Small pool	Wet	Dry
2022-11-18	Barbourula	busuangensis	0007D2ABB4	No		21:15:00	61	Adult	39	Unknown	No	SR: 12º12’14” N 119º55’12” E	Margin pool	Wet	Dry
2022-11-18	Barbourula	busuangensis	0007D2AD3C	No		21:15:00	59.4	Adult	20	Unknown	No	SR: 12º12’14” N 119º55’12” E	Entrance of rock	Wet	Dry
2022-11-18	Barbourula	busuangensis	0007D41B4B	No		21:21:00	71.6	Adult	74	Unknown	No	SR: 12º12’14” N 119º55’13” E	Big pool	Wet	Dry
2022-11-18	Barbourula	busuangensis	0007D5FA0D	YES		21:24:00	77	Adult	78	Unknown	No	SR: 12º12’15” N 119º55’14” E	Entrance of rock	Wet	Dry
2022-11-18	Barbourula	busuangensis	0007D5C4AD	YES		21:28:00	60.1	Adult	40	Unknown	No	SR: 12º12’16” N 119º55’13” E	Entrance of rock	Wet	Dry
2022-11-18	Barbourula	busuangensis	0007D2AFF3	No		21:37:00	80.9	Adult	82	Unknown	No	SR: 12º12’16” N 119º55’14” E	On rock	Wet	Dry
2022-11-18	Barbourula	busuangensis	0007D2ABA4	YES		21:45:00	75.7	Adult	74	Unknown	No	SR: 12º12’18” N 119º55’13” E	Entrance of rock	Wet	Dry
2022-11-18	Barbourula	busuangensis	0007D2FB82	YES		21:47:00	77.1	Adult	70	Unknown	No	SR: 12º12’17” N 119º55’16” E	Small pool	Wet	Dry
2022-11-18	Barbourula	busuangensis	0007D60906	YES		21:50:00	58.3	Adult	35	Unknown	No	SR: 12º12’18” N 119º55’15” E	Small pool	Wet	Dry
2022-11-18	Barbourula	busuangensis	0007D2AD0A	No		21:52:00	69.6	Adult	39	Unknown	No	SR: 12º12’19” N 119º55’14” E	Wall	Wet	Dry
2022-11-18	Barbourula	busuangensis	0007D5DBE1	YES		21:55:00	84.9	Adult	65	Unknown	No	SR: 12º12’18” N 119º55’16” E	Entrance of rock	Wet	Dry
2022-11-18	Barbourula	busuangensis		No	Pink	21:55:00	21.5	Juvenile	0	Unknown	No	SR: 12º12’18” N 119º55’16” E	Margin pool	Wet	Dry
2022-11-18	Barbourula	busuangensis	0007D2B0D8	No		21:56:00	58.6	Adult	45	Unknown	No	SR: 12º12’19” N 119º55’16” E	Wall	Wet	Dry
2022-11-18	Barbourula	busuangensis	0007D2B09C	No		21:59:00	35.8	Subadult	7	Unknown	No	SR: 12º12’19” N 119º55’16” E	Margin pool	Wet	Dry
2022-11-18	Barbourula	busuangensis		No	Green	21:59:00	10.5	Juvenile	0	Unknown	No	SR: 12º12’19” N 119º55’16” E	Margin pool	Wet	Dry
2022-11-18	Barbourula	busuangensis		No	Green	21:59:00	10.6	Juvenile	0	Unknown	No	SR: 12º12’19” N 119º55’16” E	Margin pool	Wet	Dry
2022-11-18	Barbourula	busuangensis		No	Pink	22:00:00	22.1	Juvenile	0	Unknown	No	SR: 12º12’19” N 119º55’16” E	Wall	Wet	Dry
2022-11-18	Barbourula	busuangensis	0007D2B01B	No		22:00:00	40.9	Subadult	13	Unknown	No	SR: 12º12’19” N 119º55’16” E	Wall	Wet	Dry
2022-11-18	Barbourula	busuangensis		No	Green	22:00:00	11.9	Juvenile	0	Unknown	No	SR: 12º12’19” N 119º55’16” E	Margin pool	Wet	Dry
2022-11-18	Barbourula	busuangensis		No	Green	22:30:00	11.5	Juvenile	0	Unknown	No	SR: 12º12’19” N 119º55’16” E	Margin pool	Wet	Dry
2022-11-18	Barbourula	busuangensis	0007D2AC09	No		22:30:00	79.6	Adult	92	Unknown	No	SR: 12º12’14” N 119º55’16” E	Wall	Wet	Dry
2022-11-18	Barbourula	busuangensis		No	Green	22:30:00	19.3	Juvenile	0	Unknown	No	SR: 12º12’14” N 119º55’16” E	Wall	Wet	Dry
2022-11-18	Barbourula	busuangensis	0007D2AC53	No		23:00:00	60.1	Adult	43	Unknown	No	SR: 12º12’13” N 119º55’12” E	Entrance of rock	Wet	Dry
2022-11-18	Barbourula	busuangensis	0007D2AD24	No		1 day, 0:40:00	46.8	Subadult	14	Unknown	No	SR: 12º12’12” N 119º55’12” E	Margin pool	Wet	Dry
2022-11-18	Barbourula	busuangensis	0007DECD2C	YES		1 day, 0:55:00	74.1	Adult	60	Female	No	SR: 12º12’12” N 119º55’12” E	Big pool	Wet	Dry
2022-11-18	Barbourula	busuangensis	0007D5CDDE	YES		1 day, 0:57:00	75.2	Adult	73	Unknown	No	SR: 12º12’13” N 119º55’11” E	Big pool	Wet	Dry
2022-11-18	Barbourula	busuangensis		No	Green	22:30:00	10.3	Juvenile	0	Unknown	No	SR: 12º12’14” N 119º55’16” E	Cave in rock	Wet	Dry
2022-11-18	Barbourula	busuangensis		No	Green	22:30:00	13.7	Juvenile	0	Unknown	No	SR: 12º12’14” N 119º55’16” E	Cave in rock	Wet	Dry
2022-11-18	Barbourula	busuangensis		No	Green	22:30:00	19.6	Juvenile	0	Unknown	No	SR: 12º12’14” N 119º55’16” E	Wall	Wet	Dry
2022-11-23	Barbourula	busuangensis	0007D2AE02	No		19:18:00	63.7	Adult	45	Unknown	No	(A) 30	On rock	Wet	Dry
2022-11-23	Barbourula	busuangensis	0007D5DB13	YES		19:20:00	73.3	Adult	75	Unknown	No	(A) 40-50m	Small pool	Wet	Dry
2022-11-23	Barbourula	busuangensis	0007DECF0F	YES		19:22:00	45.2	Subadult	15	Unknown	No	(A) 50m	On rock	Wet	Dry
2022-11-23	Barbourula	busuangensis	0007D2B0EE	No		19:29:00	68.2	Adult	52	Unknown	No	(A) 100m - (B) 0m	On rock	Wet	Dry
2022-11-23	Barbourula	busuangensis	0007DEAC69	YES		19:37:00	43.3	Subadult	13	Unknown	No	(B) 50m	On rock	Wet	Dry
2022-11-23	Barbourula	busuangensis	0007D5F116	YES		19:56:00	78.7	Adult	75	Unknown	No	(C) 70m	Wall	Wet	Dry
2022-11-23	Barbourula	busuangensis		No	Pink	19:58:00	32	Juvenile	1	Unknown	No	(C) 70-80m	Margin pool	Wet	Dry
2022-11-23	Barbourula	busuangensis	0007D2B06C	No		20:05:00	70.9	Adult	52	Unknown	No	(C)110m	Wall	Wet	Dry
2022-11-23	Barbourula	busuangensis	0007D2CEE6	YES		20:07:00	52.2	Adult	25	Unknown	No	(C)120m	Small pool	Wet	Dry
2022-11-23	Barbourula	busuangensis	0007D2AFFE	No		20:09:00	84.8	Adult	100	Unknown	No	(C)120m	On rock	Wet	Dry
2022-11-23	Barbourula	busuangensis	0007D4592D	No		20:11:00	64	Adult	38	Unknown	No	(C) 130m	Wall	Wet	Dry
2022-11-23	Barbourula	busuangensis	0007E0F080	YES		20:15:00	40.1	Subadult	9	Unknown	No	(C) 140m	Entrance of rock	Wet	Dry
2022-11-23	Barbourula	busuangensis	0007D2DC67	YES		20:15:00	78.6	Adult	58	Unknown	No	(C) 140m	Wall	Wet	Dry
2022-11-23	Barbourula	busuangensis	0007D2CA3B	YES		20:16:00	47.3	Subadult	15	Unknown	No	(C) 150m	Margin pool	Wet	Dry
2022-11-23	Barbourula	busuangensis	0007D45568	No		20:18:00	95.2	Adult	100	Unknown	No	(C) 160m	Wall	Wet	Dry
2022-11-23	Barbourula	busuangensis		YES	Pink	20:24:00	34	Juvenile	3	Unknown	No	(C) 190-200m	Margin pool	Wet	Dry
2022-11-23	Barbourula	busuangensis		YES	Blue + Pink	20:28:00	33.8	Juvenile	5	Unknown	No	(C) 200-210m	On rock	Wet	Dry
2022-11-28	Barbourula	busuangensis	0007DECF0F	YES		19:19:00	46.1	Subadult	14	Unknown	No	(A) 30-40m	Small pool	Wet	Dry
2022-11-28	Barbourula	busuangensis	0007D2B074	YES	Blue	19:31:00	40.1	Subadult	8	Unknown	No	(B) 0m	Margin pool	Wet	Dry
2022-11-28	Barbourula	busuangensis	0007D2ACB2	No		19:59:00	54.1	Adult	24	Unknown	No	(C) 40m	Entrance of rock	Wet	Dry
2022-11-28	Barbourula	busuangensis		No	Pink	20:07:00	32.2	Juvenile	3	Unknown	No	(C) 80m	Margin pool	Wet	Dry
2022-11-28	Barbourula	busuangensis		No	Pink	20:14:00	23.3	Juvenile	1	Unknown	No	(C)110m	Margin pool	Wet	Dry
2022-11-28	Barbourula	busuangensis	0007D2CEE6	YES		20:18:00	53.6	Adult	23	Unknown	No	(C)120m	Entrance of rock	Wet	Dry
2022-11-28	Barbourula	busuangensis	0007D5EF06	YES		20:21:00	77.5	Adult	86	Unknown	No	(C) 140m	Entrance of rock	Wet	Dry
2022-11-28	Barbourula	busuangensis	0007D2CA3B	YES		20:25:00	47.2	Subadult	14	Unknown	No	(C) 150m	On rock	Wet	Dry
2022-11-28	Barbourula	busuangensis		No	Pink	20:29:00	25.1	Juvenile	2	Unknown	No	(C) 170m	On rock	Wet	Dry
2022-11-28	Barbourula	busuangensis	0007D2AC57	No		20:30:00	47	Subadult	19	Unknown	No	(C) 170-180m	On rock	Wet	Dry
2022-11-28	Barbourula	busuangensis	0007D46490	No		20:35:00	76.7	Adult	78	Unknown	No	(C) 180-190m	Rock cave	Wet	Dry
2022-11-28	Barbourula	busuangensis		YES	Blue + Pink	20:39:00	32.6	Juvenile	5	Unknown	No	(C) 200-210m	Margin pool	Wet	Dry
2022-11-28	Barbourula	busuangensis	0007E0D4BD	YES		20:47:00	83.2	Adult	90	Unknown	No	(C) 220m	Wall	Wet	Dry
2022-11-28	Barbourula	busuangensis		No	Pink	20:47:00	26.3	Juvenile	1	Unknown	No	(C) 220m	Wall	Wet	Dry
2022-12-01	Barbourula	busuangensis	0007DF1C9A	YES		18:42:00	45.9	Subadult	16	Unknown	No	(A) 40m	On rock	Transition	Dry
2022-12-01	Barbourula	busuangensis	0007D2AFFA	No		18:42:00	47.5	Subadult	17	Unknown	No	(A) 40m	On rock	Transition	Dry
2022-12-01	Barbourula	busuangensis	0007D5D0E1	YES		18:48:00	41.8	Subadult	15	Unknown	No	(A) 70m	On rock	Transition	Dry
2022-12-01	Barbourula	busuangensis	0007E4C1A4	YES		18:51:00	47	Subadult	19	Unknown	No	(A) 80m	Small pool	Transition	Dry
2022-12-01	Barbourula	busuangensis	0007D2B074	YES	Blue	18:56:00	40.2	Subadult	8	Unknown	No	(B) 0m	Margin pool	Transition	Dry
2022-12-01	Barbourula	busuangensis	0007D2ABA9	No		19:06:00	72.7	Adult	66	Unknown	No	(B) 70m	Small pool	Transition	Dry
2022-12-01	Barbourula	busuangensis	0007D2AF3B	No		19:12:00	75	Adult	68	Unknown	No	(B) 100m - (C) 0m	Big pool	Transition	Dry
2022-12-01	Barbourula	busuangensis	0007D2E5C7	YES		19:19:00	66.1	Adult	49	Unknown	No	(C) 20m	Wall	Transition	Dry
2022-12-01	Barbourula	busuangensis		YES	Pink	19:30:00	28.8	Juvenile	4	Unknown	No	(C) 80-90m	Margin pool	Transition	Dry
2022-12-01	Barbourula	busuangensis	0007D2CEE6	YES		19:36:00	55.7	Adult	25	Unknown	No	(C)110m	Small pool	Transition	Dry
2022-12-01	Barbourula	busuangensis	0007D5F174	YES		19:36:00	53.2	Adult	22	Unknown	No	(C)120m	Small pool	Transition	Dry
2022-12-01	Barbourula	busuangensis	0007DF1D15	YES		19:46:00	36.3	Subadult	8	Unknown	No	(C) 160m	Entrance of rock	Transition	Dry
2022-12-01	Barbourula	busuangensis	0007D3367E	YES		19:51:00	59.9	Adult	34	Unknown	No	(C) 190m	Entrance of rock	Transition	Dry
2022-12-01	Barbourula	busuangensis		YES	Blue + Pink	19:56:00	33.2	Juvenile	6	Unknown	No	(C) 200-210m	Margin pool	Transition	Dry
2022-12-01	Barbourula	busuangensis	0007D2ADFD	No		20:03:00	77	Adult	79	Unknown	No	(C) 220m	Small pool	Transition	Dry
2022-12-01	Barbourula	busuangensis	0007E0D4BD	YES		20:03:00	84.2	Adult	92	Unknown	No	(C) 220m	Wall	Transition	Dry
2022-12-01	Barbourula	busuangensis	0007D2B013	No		20:10:00	85.2	Adult	87	Unknown	No	(C) 220m	Wall	Transition	Dry
2022-12-01	Barbourula	busuangensis	0007D5CF96	YES		20:10:00	70.1	Adult	56	Unknown	No	(C) 220m	Wall	Transition	Dry
2022-12-03	Barbourula	busuangensis	0007D5CAEC	YES		18:46:00	48.2	Subadult	11	Unknown	No	(A) 100m - (B) 0m	Entrance of rock	Transition	Dry
2022-12-03	Barbourula	busuangensis	0007D2B074	YES	Blue	18:52:00	42.2	Subadult	8	Unknown	No	(B) 30m	Margin pool	Transition	Dry
2022-12-03	Barbourula	busuangensis		No	Pink	19:02:00	25	Juvenile	3	Unknown	No	(B) 100m - (C) 0m	Margin pool	Transition	Dry
2022-12-03	Barbourula	busuangensis		YES	Pink	19:07:00	28.4	Juvenile	3	Unknown	No	(C) 20m	Margin pool	Transition	Dry
2022-12-03	Barbourula	busuangensis	0007D2AD29	No		19:09:00	74.2	Adult	60	Unknown	No	(C) 20m	Rock cave	Transition	Dry
2022-12-03	Barbourula	busuangensis		No	Pink	19:17:00	23.4	Juvenile	1	Unknown	No	(C) 70m	Margin pool	Transition	Dry
2022-12-03	Barbourula	busuangensis		No	Pink	19:23:00	28.5	Juvenile	3	Unknown	No	(C)100m	On rock	Transition	Dry
2022-12-03	Barbourula	busuangensis	0007D2CEE6	YES		19:25:00	55.7	Adult	25	Unknown	No	(C)100m	Margin pool	Transition	Dry
2022-12-03	Barbourula	busuangensis		YES	Pink	19:26:00	25.4	Juvenile	1	Unknown	No	(C)100-110m	Margin pool	Transition	Dry
2022-12-03	Barbourula	busuangensis		No	Pink	19:26:00	25	Juvenile	2	Unknown	No	(C)100-110m	Margin pool	Transition	Dry
2022-12-03	Barbourula	busuangensis		YES	Pink	19:35:00	33.6	Juvenile	5	Unknown	No	(C) 150-160m	On rock	Transition	Dry
2022-12-03	Barbourula	busuangensis	0007D5D1DB	YES		19:41:00	83.2	Adult	76	Unknown	No	(C) 200m	On rock	Transition	Dry
2022-12-03	Barbourula	busuangensis		YES	Blue + Pink	19:44:00	32.6	Juvenile	5	Unknown	No	(C) 200-210m	Margin pool	Transition	Dry
2022-12-03	Barbourula	busuangensis		YES	Green	19:47:00	19.7	Juvenile	1	Unknown	No	(C) 210m	Margin pool	Transition	Dry
2022-12-03	Barbourula	busuangensis	0007DEB547	YES		19:55:00	86.7	Adult	97	Unknown	No	(C) 220m	Big pool	Transition	Dry
2022-12-03	Barbourula	busuangensis	0007D5BA1E	YES		19:55:00	76	Adult	62	Unknown	No	(C) 220m	Wall	Transition	Dry
2022-12-05	Barbourula	busuangensis	0007DECF0F	YES		18:47:00	46.6	Subadult	16	Unknown	No	(A) 50m	Small pool	Transition	Dry
2022-12-05	Barbourula	busuangensis	0007E4C1A4	YES		18:52:00	47.6	Subadult	18	Unknown	No	(A) 80m	Margin pool	Transition	Dry
2022-12-05	Barbourula	busuangensis	0007D5D0E1	YES		18:54:00	45.2	Subadult	16	Unknown	No	(A) 90m	Small pool	Transition	Dry
2022-12-05	Barbourula	busuangensis	0007D2AB8B	No		19:11:00	77.7	Adult	85	Unknown	No	(C)10m	Entrance of rock	Transition	Dry
2022-12-05	Barbourula	busuangensis	0007D5FC98	YES		19:30:00	50.3	Adult	35	Unknown	No	(C) 150m	Margin pool	Transition	Dry
2022-12-05	Barbourula	busuangensis		YES	Pink	19:32:00	32.9	Juvenile	5	Unknown	No	(C) 160m	Margin pool	Transition	Dry
2022-12-05	Barbourula	busuangensis	0007D2AC57	YES		19:35:00	47.3	Subadult	19	Unknown	No	(C) 170-180m	On rock	Transition	Dry
2022-12-05	Barbourula	busuangensis		YES	Pink	19:38:00	33.6	Juvenile	4	Unknown	No	(C) 190-200m	Margin pool	Transition	Dry
2022-12-05	Barbourula	busuangensis		YES	Blue + Pink	19:41:00	34.2	Juvenile	5	Unknown	No	(C) 200-210m	Margin pool	Transition	Dry
2022-12-05	Barbourula	busuangensis		No	Pink	19:43:00	24.4	Juvenile	1	Unknown	No	(C) 210m	Margin pool	Transition	Dry
2022-12-05	Barbourula	busuangensis	0007D2AF9D	No		19:52:00	73.8	Adult	61	Unknown	No	(C) 220m	Big pool	Transition	Dry
2022-12-07	Barbourula	busuangensis	0007DF1C9A	YES		18:44:00	45.3	Subadult	6	Unknown	No	(A) 40m	Margin pool	Transition	Dry
2022-12-07	Barbourula	busuangensis	0007E4C1A4	YES		18:49:00	48.1	Subadult	18	Unknown	No	(A) 80m	Margin pool	Transition	Dry
2022-12-07	Barbourula	busuangensis	0007D5CAEC	YES		18:54:00	48.1	Subadult	10	Unknown	No	(A) 100m - (B) 0m	Margin pool	Transition	Dry
2022-12-07	Barbourula	busuangensis	0007D2E5C7	YES		19:10:00	66.5	Adult	50	Unknown	No	(C)10m	Entrance of rock	Transition	Dry
2022-12-07	Barbourula	busuangensis		YES	Pink	19:18:00	29.8	Juvenile	4	Unknown	No	(C) 80-90m	Margin pool	Transition	Dry
2022-12-07	Barbourula	busuangensis	0007D2CEE6	YES		19:24:00	56.1	Adult	24	Unknown	No	(C)110m	Entrance of rock	Transition	Dry
2022-12-07	Barbourula	busuangensis	0007D5FC98	YES		19:29:00	50.8	Adult	35	Unknown	No	(C) 150m	Rock cave	Transition	Dry
2022-12-07	Barbourula	busuangensis	0007DEAC11	YES		19:31:00	41.2	Subadult	9	Unknown	No	(C) 160m	Small pool	Transition	Dry
2022-12-07	Barbourula	busuangensis	0007D2AC57	YES		19:34:00	48.4	Adult	18	Unknown	No	(C) 170-180m	Rock cave	Transition	Dry
2022-12-07	Barbourula	busuangensis	0007D60A81	YES		19:40:00	47.5	Adult	24	Unknown	No	(C) 200-210m	Entrance of rock	Transition	Dry
2022-12-07	Barbourula	busuangensis		YES	Blue + Pink	19:40:00	33.6	Juvenile	4	Unknown	No	(C) 200-210m	Margin pool	Transition	Dry
2022-12-07	Barbourula	busuangensis	0007D2AFEA	No		19:50:00	60	Adult	29	Unknown	No	(C) 220m	On rock	Transition	Dry
2022-12-07	Barbourula	busuangensis	0007D2ACE4	No		19:50:00	76.9	Adult	55	Unknown	No	(C) 220m	On rock	Transition	Dry
2022-12-07	Barbourula	busuangensis		YES	Pink	19:50:00	24.3	Juvenile	1	Unknown	No	(C) 220m	On rock	Transition	Dry
2023-04-11	Barbourula	busuangensis	LOST	YES		19:12:00	58.6	Adult	23	Unknown	No	(A) 30m	Margin pool	Dry	Dry
2023-04-11	Barbourula	busuangensis	LOST	YES		19:15:00	58.6	Adult	25	Unknown	No	(A) 40m	Margin pool	Dry	Dry
2023-04-11	Barbourula	busuangensis	LOST	YES		19:17:00	56.3	Adult	21	Unknown	No	(A) 50m	Margin pool	Dry	Dry
2023-04-11	Barbourula	busuangensis	LOST	YES		19:30:00	60	Adult	24	Unknown	No	(A) 70-80m	On rock	Dry	Dry
2023-04-11	Barbourula	busuangensis	LOST	YES		19:34:00	61.2	Adult	33	Unknown	No	(A) 80-90m	Under rock	Dry	Dry
2023-04-11	Barbourula	busuangensis	LOST	YES		19:49:00	58.7	Adult	25	Unknown	No	(B) 50m	On rock	Dry	Dry
2023-04-11	Barbourula	busuangensis		YES	Pink + Purple	20:21:00	33.3	Juvenile	9	Unknown	No	(C) 70m	Under rock	Dry	Dry
2023-04-11	Barbourula	busuangensis	LOST	YES		20:36:00	42.3	Subadult	13	Unknown	No	(C) 130m	Under rock	Dry	Dry
2023-04-11	Barbourula	busuangensis	0007DF1C9A	YES		20:57:00	54.9	Adult	19	Unknown	No	(A) 20-30m	Margin pool	Dry	Dry
2023-04-11	Barbourula	busuangensis		YES	Pink + Purple	20:59:00	27	Juvenile	3	Unknown	No	(C) 220m	Margin pool	Dry	Dry
2023-04-11	Barbourula	busuangensis		No	Orange	21:10:00	13.2	Juvenile	0	Unknown	No	(C) 220m	Small pool	Dry	Dry
2023-04-11	Barbourula	busuangensis		No	Orange	21:10:00	13.1	Juvenile	0	Unknown	No	(C) 220m	Small pool	Dry	Dry
2023-04-11	Barbourula	busuangensis	0007D5DF23	No		21:15:00	70.7	Adult	67	Female	Gravid	(C) 220m	Big pool	Dry	Dry
2023-04-13	Barbourula	busuangensis	0007DF1C9A	YES		19:16:00	55.9	Adult	22	Unknown	No	(A) 20-30m	Under rock	Dry	Wet
2023-04-13	Barbourula	busuangensis	0007D32A9B	YES		19:18:00	59.1	Adult	24	Unknown	No	(A) 40m	On rock	Dry	Wet
2023-04-13	Barbourula	busuangensis	0007D2AE51	No		19:20:00	36.2	Juvenile	9	Unknown	No	(A) 40m	Small pool	Dry	Wet
2023-04-13	Barbourula	busuangensis	0007DECF0F	YES		19:27:00	53.2	Adult	24	Unknown	No	(A) 70m	On rock	Dry	Wet
2023-04-13	Barbourula	busuangensis	0007D5CAEC	YES		19:37:00	48.6	Subadult	14	Unknown	No	(A) 100m - (B) 0m	Under rock	Dry	Wet
2023-04-13	Barbourula	busuangensis	0007D48482	YES		19:45:00	60	Adult	30	Unknown	No	(B) 40m	Under rock	Dry	Wet
2023-04-13	Barbourula	busuangensis	0007DEAC69	YES		19:48:00	50.1	Adult	18	Unknown	No	(B) 50m	On rock	Dry	Wet
2023-04-13	Barbourula	busuangensis	0007D45F47	No		19:51:00	84.3	Adult	91	Unknown	No	(A) 60-70m	Big pool	Dry	Wet
2023-04-13	Barbourula	busuangensis	0007D33806	YES		20:07:00	78.5	Adult	64	Unknown	No	(C) 30m	Big pool	Dry	Wet
2023-04-13	Barbourula	busuangensis	0007D2B025	No		20:15:00	54.7	Adult	25	Unknown	No	(C) 80m	Margin pool	Dry	Wet
2023-04-13	Barbourula	busuangensis	0007D2AF67	No		20:19:00	74.3	Adult	55	Unknown	No	(C)100m	Wall	Dry	Wet
2023-04-13	Barbourula	busuangensis		No	Purple	20:25:00	32.6	Juvenile	5	Unknown	No	(C)120m	Small pool	Dry	Wet
2023-04-13	Barbourula	busuangensis	0007D5FAE4	YES		20:27:00	62.5	Adult	33	Unknown	No	(C) 130-140m	Wall	Dry	Wet
2023-04-13	Barbourula	busuangensis	0007D4592D	YES		20:30:00	67.5	Adult	39	Unknown	No	(C)140m	Wall	Dry	Wet
2023-04-13	Barbourula	busuangensis	0007D2AF04	No		20:34:00	75.8	Adult	62	Unknown	No	(C) 160m	Wall	Dry	Wet
2023-04-13	Barbourula	busuangensis	0007D33089	YES		20:41:00	47.2	Subadult	11	Unknown	No	(C) 180m	On rock	Dry	Wet
2023-04-13	Barbourula	busuangensis	0007D3367E	YES		20:45:00	62.2	Adult	34	Unknown	No	(C) 190m	On rock	Dry	Wet
2023-04-13	Barbourula	busuangensis	0007D5D6F9	YES		20:48:00	95	Adult	96	Unknown	No	(C) 200m	Big pool	Dry	Wet
2023-04-13	Barbourula	busuangensis		No	Purple	20:50:00	30.6	Juvenile	4	Unknown	No	(C)200-210m	Margin pool	Dry	Wet
2023-04-13	Barbourula	busuangensis	0007D60A81	YES		2052	60.3	Adult	25	Unknown	No	(C) 200-210m	On rock	Dry	Wet
2023-04-13	Barbourula	busuangensis		No	Orange	20:56:00	11.6	Juvenile	0	Unknown	No	(C)210m	On rock	Dry	Wet
2023-04-13	Barbourula	busuangensis		No	Orange	20:59:00	10.5	Juvenile	0	Unknown	No	(C)220m	Margin pool	Dry	Wet
2023-04-13	Barbourula	busuangensis	0007D2B06C	YES		21:45:00	74.3	Adult	50	Unknown	No	(C) 220m	Wall	Dry	Wet
2023-04-13	Barbourula	busuangensis	0007D2B0B8	No		21:45:00	79.1	Adult	72	Unknown	No	(C)220m	Margin pool	Dry	Wet
2023-04-15	Barbourula	busuangensis	0007D2B02B	No		19:47:00	62.6	Adult	28	Unknown	No	SR: 12º12’12” N 119º55’9” E	Big pool	Dry	Dry
2023-04-15	Barbourula	busuangensis	0007D2AD21	No		19:51:00	57.9	Adult	31	Unknown	No	SR: 12º12’12” N 119º55’9” E	Margin pool	Dry	Dry
2023-04-15	Barbourula	busuangensis		No		19:56:00	33.9	Juvenile	7	Unknown	No	SR: 12º12’13” N 119º55’12” E	Margin pool	Dry	Dry
2023-04-15	Barbourula	busuangensis	0007D2CB88	YES		19:59:00	61.1	Adult	36	Unknown	No	SR: 12º12’13” N 119º55’12” E	Rock cave	Dry	Dry
2023-04-15	Barbourula	busuangensis	0007D5CDDE	YES		19:59:00	76.5	Adult	75	Unknown	No	SR: 12º12’13” N 119º55’12” E	Rock cave	Dry	Dry
2023-04-15	Barbourula	busuangensis	0007D2AFA4	YES		20:05:00	52.5	Adult	25	Unknown	No	SR: 12º12’13” N 119º55’12” E	Margin pool	Dry	Dry
2023-04-15	Barbourula	busuangensis	0007D5D7F0	YES		20:10:00	61.9	Adult	30	Unknown	No	SR: 12º12’14” N 119º55’13” E	Small pool	Dry	Dry
2023-04-15	Barbourula	busuangensis	0007D2AC51	No		20:17:00	56.8	Adult	31	Unknown	No	SR: 12º12’13” N 119º55’14” E	Under rock	Dry	Dry
2023-04-15	Barbourula	busuangensis	0007D2AF7B	No		20:21:00	79.8	Adult	66	Unknown	No	SR: 12º12’13” N 119º55’15” E	Under rock	Dry	Dry
2023-04-15	Barbourula	busuangensis	0007D32B6D	YES		20:23:00	52.7	Adult	22	Unknown	No	SR: 12º12’13” N 119º55’15” E	Margin pool	Dry	Dry
2023-04-15	Barbourula	busuangensis	0007D5E531	YES		20:33:00	87.1	Adult	76	Unknown	No	SR: 12º12’13” N 119º55’15” E	Small pool	Dry	Dry
2023-04-20	Barbourula	busuangensis	0007D2AFA4	YES		19:48:00	58.3	Adult	22	Unknown	No	SR:12º12’13” N 119º55’13” E	Under rock	Dry	Dry
2023-04-20	Barbourula	busuangensis	0007D2AF33	No		20:12:00	56.1	Adult	23	Unknown	No	SR:12º12’13” N 119º55’13” E	Margin pool	Dry	Dry
2023-04-20	Barbourula	busuangensis	0007D2AD3C	YES		20:12:00	54.2	Adult	28	Unknown	No	SR:12º12’13” N 119º55’13” E	Margin pool	Dry	Dry
2023-04-20	Barbourula	busuangensis	0007D2AD24	YES		20:20:00	56	Adult	20	Unknown	No	SR:12º12’14” N 119º55’13” E	Small pool	Dry	Dry
2023-04-20	Barbourula	busuangensis	0007D5D87F	YES		20:33:00	66.9	Adult	42	Unknown	No	SR:12º12’15” N 119º55’14” E	Small pool	Dry	Dry
2023-04-20	Barbourula	busuangensis	0007D5E7F0	YES		20:34:00	69.4	Adult	50	Unknown	No	SR:12º12’16” N 119º55’15” E	Rock cave	Dry	Dry
2023-04-20	Barbourula	busuangensis	0007D3571B	YES		20:35:00	64.5	Adult	32	Unknown	No	SR:12º12’16” N 119º55’15” E	Under rock	Dry	Dry
2023-04-20	Barbourula	busuangensis	0007D5B7CF	YES		20:38:00	83.1	Adult	72	Unknown	No	SR:12º12’16” N 119º55’14” E	Big pool	Dry	Dry
2023-04-20	Barbourula	busuangensis	0007D5B2B6	YES		20:38:00	76.3	Adult	53	Unknown	No	SR:12º12’16” N 119º55’14” E	Margin pool	Dry	Dry
2023-04-20	Barbourula	busuangensis	0007D2B01E	No		20:54:00	64.9	Adult	35	Unknown	No	SR:12º12’18” N 119º55’15” E	Margin pool	Dry	Dry
2023-04-20	Barbourula	busuangensis	0007D2AD0A	YES		20:56:00	68	Adult	43	Unknown	No	SR:12º12’18” N 119º55’15” E	Rock cave	Dry	Dry
2023-04-20	Barbourula	busuangensis	0007D2AF6A	No		21:03:00	48.2	Subadult	19	Unknown	No	SR:12º12’19” N 119º55’17” E	Small pool	Dry	Dry
2023-04-20	Barbourula	busuangensis	0007D5FE71	YES		21:11:00	85.6	Adult	70	Unknown	No	SR: 12º12’19” N 119º55’16” E	Big pool	Dry	Dry
2023-04-20	Barbourula	busuangensis	0007D2AF4A	No		21:11:00	83.5	Adult	67	Unknown	No	SR: 12º12’19” N 119º55’16” E	Big pool	Dry	Dry
2023-04-22	Barbourula	busuangensis	0007DF1C9A	YES		19:29:00	55.9	Adult	23	Unknown	No	(A) 40m	Margin pool	Dry	Dry
2023-04-22	Barbourula	busuangensis	0007D32A9B	YES		19:30:00	61.1	Adult	30	Unknown	No	(A) 40m	Rock cave	Dry	Dry
2023-04-22	Barbourula	busuangensis	0007E4C1A4	YES		19:36:00	56.2	Adult	24	Unknown	No	(A) 80m	Margin pool	Dry	Dry
2023-04-22	Barbourula	busuangensis	0007D48482	YES		19:51:00	62.4	Adult	32	Unknown	No	(B) 40m	Small pool	Dry	Dry
2023-04-22	Barbourula	busuangensis	0007D2AF5E	No		19:54:00	36.4	Subadult	7	Unknown	No	(B) 50-60m	Margin pool	Dry	Dry
2023-04-22	Barbourula	busuangensis	0007D2ABDA	YES	Pink	20:24:00	39.1	Subadult	6	Unknown	No	(C) 150-160m	Margin pool	Dry	Dry
2023-04-22	Barbourula	busuangensis	0007D2AF0F	YES	Pink	20:31:00	38.2	Subadult	9	Unknown	No	(C) 190-200m	Margin pool	Dry	Dry
2023-04-22	Barbourula	busuangensis	0007D2AC50	No		20:35:00	38.4	Subadult	6	Unknown	No	(C) 210m	Margin pool	Dry	Dry
2023-04-22	Barbourula	busuangensis	0007D4961E	No		20:55:00	63.5	Adult	43	Unknown	No	(C) 220m	Big pool	Dry	Dry
2023-04-22	Barbourula	busuangensis	0007D2AC29	No		20:55:00	68.9	Adult	43	Unknown	No	(C) 220m	Big pool	Dry	Dry
2023-04-22	Barbourula	busuangensis	0007D2AF27	No		20:55:00	55.6	Adult	26	Unknown	No	(C) 220m	Big pool	Dry	Dry
2023-04-22	Barbourula	busuangensis	0007D2B0C9	No		20:55:00	80.4	Adult	75	Unknown	No	(C) 220m	Big pool	Dry	Dry
2023-04-22	Barbourula	busuangensis	0007D4645B	No		20:55:00	69.7	Adult	51	Unknown	No	(C) 220m	Big pool	Dry	Dry
2023-04-22	Barbourula	busuangensis		No	Orange	21:10:00	13.2	Juvenile	0	Unknown	No	(C) 220m	On rock	Dry	Dry
2023-04-22	Barbourula	busuangensis		No	Orange	21:10:00	13.2	Juvenile	0	Unknown	No	(C) 220m	Margin pool	Dry	Dry
2023-04-22	Barbourula	busuangensis		No	Orange	21:10:00	13.1	Juvenile	0	Unknown	No	(C) 220m	Margin pool	Dry	Dry
2023-04-22	Barbourula	busuangensis	0007D2B0C6	No		21:40:00	68.1	Adult	51	Unknown	No	(C) 220m	Wall	Dry	Dry
2023-05-04	Barbourula	busuangensis	0007E4C1A4	YES		19:40:00	58.1	Adult	24	Unknown	No	(A) 80m	On rock	Transition	Wet
2023-05-04	Barbourula	busuangensis		YES	Pink + Purple	19:53:00	33.3	Juvenile	5	Unknown	No	(B) 80m	Margin pool	Transition	Wet
2023-05-04	Barbourula	busuangensis	0007D5CEB6	YES		20:00:00	65.1	Adult	42	Unknown	No	(C) 10m	Rock cave	Transition	Wet
2023-05-04	Barbourula	busuangensis		No	Purple	20:14:00	28.7	Juvenile	4	Unknown	No	(C) 80m	On rock	Transition	Wet
2023-05-04	Barbourula	busuangensis	0007E0F080	YES		20:26:00	46.6	Subadult	15	Unknown	No	(C) 140m	On rock	Transition	Wet
2023-05-04	Barbourula	busuangensis	0007DECC30	YES		20:27:00	69.2	Adult	46	Unknown	No	(C) 140m	Wall	Transition	Wet
2023-05-04	Barbourula	busuangensis		No	Purple	20:44:00	31.6	Juvenile	4	Unknown	No	(C) 190-200m	Margin pool	Transition	Wet
2023-05-04	Barbourula	busuangensis	0007D2AD78	No		20:45:00	49.5	Subadult	14	Unknown	No	(C) 190-200m	Rock cave	Transition	Wet
2023-05-04	Barbourula	busuangensis	0007D44FF7	No		20:47:00	87	Adult	85	Unknown	No	(C) 200m	Big pool	Transition	Wet
2023-05-04	Barbourula	busuangensis		No	Purple	20:51:00	34.3	Juvenile	4	Unknown	No	(C) 210-220m	Margin pool	Transition	Wet
2023-05-04	Barbourula	busuangensis	0007D2ABC1	YES	Pink	20:52:00	41.5	Subadult	10	Unknown	No	(C) 210-220m	Margin pool	Transition	Wet
2023-05-04	Barbourula	busuangensis		No	Orange	21:01:00	13.4	Juvenile	0	Unknown	No	(C)220m	Margin pool	Transition	Wet
2023-05-04	Barbourula	busuangensis		No	Orange	21:01:00	12	Juvenile	0	Unknown	No	(C)220m	Margin pool	Transition	Wet
2023-05-04	Barbourula	busuangensis	0007D2B0C9	YES		21:15:00	80.2	Adult	72	Unknown	No	(C) 220m	Big pool	Transition	Wet
2023-05-04	Barbourula	busuangensis	0007D4961E	YES		21:15:00	63.2	Adult	41	Unknown	No	(C) 220m	Big pool	Transition	Wet
2023-05-04	Barbourula	busuangensis	0007D2AB6B	No		21:15:00	79.9	Adult	60	Unknown	No	(C)220m	Big pool	Transition	Wet
2023-05-04	Barbourula	busuangensis	0007D5CF96	YES		21:15:00	73.4	Adult	55	Unknown	No	(C) 220m	Big pool	Transition	Wet
2023-05-04	Barbourula	busuangensis	0007D5DF23	YES		21:15:00	71.5	Adult	51	Unknown	No	(C)220m	Big pool	Transition	Wet
2023-05-04	Barbourula	busuangensis	0007D5DB13	YES		21:15:00	74.2	Adult	55	Unknown	No	(C) 220m	Big pool	Transition	Wet
2023-05-04	Barbourula	busuangensis		No	Orange	21:15:00	11.8	Juvenile	0	Unknown	No	(C)220m	Big pool	Transition	Wet
2023-05-06	Barbourula	busuangensis	0007DF1C9A	YES		19:39:00	55.3	Adult	22	Unknown	No	(A) 40m	Small pool	Transition	Wet
2023-05-06	Barbourula	busuangensis	0007D2B074	YES	Blue	19:51:00	44.5	Subadult	13	Unknown	No	(B) 0m	Margin pool	Transition	Wet
2023-05-06	Barbourula	busuangensis	0007D2AFC8	No		20:20:00	37.8	Subadult	8	Unknown	No	(C) 80m	Margin pool	Transition	Wet
2023-05-06	Barbourula	busuangensis		YES	Pink + Purple	20:21:00	28.6	Juvenile	4	Unknown	No	(C) 80m	On rock	Transition	Wet
2023-05-06	Barbourula	busuangensis	0007DECC30	YES		20:31:00	69.9	Adult	45	Unknown	No	(C) 140m	Wall	Transition	Wet
2023-05-06	Barbourula	busuangensis	0007D2C636	YES		20:37:00	90.9	Adult	100	Unknown	No	(C) 170m	Rock cave	Transition	Wet
2023-05-06	Barbourula	busuangensis	0007D2AC57	YES		20:39:00	53.4	Adult	22	Unknown	No	(C) 180m	On rock	Transition	Wet
2023-05-06	Barbourula	busuangensis	0007D5ED75	YES		20:40:00	66.3	Adult	39	Unknown	No	(C) 190m	Rock cave	Transition	Wet
2023-05-06	Barbourula	busuangensis	0007D2AC2B	No		20:43:00	76.3	Adult	75	Unknown	No	(C) 220m	Rock cave	Transition	Wet
2023-05-06	Barbourula	busuangensis		No	purple	20:45:00	21.6	Juvenile	2	Unknown	No	(C) 210-220m	Under rock	Transition	Wet
2023-05-06	Barbourula	busuangensis		No	orange	20:47:00	11.7	Juvenile	0	Unknown	No	(C) 220m	Margin pool	Transition	Wet
2023-05-06	Barbourula	busuangensis		YES	purple	20:47:00	13.3	Juvenile	0	Unknown	No	(C) 220m	Margin pool	Transition	Wet
2023-05-06	Barbourula	busuangensis	0007D5DF23	YES		21:00:00	71	Adult	49	Unknown	No	(C) 220m	Margin pool	Transition	Wet
2023-05-06	Barbourula	busuangensis	0007D2B06C	YES		21:00:00	74.6	Adult	47	Unknown	No	(C) 220m	Big pool	Transition	Wet
2023-05-06	Barbourula	busuangensis	0007D2ACE1	No		21:00:00	82.4	Adult	82	Unknown	No	(C) 220m	Big pool	Transition	Wet
2023-05-06	Barbourula	busuangensis	0007D4961E	YES		21:00:00	63.1	Adult	41	Unknown	No	(C) 220m	Big pool	Transition	Wet
2023-05-06	Barbourula	busuangensis	0007D2AD11	No		21:00:00	54	Adult	22	Unknown	No	(C) 220m	Big pool	Transition	Wet
2023-05-11	Barbourula	busuangensis	0007D32A9B	YES		20:00:00	60.7	Adult	30	Unknown	No	(A) 40m		Transition	Wet
2023-05-11	Barbourula	busuangensis	0007D42D35	No		20:00:00	68	Adult	54	Unknown	No	(A) 50m		Transition	Wet
2023-05-11	Barbourula	busuangensis	0007E4C1A4	YES		20:00:00	58.4	Adult	25	Unknown	No	(A) 90m		Transition	Wet
2023-05-11	Barbourula	busuangensis		YES	Purple	20:00:00	30.7	Juvenile	5	Unknown	No	(C) 110m		Transition	Wet
2023-05-11	Barbourula	busuangensis	0007DECC30	YES		20:00:00	71.3	Adult	48	Unknown	No	(C) 140m		Transition	Wet
2023-05-11	Barbourula	busuangensis		YES	Pink	20:00:00	29.1	Juvenile	4	Unknown	No	(C) 120m		Transition	Wet
2023-05-11	Barbourula	busuangensis	0007D2AD78	YES		20:00:00	49.2	Subadult	14	Unknown	No	(C) 180m		Transition	Wet
2023-05-11	Barbourula	busuangensis		YES	Pink + Purple	20:00:00	29.5	Juvenile	5	Unknown	No	(C) 210m		Transition	Wet
2023-05-11	Barbourula	busuangensis		YES	Pink + Purple	20:00:00	30.4	Juvenile	5	Unknown	No	(C) 210m		Transition	Wet
2023-05-11	Barbourula	busuangensis		No		20:00:00	12.6	Juvenile	0	Unknown	No	(C) 220m		Transition	Wet
2023-05-11	Barbourula	busuangensis		YES	Orange	20:00:00	13.4	Juvenile	0	Unknown	No	(C) 220m		Transition	Wet
2023-05-11	Barbourula	busuangensis		No		20:00:00	34	Juvenile	6	Unknown	No	(C) 220m		Transition	Wet
2023-05-11	Barbourula	busuangensis	0007D5DF23	YES		20:00:00	72.2	Adult	48	Unknown	No	(C) 220m		Transition	Wet
2023-05-11	Barbourula	busuangensis	0007D2AE09	No		20:00:00	65.1	Adult	41	Unknown	No	(C) 220m		Transition	Wet
2023-05-11	Barbourula	busuangensis	0007D2AF27	YES		20:00:00	55.6	Adult	25	Unknown	No	(C) 220m		Transition	Wet
2023-05-11	Barbourula	busuangensis	0007D4B91A	No		20:00:00	62.3	Adult	36	Unknown	No	(C) 220m		Transition	Wet
2023-05-11	Barbourula	busuangensis	0007D2AD7C	No		20:00:00	54.1	Adult	19	Unknown	No	(C) 220m		Transition	Wet
2023-05-17	Barbourula	busuangensis	0007D2AE68	No		20:30:00	63.4	Adult	38	Unknown	No	(A) 0m		Transition	Dry
2023-05-17	Barbourula	busuangensis	0007D5CFC1	YES		20:30:00	77.1	Adult	69	Unknown	No	(A) 20m		Transition	Dry
2023-05-17	Barbourula	busuangensis		YES	Purple	20:30:00	33.7	Juvenile	6	Unknown	No	(A) 20m		Transition	Dry
2023-05-17	Barbourula	busuangensis	0007DECF0F	YES		20:30:00	53.1	Adult	22	Unknown	No	(A) 50m		Transition	Dry
2023-05-17	Barbourula	busuangensis	0007E4C1A4	YES		20:30:00	58.6	Adult	24	Unknown	No	(A) 90m		Transition	Dry
2023-05-17	Barbourula	busuangensis	0007D48482	YES		20:30:00	62.4	Adult	31	Unknown	No	(B) 40m		Transition	Dry
2023-05-17	Barbourula	busuangensis	0007D2AF5E	YES		20:30:00	38.1	Subadult	8	Unknown	No	(C) 50m		Transition	Dry
2023-05-17	Barbourula	busuangensis	0007D2AD78	YES		20:30:00	49.4	Subadult	14	Unknown	No	(C) 80m		Transition	Dry
2023-05-17	Barbourula	busuangensis		YES	Purple	20:30:00	33.5	Juvenile	6	Unknown	No	(C) 120m		Transition	Dry
2023-05-17	Barbourula	busuangensis		YES	Pink + Purple	20:30:00	31.3	Juvenile	4	Unknown	No	(C) 210m		Transition	Dry
2023-05-17	Barbourula	busuangensis	0007D2AFC8	YES		20:30:00	37.1	Subadult	9	Unknown	No	(C) 220m		Transition	Dry
2023-05-17	Barbourula	busuangensis	0007D2AC2B	YES		20:30:00	77.6	Adult	79	Unknown	No	(C) 220m		Transition	Dry
2023-05-17	Barbourula	busuangensis	0007D4B91A	YES		20:30:00	62.9	Adult	33	Unknown	No	(C) 220m		Transition	Dry
2023-05-17	Barbourula	busuangensis	0007D2AC29	YES		20:30:00	68.2	Adult	43	Unknown	No	(C) 220m		Transition	Dry
2023-05-17	Barbourula	busuangensis	0007D45A2A	No		20:30:00	91.6	Adult	100	Unknown	No	(C) 220m		Transition	Dry
2023-05-17	Barbourula	busuangensis	0007D2AEB5	No		20:30:00	74.9	Adult	60	Unknown	No	(C) 220m		Transition	Dry
2023-05-17	Barbourula	busuangensis	0007D2AF9D	YES		20:30:00	74.3	Adult	56	Unknown	No	(C) 220m		Transition	Dry
2023-05-26	Barbourula	busuangensis	0007DECF0F	YES		18:59:00	55.6	Adult	23	Unknown	No	(A) 50m	Margin pool	Transition	Dry
2023-05-26	Barbourula	busuangensis		No		19:19:00	12.6	Juvenile	0	Unknown	No	(B) 100m	On rock	Transition	Dry
2023-05-26	Barbourula	busuangensis	0007D2AF44	No		19:33:00	47.2	Subadult	16	Unknown	No	(C) 70-80m	Small pool	Transition	Dry
2023-05-26	Barbourula	busuangensis		No		19:39:00	11.8	Juvenile	0	Unknown	No	(C) 80m	On rock	Transition	Dry
2023-05-26	Barbourula	busuangensis	0007D3DDD5	YES		19:41:00	57.3	Adult	26	Unknown	No	(C) 100m	Big pool	Transition	Dry
2023-05-26	Barbourula	busuangensis		No		19:45:00	12.4	Juvenile	0	Unknown	No	(C) 100m	On rock	Transition	Dry
2023-05-26	Barbourula	busuangensis		YES	Pink + Purple	19:46:00	31.9	Juvenile	4	Unknown	No	(C) 100-110m	Margin pool	Transition	Dry
2023-05-26	Barbourula	busuangensis	0007D2CA3B	YES		19:56:00	55.9	Adult	20	Unknown	No	(C) 150m	Margin pool	Transition	Dry
2023-05-26	Barbourula	busuangensis	0007D2AF0F	YES		20:03:00	41.2	Subadult	10	Unknown	No	(C) 190-200m	Margin pool	Transition	Dry
2023-05-26	Barbourula	busuangensis	0007D2AC50	YES		20:07:00	38.9	Subadult	6	Unknown	No	(C) 200-210m	Margin pool	Transition	Dry
2023-05-26	Barbourula	busuangensis		No		20:10:00	30.8	Juvenile	6	Unknown	No	(C)220m	Margin pool	Transition	Dry
2023-05-26	Barbourula	busuangensis		No		20:18:00	15.2	Juvenile	0	Unknown	No	(C)220m	Big pool	Transition	Dry
2023-06-09	Barbourula	busuangensis		YES	Purple	19:25:00	34.7	Juvenile	7	Unknown	No	(A) 0-10m	Margin pool	Wet	Wet
2023-06-09	Barbourula	busuangensis	0007E9E3CF	YES		19:28:00	79.1	Adult	76	Unknown	No	(A) 40m	Small pool	Wet	Wet
2023-06-09	Barbourula	busuangensis	0007D3E139	No		19:38:00	77.2	Adult	79	Unknown	No	(B) 20-30m	Wall	Wet	Wet
2023-06-09	Barbourula	busuangensis	0007E4C1A4	YES		19:48:00	58.5	Adult	26	Unknown	No	(C) 0m	On rock	Wet	Wet
2023-06-09	Barbourula	busuangensis	0007D5F116	YES		19:59:00	77.2	Adult	75	Unknown	No	(C) 70m	Wall	Wet	Wet
2023-06-09	Barbourula	busuangensis	0007D3A688	No		19:59:00	74.4	Adult	56	Unknown	No	(C) 70m	Wall	Wet	Wet
2023-06-09	Barbourula	busuangensis	0007D38EB8	No		20:04:00	74.2	Adult	55	Unknown	No	(C) 90m	Margin pool	Wet	Wet
2023-06-09	Barbourula	busuangensis	0007D5FA8F	YES		20:04:00	89.6	Adult	100	Unknown	No	(C) 100m	Under rock	Wet	Wet
2023-06-09	Barbourula	busuangensis	0007D5DAEB	No		20:13:00	70.1	Adult	52	Unknown	No	(C) 140m	Wall	Wet	Wet
2023-06-09	Barbourula	busuangensis	0007DEBF09	YES		20:13:00	74.7	Adult	50	Unknown	No	(C) 140m	Wall	Wet	Wet
2023-06-09	Barbourula	busuangensis	0007D2DC67	YES		20:13:00	77.2	Adult	45	Unknown	No	(C) 140m	Wall	Wet	Wet
2023-06-09	Barbourula	busuangensis	0007D5FC98	YES		20:17:00	60.7	Adult	35	Unknown	No	(C) 150m	Small pool	Wet	Wet
2023-06-09	Barbourula	busuangensis	0007D2ABDA	YES		20:18:00	39.4	Subadult	8	Unknown	No	(C) 150m	Margin pool	Wet	Wet
2023-06-09	Barbourula	busuangensis	0007D5E042	YES		20:20:00	78	Adult	75	Unknown	No	(C) 160m	Wall	Wet	Wet
2023-06-09	Barbourula	busuangensis	0007D5EEC1	No		20:22:00	63.9	Adult	39	Unknown	No	(C) 160-170m	On rock	Wet	Wet
2023-06-09	Barbourula	busuangensis	0007D2AC57	YES		20:25:00	54.9	Adult	20	Unknown	No	(C) 180m	Wall	Wet	Wet
2023-06-09	Barbourula	busuangensis	0007D5D9A3	YES		20:40:00	71.1	Adult	45	Unknown	No	(C) 220m	Wall	Wet	Wet
2023-06-09	Barbourula	busuangensis		YES	Orange	20:44:00	14.2	Juvenile	0	Unknown	No	(C) 220m	Margin pool	Wet	Wet
2023-06-09	Barbourula	busuangensis	0007D60B2C	No		20:44:00	68.4	Adult	47	Unknown	No	(C) 220m	Big pool	Wet	Wet
2023-06-13	Barbourula	busuangensis	0007DECF0F	YES		19:20:00	55.5	Adult	27	Unknown	No	(A) 50m	Margin pool	Wet	Dry
2023-06-13	Barbourula	busuangensis		No	Purple	19:22:00	32.2	Juvenile	5	Unknown	No	(A) 50m	Margin pool	Wet	Dry
2023-06-13	Barbourula	busuangensis	0007D2AFC8	YES		19:26:00	37.6	Subadult	10	Unknown	No	(A) 80m	Small pool	Wet	Dry
2023-06-13	Barbourula	busuangensis		No	Orange	19:40:00	13.2	Juvenile	0	Unknown	No	(B) 80m	Margin pool	Wet	Dry
2023-06-13	Barbourula	busuangensis	0007D2BE63	No		19:48:00	43.8	Subadult	10	Unknown	No	(C) 20m	Under rock	Wet	Dry
2023-06-13	Barbourula	busuangensis		No	Purple	19:53:00	32.6	Juvenile	5	Unknown	No	(C) 40-50m	Margin pool	Wet	Dry
2023-06-13	Barbourula	busuangensis	0007E0EE5F	YES		20:09:00	57	Adult	22	Unknown	No	(C) 120m	Margin pool	Wet	Dry
2023-06-13	Barbourula	busuangensis	0007E4C1A4	YES		20:13:00	58.9	Adult	26	Unknown	No	(C) 140m	On rock	Wet	Dry
2023-06-13	Barbourula	busuangensis		No	Orange	20:13:00	13.4	Juvenile	0	Unknown	No	(C) 140m	On rock	Wet	Dry
2023-06-13	Barbourula	busuangensis	0007D619B5	YES		20:21:00	52.2	Adult	17	Unknown	No	(C) 190-200m	On rock	Wet	Dry
2023-06-13	Barbourula	busuangensis		No	Orange	20:26:00	13.3	Juvenile	0	Unknown	No	(C) 220m	Margin pool	Wet	Dry
2023-06-13	Barbourula	busuangensis	0007D2E94B	YES		20:28:00	87.8	Adult	98	Unknown	No	(C) 220m	Small pool	Wet	Dry
2023-06-13	Barbourula	busuangensis		No	Orange	20:32:00	13.1	Juvenile	0	Unknown	No	(C) 220m	On rock	Wet	Dry
2023-06-13	Barbourula	busuangensis	0007D5DF23	YES		20:42:00	75.1	Adult	49	Unknown	No	(C) 220m	Big pool	Wet	Dry
2023-06-13	Barbourula	busuangensis	0007D2B93D	No		20:42:00	66	Adult	48	Unknown	No	(C) 220m	Big pool	Wet	Dry
2023-06-13	Barbourula	busuangensis	0007D2ACE1	YES		20:42:00	82.1	Adult	84	Unknown	No	(C) 220m	Big pool	Wet	Dry
2023-06-13	Barbourula	busuangensis	0007D339F2	No		20:42:00	88.4	Adult	82	Unknown	No	(C) 220m	Big pool	Wet	Dry
2023-06-16	Barbourula	busuangensis	0007D5DB13	YES		19:33:00	74.2	Adult	54	Unknown	No	(A) 20m	Under rock	Wet	Dry
2023-06-16	Barbourula	busuangensis	0007D3A688	YES		20:02:00	75.2	Adult	61	Unknown	No	(C) 60m	Under rock	Wet	Dry
2023-06-16	Barbourula	busuangensis	0007D5FA8F	YES		20:05:00	89.8	Adult	98	Unknown	No	(C) 80m	On rock	Wet	Dry
2023-06-16	Barbourula	busuangensis		No	Orange	20:28:00	12.7	Juvenile	0	Unknown	No	(C)220m	Margin pool	Wet	Dry
2023-06-16	Barbourula	busuangensis		YES	Orange	20:37:00	13.6	Juvenile	0	Unknown	No	(C)220m	Margin pool	Wet	Dry
2023-06-16	Barbourula	busuangensis	0007D2AC29	YES		20:39:00	68.1	Adult	45	Unknown	No	(C)220m	Big pool	Wet	Dry
2023-06-19	Barbourula	busuangensis		No		19:10:00	15.1	Juvenile	0	Unknown	No	(A) 30m	On rock	Wet	Dry
2023-06-19	Barbourula	busuangensis		No		19:15:00	34.5	Juvenile	5	Unknown	No	(A) 50m	Margin pool	Wet	Dry
2023-06-19	Barbourula	busuangensis	0007D2AFC8	YES		19:21:00	37.5	Subadult	9	Unknown	No	(A) 80m	Under rock	Wet	Dry
2023-06-19	Barbourula	busuangensis		No		19:32:00	25.3	Juvenile	3	Unknown	No	(B) 60m	Margin pool	Wet	Dry
2023-06-19	Barbourula	busuangensis		No		19:36:00	14.2	Juvenile	0	Unknown	No	(B) 80m	Margin pool	Wet	Dry
2023-06-19	Barbourula	busuangensis		No		19.40	17.1	Juvenile	0	Unknown	No	(C) 0m	On rock	Wet	Dry
2023-06-19	Barbourula	busuangensis		No		19:42:00	15.2	Juvenile	0	Unknown	No	(C) 0m	Margin pool	Wet	Dry
2023-06-19	Barbourula	busuangensis		YES	Pink + Purple	19:46:00	34.7	Juvenile	6	Unknown	No	(C) 30m	Margin pool	Wet	Dry
2023-06-19	Barbourula	busuangensis	0007D5FA8F	YES		19:56:00	89.5	Adult	100	Unknown	No	(C) 80m	Under rock	Wet	Dry
2023-06-19	Barbourula	busuangensis		YES	Pink + Purple	20:02:00	32.5	Juvenile	5	Unknown	No	(C) 100-110m	Small pool	Wet	Dry
2023-06-19	Barbourula	busuangensis	0007DF17A9	YES		20:05:00	47.2	Subadult	15	Unknown	No	(C) 120m	Margin pool	Wet	Dry
2023-06-19	Barbourula	busuangensis		No		20:09:00	13.7	Juvenile	0	Unknown	No	(C) 130-140m	Margin pool	Wet	Dry
2023-06-19	Barbourula	busuangensis	0007DECC30	YES		20:10:00	70.8	Adult	42	Unknown	No	(C) 140m	Rock cave	Wet	Dry
2023-06-19	Barbourula	busuangensis	0007E4C1A4	YES		20:12:00	58.8	Adult	37	Unknown	No	(C) 150m	On rock	Wet	Dry
2023-06-19	Barbourula	busuangensis		No		20:20:00	17.2	Juvenile	0	Unknown	No	(C) 220m	Margin pool	Wet	Dry
2023-06-19	Barbourula	busuangensis		No		20:20:00	13.9	Juvenile	0	Unknown	No	(C) 220m	Margin pool	Wet	Dry
2023-06-19	Barbourula	busuangensis		No		20:20:00	13.9	Juvenile	0	Unknown	No	(C) 220m	Margin pool	Wet	Dry
2023-06-19	Barbourula	busuangensis		No		20:36:00	13.6	Juvenile	0	Unknown	No	(C) 220m	Margin pool	Wet	Dry
2023-06-19	Barbourula	busuangensis		No		20:37:00	15.2	Juvenile	0	Unknown	No	(C) 220m	Big pool	Wet	Dry
2023-06-19	Barbourula	busuangensis	0007D2AD7C	YES		20:37:00	54	Adult	20	Unknown	No	(C) 220m	Big pool	Wet	Dry
2023-06-21	Barbourula	busuangensis		No		18:54:00	13.7	Juvenile	0	Unknown	No	(A) 0m	Margin pool	Wet	Wet
2023-06-21	Barbourula	busuangensis		No		19:00:00	31.8	Juvenile	5	Unknown	No	(A) 50m	On rock	Wet	Wet
2023-06-21	Barbourula	busuangensis	0007DECF0F	YES		19:02:00	55	Adult	25	Unknown	No	(A) 50m	Margin pool	Wet	Wet
2023-06-21	Barbourula	busuangensis	0007D2B074	YES	Blue	19:08:00	44.2	Subadult	13	Unknown	No	(B) 0m	On rock	Wet	Wet
2023-06-21	Barbourula	busuangensis	0007D2DA72	YES		19:17:00	85.8	Adult	87	Unknown	No	(B) 80-90m	Small pool	Wet	Wet
2023-06-21	Barbourula	busuangensis	0007D2BE63	YES		19:23:00	43.1	Subadult	10	Unknown	No	(C) 20m	Small pool	Wet	Wet
2023-06-21	Barbourula	busuangensis		No		19:25:00	34.1	Juvenile	6	Unknown	No	(C) 30m	Margin pool	Wet	Wet
2023-06-21	Barbourula	busuangensis	0007D3972C	YES		19:29:00	73.9	Adult	58	Unknown	No	(C) 40-50m	Margin pool	Wet	Wet
2023-06-21	Barbourula	busuangensis	0007DF1BC8	YES		19:33:00	73.2	Adult	46	Unknown	No	(C) 80m	Rock cave	Wet	Wet
2023-06-21	Barbourula	busuangensis	0007D5FA8F	YES		19:38:00	90.4	Adult	100	Unknown	No	(C) 100m	Under rock	Wet	Wet
2023-06-21	Barbourula	busuangensis	0007D33314	YES		19:38:00	66.7	Adult	35	Unknown	No	(C) 100m	Under rock	Wet	Wet
2023-06-21	Barbourula	busuangensis	0007D5DAEB	YES		19:46:00	73.5	Adult	54	Unknown	No	(C) 140m	Wall	Wet	Wet
2023-06-21	Barbourula	busuangensis	0007D2DC67	YES		19:46:00	78.8	Adult	50	Unknown	No	(C) 140m	Wall	Wet	Wet
2023-06-21	Barbourula	busuangensis	0007D2CA3B	YES		19:48:00	56.2	Adult	22	Unknown	No	(C) 150m	Wall	Wet	Wet
2023-06-21	Barbourula	busuangensis	0007D5EE03	No		19:50:00	68.2	Adult	36	Unknown	No	(C) 160m	Under rock	Wet	Wet
2023-06-21	Barbourula	busuangensis	0007D5BB8E	YES		19:50:00	83.2	Adult	56	Unknown	No	(C) 160m	Under rock	Wet	Wet
2023-06-21	Barbourula	busuangensis	0007D5F114	YES		19:53:00	73.3	Adult	58	Unknown	No	(C) 170m	Under rock	Wet	Wet
2023-06-21	Barbourula	busuangensis	0007D3045A	YES		19:56:00	86.1	Adult	60	Unknown	No	(C) 190m	Big pool	Wet	Wet
2023-06-21	Barbourula	busuangensis	0007E4C1A4	YES		20:00:00	61.2	Adult	26	Unknown	No	(C) 220m	Margin pool	Wet	Wet
2023-06-21	Barbourula	busuangensis	0007D5E72B	No		20:02:00	82.9	Adult	74	Unknown	No	(C) 220m	Big pool	Wet	Wet
2023-06-21	Barbourula	busuangensis	0007D2AC29	YES		20:14:00	70.2	Adult	37	Unknown	No	(C) 220m	Big pool	Wet	Wet
2023-06-21	Barbourula	busuangensis	0007D4961E	YES		20:14:00	63	Adult	42	Unknown	No	(C) 220m	Big pool	Wet	Wet
2023-06-21	Barbourula	busuangensis	0007D2B9C1	YES		20:14:00	83.1	Adult	68	Unknown	No	(C) 220m	Big pool	Wet	Wet
2023-06-21	Barbourula	busuangensis	0007D615B4	YES		20:14:00	70.7	Adult	39	Unknown	No	(C) 220m	Big pool	Wet	Wet
2023-06-21	Barbourula	busuangensis	0007D2B0C6	YES		20:14:00	70.6	Adult	45	Unknown	No	(C) 220m	Big pool	Wet	Wet
2023-06-21	Barbourula	busuangensis	0007D60B2C	YES		20:14:00	70.8	Adult	49	Unknown	No	(C) 220m	Big pool	Wet	Wet
				No						Unknown	No
				No						Unknown	No
				No						Unknown	No
				No						Unknown	No
				No						Unknown	No
				No						Unknown	No
				No						Unknown	No
				No						Unknown	No
				No						Unknown	No
				No						Unknown	No
				No						Unknown	No
				No						Unknown	No
				No						Unknown	No
				No						Unknown	No
				No						Unknown	No
				No						Unknown	No
				No						Unknown	No
				No						Unknown	No
				No						Unknown	No
				No						Unknown	No
				No						Unknown	No
				No						Unknown	No
				No						Unknown	No
				No						Unknown	No
				No						Unknown	No
				No						Unknown	No
				No						Unknown	No
				No						Unknown	No
				No						Unknown	No
				No						Unknown	No
				No						Unknown	No
				No						Unknown	No
				No						Unknown	No
				No						Unknown	No
				No						Unknown	No
				No						Unknown	No
				No						Unknown	No
				No						Unknown	No
				No						Unknown	No
				No						Unknown	No
				No						Unknown	No
				No						Unknown	No
				No						Unknown	No
				No						Unknown	No
				No						Unknown	No
				No						Unknown	No
				No						Unknown	No
				No						Unknown	No
				No						Unknown	No
				No						Unknown	No
				No						Unknown	No
				No						Unknown	No
				No						Unknown	No
				No						Unknown	No
				No						Unknown	No
				No						Unknown	No
				No						Unknown	No
				No						Unknown	No
				No						Unknown	No
				No						Unknown	No
				No						Unknown	No
				No						Unknown	No
				No						Unknown	No
				No						Unknown	No
				No						Unknown	No
				No						Unknown	No
				No						Unknown	No
				No						Unknown	No
				No						Unknown	No
				No						Unknown	No
				No						Unknown	No
				No						Unknown	No
				No						Unknown	No
				No						Unknown	No
				No						Unknown	No
				No						Unknown	No
				No						Unknown	No
				No						Unknown	No
				No						Unknown	No
				No						Unknown	No
				No						Unknown	No
				No						Unknown	No
				No						Unknown	No
				No						Unknown	No
				No						Unknown	No
				No						Unknown	No
				No						Unknown	No
				No						Unknown	No
				No						Unknown	No
				No						Unknown	No
				No						Unknown	No
				No						Unknown	No
				No						Unknown	No
				No						Unknown	No
				No						Unknown	No
				No						Unknown	No
				No						Unknown	No
				No						Unknown	No
				No						Unknown	No
				No						Unknown	No
				No						Unknown	No
				No						Unknown	No
				No						Unknown	No
				No						Unknown	No
				No						Unknown	No
				No						Unknown	No
				No						Unknown	No
				No						Unknown	No
				No						Unknown	No
				No						Unknown	No
				No						Unknown	No
				No						Unknown	No
				No						Unknown	No
				No						Unknown	No
				No						Unknown	No
				No						Unknown	No
				No						Unknown	No
				No						Unknown	No
				No						Unknown	No
				No						Unknown	No
				No						Unknown	No
				No						Unknown	No
				No						Unknown	No
				No						Unknown	No
				No						Unknown	No
				No						Unknown	No
				No						Unknown	No
				No						Unknown	No
				No						Unknown	No
				No						Unknown	No
				No						Unknown	No
				No						Unknown	No
				No						Unknown	No
				No						Unknown	No
				No						Unknown	No
				No						Unknown	No
				No						Unknown	No
				No						Unknown	No
				No						Unknown	No
				No						Unknown	No
				No						Unknown	No
				No						Unknown	No
				No						Unknown	No
				No						Unknown	No
				No						Unknown	No
				No						Unknown	No
				No						Unknown	No
				No						Unknown	No
				No						Unknown	No
				No						Unknown	No
				No						Unknown	No
				No						Unknown	No
				No						Unknown	No
				No						Unknown	No
				No						Unknown	No
				No						Unknown	No
				No						Unknown	No
				No						Unknown	No
				No						Unknown	No
				No						Unknown	No
				No						Unknown	No
				No						Unknown	No
				No						Unknown	No
				No						Unknown	No
				No						Unknown	No
				No						Unknown	No
				No						Unknown	No
				No						Unknown	No
				No						Unknown	No
				No						Unknown	No
				No						Unknown	No
				No						Unknown	No
				No						Unknown	No
				No						Unknown	No
				No						Unknown	No
				No						Unknown	No
				No						Unknown	No
				No						Unknown	No
				No						Unknown	No
				No						Unknown	No
				No						Unknown	No
				No						Unknown	No
				No						Unknown	No
				No						Unknown	No
				No						Unknown	No
				No						Unknown	No
				No						Unknown	No
				No						Unknown	No
				No						Unknown	No
				No						Unknown	No
				No						Unknown	No
				No						Unknown	No
				No						Unknown	No
				No						Unknown	No
				No						Unknown	No
				No						Unknown	No
				No						Unknown	No
				No						Unknown	No
				No						Unknown	No
				No						Unknown	No
				No						Unknown	No
				No						Unknown	No
				No						Unknown	No
				No						Unknown	No
				No						Unknown	No
				No						Unknown	No
				No						Unknown	No
				No						Unknown	No
				No						Unknown	No
				No						Unknown	No
				No						Unknown	No
				No						Unknown	No
				No						Unknown	No
				No						Unknown	No
				No						Unknown	No
				No						Unknown	No
				No						Unknown	No
				No						Unknown	No
				No						Unknown	No
				No						Unknown	No
				No						Unknown	No
				No						Unknown	No
				No						Unknown	No
				No						Unknown	No
				No						Unknown	No
				No						Unknown	No
				No						Unknown	No
				No						Unknown	No
				No						Unknown	No
				No						Unknown	No
				No						Unknown	No
				No						Unknown	No
				No						Unknown	No
				No						Unknown	No
				No						Unknown	No
				No						Unknown	No
				No						Unknown	No
				No						Unknown	No
				No						Unknown	No
				No						Unknown	No
				No						Unknown	No
				No						Unknown	No
				No						Unknown	No
				No						Unknown	No
				No						Unknown	No
				No						Unknown	No
				No						Unknown	No
				No						Unknown	No
				No						Unknown	No
				No						Unknown	No
				No						Unknown	No
				No						Unknown	No
				No						Unknown	No
				No						Unknown	No
				No						Unknown	No
				No						Unknown	No
				No						Unknown	No
				No						Unknown	No
				No						Unknown	No
				No						Unknown	No
				No						Unknown	No
				No						Unknown	No
				No						Unknown	No
				No						Unknown	No
				No						Unknown	No
				No						Unknown	No
				No						Unknown	No
				No						Unknown	No
				No						Unknown	No
				No						Unknown	No
				No						Unknown	No
				No						Unknown	No
				No						Unknown	No
				No						Unknown	No
				No						Unknown	No
				No						Unknown	No
				No						Unknown	No
				No						Unknown	No
				No						Unknown	No
				No						Unknown	No
				No						Unknown	No
				No						Unknown	No
				No						Unknown	No
				No						Unknown	No
				No						Unknown	No
				No						Unknown	No
				No						Unknown	No
				No						Unknown	No
				No						Unknown	No
				No						Unknown	No
				No						Unknown	No
				No						Unknown	No
				No						Unknown	No
				No						Unknown	No
				No						Unknown	No
				No						Unknown	No
				No						Unknown	No
				No						Unknown	No
				No						Unknown	No
				No						Unknown	No
				No						Unknown	No
				No						Unknown	No
				No						Unknown	No
				No						Unknown	No
				No						Unknown	No
				No						Unknown	No
				No						Unknown	No
				No						Unknown	No
				No						Unknown	No
				No						Unknown	No
				No						Unknown	No
				No						Unknown	No
				No						Unknown	No
				No						Unknown	No
				No						Unknown	No
				No						Unknown	No
				No						Unknown	No
				No						Unknown	No
				No						Unknown	No
				No						Unknown	No
				No						Unknown	No
				No						Unknown	No
				No						Unknown	No
				No						Unknown	No
				No						Unknown	No
				No						Unknown	No
				No						Unknown	No
				No						Unknown	No
				No						Unknown	No
				No						Unknown	No
				No						Unknown	No
				No						Unknown	No
				No						Unknown	No
				No						Unknown	No
				No						Unknown	No
				No						Unknown	No
				No						Unknown	No
				No						Unknown	No
				No						Unknown	No
				No						Unknown	No
				No						Unknown	No
				No						Unknown	No
				No						Unknown	No
				No						Unknown	No
				No						Unknown	No
				No						Unknown	No
				No						Unknown	No
				No						Unknown	No
				No						Unknown	No
				No						Unknown	No
				No						Unknown	No
				No						Unknown	No
				No						Unknown	No
				No						Unknown	No
				No						Unknown	No
				No						Unknown	No
				No						Unknown	No
				No						Unknown	No
				No						Unknown	No
				No						Unknown	No
				No						Unknown	No
				No						Unknown	No
				No						Unknown	No
				No						Unknown	No
				No						Unknown	No
				No						Unknown	No
				No						Unknown	No
				No						Unknown	No
				No						Unknown	No
				No						Unknown	No
				No						Unknown	No
				No						Unknown	No
				No						Unknown	No
				No						Unknown	No
				No						Unknown	No
				No						Unknown	No
				No						Unknown	No
				No						Unknown	No
				No						Unknown	No
				No						Unknown	No
				No						Unknown	No
				No						Unknown	No
				No						Unknown	No
				No						Unknown	No
				No						Unknown	No
				No						Unknown	No
				No						Unknown	No
				No						Unknown	No
				No						Unknown	No
				No						Unknown	No
				No						Unknown	No
				No						Unknown	No
				No						Unknown	No
				No						Unknown	No
				No						Unknown	No
				No						Unknown	No
				No						Unknown	No
				No						Unknown	No
				No						Unknown	No
				No						Unknown	No
				No						Unknown	No
				No						Unknown	No
				No						Unknown	No
				No						Unknown	No
				No						Unknown	No
				No						Unknown	No
				No						Unknown	No
				No						Unknown	No
				No						Unknown	No
				No						Unknown	No
				No						Unknown	No
				No						Unknown	No
				No						Unknown	No
				No						Unknown	No
				No						Unknown	No
				No						Unknown	No
				No						Unknown	No
				No						Unknown	No
				No						Unknown	No
				No						Unknown	No
				No						Unknown	No
				No						Unknown	No
				No						Unknown	No
				No						Unknown	No
				No						Unknown	No
				No						Unknown	No
				No						Unknown	No
				No						Unknown	No
				No						Unknown	No
				No						Unknown	No
				No						Unknown	No
				No						Unknown	No
				No						Unknown	No
				No						Unknown	No
				No						Unknown	No
				No						Unknown	No
				No						Unknown	No
				No						Unknown	No
				No						Unknown	No
				No						Unknown	No
				No						Unknown	No
				No						Unknown	No
				No						Unknown	No
				No						Unknown	No
				No						Unknown	No
				No						Unknown	No
				No						Unknown	No
				No						Unknown	No
				No						Unknown	No
				No						Unknown	No
				No						Unknown	No
				No						Unknown	No
				No						Unknown	No
				No						Unknown	No
				No						Unknown	No
				No						Unknown	No
				No						Unknown	No
				No						Unknown	No
				No						Unknown	No
				No						Unknown	No
				No						Unknown	No
				No						Unknown	No
				No						Unknown	No
				No						Unknown	No
				No						Unknown	No
				No						Unknown	No
				No						Unknown	No
				No						Unknown	No
				No						Unknown	No
				No						Unknown	No
				No						Unknown	No
				No						Unknown	No
				No						Unknown	No
				No						Unknown	No
				No						Unknown	No
				No						Unknown	No
				No						Unknown	No
				No						Unknown	No
				No						Unknown	No
				No						Unknown	No
				No						Unknown	No
				No						Unknown	No
				No						Unknown	No
				No						Unknown	No
				No						Unknown	No
				No						Unknown	No
				No						Unknown	No
				No						Unknown	No
				No						Unknown	No
				No						Unknown	No
				No						Unknown	No
				No						Unknown	No
				No						Unknown	No
				No						Unknown	No
				No						Unknown	No
				No						Unknown	No
				No						Unknown	No
				No						Unknown	No
				No						Unknown	No
				No						Unknown	No
				No						Unknown	No
				No						Unknown	No
				No						Unknown	No
				No						Unknown	No
				No						Unknown	No
				No						Unknown	No
				No						Unknown	No
				No						Unknown	No
				No						Unknown	No
				No						Unknown	No
				No						Unknown	No
				No						Unknown	No
				No						Unknown	No
				No						Unknown	No
				No						Unknown	No
				No						Unknown	No
				No						Unknown	No
				No						Unknown	No
				No						Unknown	No
				No						Unknown	No
				No						Unknown	No
				No						Unknown	No
				No						Unknown	No
				No						Unknown	No
				No						Unknown	No
				No						Unknown	No
				No						Unknown	No
				No						Unknown	No
				No						Unknown	No
				No						Unknown	No
				No						Unknown	No
				No						Unknown	No
				No						Unknown	No
				No						Unknown	No
				No						Unknown	No
				No						Unknown	No
				No						Unknown	No
				No						Unknown	No
				No						Unknown	No
				No						Unknown	No
				No						Unknown	No
				No						Unknown	No
				No						Unknown	No
				No						Unknown	No
				No						Unknown	No
				No						Unknown	No
				No						Unknown	No
				No						Unknown	No
				No						Unknown	No
				No						Unknown	No
				No						Unknown	No
				No						Unknown	No
				No						Unknown	No
				No						Unknown	No
				No						Unknown	No
				No						Unknown	No
				No						Unknown	No
				No						Unknown	No
				No						Unknown	No
				No						Unknown	No
				No						Unknown	No
				No						Unknown	No
				No						Unknown	No
				No						Unknown	No
				No						Unknown	No
				No						Unknown	No
				No						Unknown	No
				No						Unknown	No
				No						Unknown	No
				No						Unknown	No
				No						Unknown	No
				No						Unknown	No
				No						Unknown	No
				No						Unknown	No
				No						Unknown	No
				No						Unknown	No
				No						Unknown	No
				No						Unknown	No
				No						Unknown	No
				No						Unknown	No
				No						Unknown	No
				No						Unknown	No
				No						Unknown	No
				No						Unknown	No
				No						Unknown	No
				No						Unknown	No
				No						Unknown	No
				No						Unknown	No
				No						Unknown	No
				No						Unknown	No
				No						Unknown	No
				No						Unknown	No
				No						Unknown	No
				No						Unknown	No
				No						Unknown	No
				No						Unknown	No
				No						Unknown	No
				No						Unknown	No
				No						Unknown	No
				No						Unknown	No
				No						Unknown	No
				No						Unknown	No
				No						Unknown	No
				No						Unknown	No
				No						Unknown	No
				No						Unknown	No
				No						Unknown	No
				No						Unknown	No
				No						Unknown	No
				No						Unknown	No
				No						Unknown	No
				No						Unknown	No
				No						Unknown	No
				No						Unknown	No
				No						Unknown	No
				No						Unknown	No
				No						Unknown	No
				No						Unknown	No
				No						Unknown	No
				No						Unknown	No
				No						Unknown	No
				No						Unknown	No
				No						Unknown	No
				No						Unknown	No
				No						Unknown	No
				No						Unknown	No
				No						Unknown	No
				No						Unknown	No
				No						Unknown	No
				No						Unknown	No
				No						Unknown	No
				No						Unknown	No
				No						Unknown	No
				No						Unknown	No
				No						Unknown	No
				No						Unknown	No
				No						Unknown	No
				No						Unknown	No
				No						Unknown	No
				No						Unknown	No
				No						Unknown	No
				No						Unknown	No
				No						Unknown	No
				No						Unknown	No
				No						Unknown	No
				No						Unknown	No
				No						Unknown	No
				No						Unknown	No
				No						Unknown	No
				No						Unknown	No
				No						Unknown	No
				No						Unknown	No
				No						Unknown	No
				No						Unknown	No
				No						Unknown	No
				No						Unknown	No
				No						Unknown	No
				No						Unknown	No
				No						Unknown	No
				No						Unknown	No
				No						Unknown	No
				No						Unknown	No
				No						Unknown	No
				No						Unknown	No
				No						Unknown	No
				No						Unknown	No
				No						Unknown	No
				No						Unknown	No
				No						Unknown	No
				No						Unknown	No
				No						Unknown	No
				No						Unknown	No
				No						Unknown	No
				No						Unknown	No
				No						Unknown	No
				No						Unknown	No
				No						Unknown	No
				No						Unknown	No
				No						Unknown	No
				No						Unknown	No
				No						Unknown	No
				No						Unknown	No
				No						Unknown	No
				No						Unknown	No
				No						Unknown	No
				No						Unknown	No
				No						Unknown	No
				No						Unknown	No
				No						Unknown	No
				No						Unknown	No
				No						Unknown	No
				No						Unknown	No
				No						Unknown	No
				No						Unknown	No
				No						Unknown	No
				No						Unknown	No
				No						Unknown	No
				No						Unknown	No
				No						Unknown	No
				No						Unknown	No
				No						Unknown	No
				No						Unknown	No
				No						Unknown	No
				No						Unknown	No
				No						Unknown	No
				No						Unknown	No
				No						Unknown	No
				No						Unknown	No
				No						Unknown	No
				No						Unknown	No
				No						Unknown	No
				No						Unknown	No
				No						Unknown	No
				No						Unknown	No
				No						Unknown	No
				No						Unknown	No
				No						Unknown	No
				No						Unknown	No
				No						Unknown	No
				No						Unknown	No
				No						Unknown	No
				No						Unknown	No
				No						Unknown	No
				No						Unknown	No
				No						Unknown	No
				No						Unknown	No
				No						Unknown	No
				No						Unknown	No
				No						Unknown	No
				No						Unknown	No
				No						Unknown	No
				No						Unknown	No
				No						Unknown	No
				No						Unknown	No
				No						Unknown	No
				No						Unknown	No
				No						Unknown	No
				No						Unknown	No
				No						Unknown	No
				No						Unknown	No
				No						Unknown	No
				No						Unknown	No
				No						Unknown	No
				No						Unknown	No
				No						Unknown	No
				No						Unknown	No
				No						Unknown	No
				No						Unknown	No
				No						Unknown	No
				No						Unknown	No
				No						Unknown	No
				No						Unknown	No
				No						Unknown	No
				No						Unknown	No
				No						Unknown	No
				No						Unknown	No
				No						Unknown	No
				No						Unknown	No
				No						Unknown	No
				No						Unknown	No
				No						Unknown	No
				No						Unknown	No
				No						Unknown	No
				No						Unknown	No
				No						Unknown	No
				No						Unknown	No
				No						Unknown	No
				No						Unknown	No
				No						Unknown	No
				No						Unknown	No
				No						Unknown	No
				No						Unknown	No
				No						Unknown	No
				No						Unknown	No
				No						Unknown	No
				No						Unknown	No
				No						Unknown	No
				No						Unknown	No
				No						Unknown	No
				No						Unknown	No
				No						Unknown	No
				No						Unknown	No
				No						Unknown	No
				No						Unknown	No
				No						Unknown	No
				No						Unknown	No
				No						Unknown	No
				No						Unknown	No
				No						Unknown	No
				No						Unknown	No
				No						Unknown	No
				No						Unknown	No
				No						Unknown	No
				No						Unknown	No
				No						Unknown	No
				No						Unknown	No
				No						Unknown	No
				No						Unknown	No
				No						Unknown	No
				No						Unknown	No
				No						Unknown	No
				No						Unknown	No
				No						Unknown	No
				No						Unknown	No
				No						Unknown	No
				No						Unknown	No
				No						Unknown	No
				No						Unknown	No
				No						Unknown	No
				No						Unknown	No
				No						Unknown	No
				No						Unknown	No
				No						Unknown	No
				No						Unknown	No
				No						Unknown	No
				No						Unknown	No
				No						Unknown	No
				No						Unknown	No
				No						Unknown	No
				No						Unknown	No
				No						Unknown	No
				No						Unknown	No
				No						Unknown	No
				No						Unknown	No
				No						Unknown	No
				No						Unknown	No
				No						Unknown	No
				No						Unknown	No
				No						Unknown	No
				No						Unknown	No
				No						Unknown	No
				No						Unknown	No
				No						Unknown	No
				No						Unknown	No
				No						Unknown	No
				No						Unknown	No
				No						Unknown	No
				No						Unknown	No
				No						Unknown	No
				No						Unknown	No
				No						Unknown	No
				No						Unknown	No
				No						Unknown	No
				No						Unknown	No
				No						Unknown	No
				No						Unknown	No
				No						Unknown	No
				No						Unknown	No
				No						Unknown	No
				No						Unknown	No
				No						Unknown	No
				No						Unknown	No
				No						Unknown	No
				No						Unknown	No
				No						Unknown	No
				No						Unknown	No
				No						Unknown	No
				No						Unknown	No
				No						Unknown	No
				No						Unknown	No
				No						Unknown	No
				No						Unknown	No
				No						Unknown	No
				No						Unknown	No
				No						Unknown	No
				No						Unknown	No
				No						Unknown	No
				No						Unknown	No
				No						Unknown	No
				No						Unknown	No
				No						Unknown	No
				No						Unknown	No
				No						Unknown	No
				No						Unknown	No
				No						Unknown	No
				No						Unknown	No
				No						Unknown	No
				No						Unknown	No
				No						Unknown	No
				No						Unknown	No
				No						Unknown	No
				No						Unknown	No
				No						Unknown	No
				No						Unknown	No
				No						Unknown	No
				No						Unknown	No
				No						Unknown	No
				No						Unknown	No
				No						Unknown	No
				No						Unknown	No
				No						Unknown	No
				No						Unknown	No
				No						Unknown	No
				No						Unknown	No
				No						Unknown	No
				No						Unknown	No
				No						Unknown	No
				No						Unknown	No
				No						Unknown	No
				No						Unknown	No
				No						Unknown	No
				No						Unknown	No
				No						Unknown	No
				No						Unknown	No
				No						Unknown	No
				No						Unknown	No
				No						Unknown	No
				No						Unknown	No
				No						Unknown	No
				No						Unknown	No
				No						Unknown	No
				No						Unknown	No
				No						Unknown	No
				No						Unknown	No
				No						Unknown	No
				No						Unknown	No
				No						Unknown	No
				No						Unknown	No
				No						Unknown	No
				No						Unknown	No
				No						Unknown	No
				No						Unknown	No
				No						Unknown	No
				No						Unknown	No
				No						Unknown	No
				No						Unknown	No
				No						Unknown	No
				No						Unknown	No
				No						Unknown	No
				No						Unknown	No
				No						Unknown	No
				No						Unknown	No
				No						Unknown	No
				No						Unknown	No
				No						Unknown	No
				No						Unknown	No
				No						Unknown	No
				No						Unknown	No
				No						Unknown	No
				No						Unknown	No
				No						Unknown	No
				No						Unknown	No
				No						Unknown	No
				No						Unknown	No
				No						Unknown	No
				No						Unknown	No
				No						Unknown	No
				No						Unknown	No
				No						Unknown	No
				No						Unknown	No
				No						Unknown	No
				No						Unknown	No
				No						Unknown	No
				No						Unknown	No
				No						Unknown	No
				No						Unknown	No
				No						Unknown	No
				No						Unknown	No
				No						Unknown	No
				No						Unknown	No
				No						Unknown	No
				No						Unknown	No
				No						Unknown	No
				No						Unknown	No
				No						Unknown	No
				No						Unknown	No
				No						Unknown	No
				No						Unknown	No
				No						Unknown	No
				No						Unknown	No
				No						Unknown	No
				No						Unknown	No
				No						Unknown	No
				No						Unknown	No
				No						Unknown	No
				No						Unknown	No
				No						Unknown	No
				No						Unknown	No
				No						Unknown	No
				No						Unknown	No
				No						Unknown	No
				No						Unknown	No
				No						Unknown	No
				No						Unknown	No
				No						Unknown	No
				No						Unknown	No
				No						Unknown	No
				No						Unknown	No
				No						Unknown	No
				No						Unknown	No
				No						Unknown	No
				No						Unknown	No
				No						Unknown	No
				No						Unknown	No
				No						Unknown	No
				No						Unknown	No
				No						Unknown	No
				No						Unknown	No
				No						Unknown	No
				No						Unknown	No
				No						Unknown	No
				No						Unknown	No
				No						Unknown	No
				No						Unknown	No
				No						Unknown	No
				No						Unknown	No
				No						Unknown	No
				No						Unknown	No
				No						Unknown	No
				No						Unknown	No
				No						Unknown	No
				No						Unknown	No
				No						Unknown	No
[truncated: 1,046,312+ more rows]
