# Supplementary material for: Demography and homing behavior in the poorly-known Philippine flat-headed frog Barbourula busuangensis (Anura: Bombinatoridae)
Source: PeerJ. 2025 Jan 14;13:e18694. doi: 10.7717/peerj.18694 (PMC11740736; doi:10.7717/peerj.18694)
Supplement: Supplemental Information 12 — Sheet1: matrix generated for Malbato; sheet2: input matrix for MARK; sheet3: matrix generated for San Rafael; and, sheet4: input matrix for MARK. 1= marked/recaptured, 0= no recapture. [file peerj-13-18694-s012.xlsx]

## Sheet: Matrix Malbato
ID / DATE	2022-04-03	2022-04-05	2022-04-21	2022-04-25	2022-04-30	2022-05-11	2022-05-15	2022-05-19	2022-05-24	2022-05-26	2022-06-01	2022-06-20	2022-06-25	2022-07-04	2022-07-08	2022-07-11	2022-10-23	2022-10-27	2022-11-09	2022-11-12	2022-11-15	2022-11-23	2022-11-28	2022-12-01	2022-12-03	2022-12-05	2022-12-07	2023-04-11	2023-04-13	2023-04-22	2023-05-04	2023-05-06	2023-05-11	2023-05-17	2023-05-26	2023-06-09	2023-06-13	2023-06-16	2023-06-19	2023-06-21		Total recap		2022-04-03			capture history
0007D32A9B	1	0	0	0	0	0	0	0	0	0	0	0	0	0	0	0	0	0	0	0	0	0	0	0	0	0	0	0	1	1	0	0	1	0	0	0	0	0	0	0		4		2022-04-05	2		1000000000000000000000000000110010000000 1; /* 0007D32A9B */
0007E54A85	1	0	0	0	0	0	1	0	1	1	0	1	0	1	0	0	0	1	0	0	0	0	0	0	0	0	0	0	0	0	0	0	0	0	0	0	0	0	0	0		7		2022-04-21	16		1000001011010100010000000000000000000000 1; /* 0007E54A85 */
0007E90138	1	0	0	0	0	0	0	1	0	0	0	0	0	0	1	0	0	0	0	0	0	0	0	0	0	0	0	0	0	0	0	0	0	0	0	0	0	0	0	0		3		2022-04-25	4		1000000100000010000000000000000000000000 1; /* 0007E90138 */
0007D5DD5A	1	0	0	0	0	0	0	0	0	0	0	0	0	0	0	0	0	0	0	0	0	0	0	0	0	0	0	0	0	0	0	0	0	0	0	0	0	0	0	0		1		2022-04-30	5		1000000000000000000000000000000000000000 1; /* 0007D5DD5A */
0007D5FAE4	1	0	0	0	0	0	0	0	0	0	0	0	0	0	1	0	0	0	0	0	0	0	0	0	0	0	0	0	1	0	0	0	0	0	0	0	0	0	0	0		3		2022-05-11	11		1000000000000010000000000000100000000000 1; /* 0007D5FAE4 */
0007E9E3CF	1	0	0	0	0	0	0	0	0	0	0	0	0	0	0	0	0	0	0	0	0	0	0	0	0	0	0	0	0	0	0	0	0	0	0	1	0	0	0	0		2		2022-05-15	4		1000000000000000000000000000000000010000 1; /* 0007E9E3CF */
0007D5BB8E	1	0	0	0	0	0	0	0	0	0	0	0	0	0	0	0	0	0	0	0	0	0	0	0	0	0	0	0	0	0	0	0	0	0	0	0	0	0	0	1		2		2022-05-19	4		1000000000000000000000000000000000000001 1; /* 0007D5BB8E */
0007E4C1A4	0	1	0	0	0	0	0	0	0	0	1	0	0	0	0	0	0	0	0	1	0	0	0	1	0	1	1	0	0	1	1	0	1	1	0	1	1	0	1	1		14		2022-05-24	5		0100000000100000000100010110011011011011 1; /* 0007E4C1A4 */
0007E53D51	0	1	0	0	0	0	0	0	0	0	0	0	0	0	0	0	0	0	0	0	0	0	0	0	0	0	0	0	0	0	0	0	0	0	0	0	0	0	0	0		1		2022-05-26	2		0100000000000000000000000000000000000000 1; /* 0007E53D51 */
0007D3E099	0	1	0	0	0	0	0	0	0	0	0	0	0	0	0	0	0	0	0	0	0	0	0	0	0	0	0	0	0	0	0	0	0	0	0	0	0	0	0	0		1		2022-06-01	6		0100000000000000000000000000000000000000 1; /* 0007D3E099 */
0007D34CD1	0	1	1	0	0	0	1	0	0	0	0	0	0	1	0	0	0	0	0	0	0	0	0	0	0	0	0	0	0	0	0	0	0	0	0	0	0	0	0	0		4		2022-06-20	19		0110001000000100000000000000000000000000 1; /* 0007D34CD1 */
0007E547C4	0	1	0	0	1	0	0	0	0	0	0	0	0	0	0	0	0	0	0	0	0	0	0	0	0	0	0	0	0	0	0	0	0	0	0	0	0	0	0	0		2		2022-06-25	5		0100100000000000000000000000000000000000 1; /* 0007E547C4 */
0007D3A0D5	0	1	0	0	0	0	0	0	0	0	0	0	0	0	0	0	0	0	0	0	0	0	0	0	0	0	0	0	0	0	0	0	0	0	0	0	0	0	0	0		1		2022-07-04	9		0100000000000000000000000000000000000000 1; /* 0007D3A0D5 */
0007E534CE	0	1	0	0	0	0	0	0	0	0	0	0	0	0	0	0	0	0	0	0	0	0	0	0	0	0	0	0	0	0	0	0	0	0	0	0	0	0	0	0		1		2022-07-08	4		0100000000000000000000000000000000000000 1; /* 0007E534CE */
0007D5DD5A	0	0	1	0	0	0	0	0	0	0	0	0	0	0	0	0	0	0	0	0	0	0	0	0	0	0	0	0	0	0	0	0	0	0	0	0	0	0	0	0		1		2022-07-11	3		0010000000000000000000000000000000000000 1; /* 0007D5DD5A */
0007D5CFC1	0	0	1	0	0	0	0	0	0	0	0	0	0	0	0	0	0	0	0	0	0	0	0	0	0	0	0	0	0	0	0	0	0	1	0	0	0	0	0	0		2		2022-10-23	104		0010000000000000000000000000000001000000 1; /* 0007D5CFC1 */
0007D5DA59	0	0	1	0	0	0	0	0	0	0	0	0	0	0	0	0	0	0	0	0	0	0	0	0	0	0	0	0	0	0	0	0	0	0	0	0	0	0	0	0		1		2022-10-27	4		0010000000000000000000000000000000000000 1; /* 0007D5DA59 */
0007D33AEC	0	0	1	0	0	0	0	0	0	0	0	0	0	0	0	1	0	0	0	0	0	0	0	0	0	0	0	0	0	0	0	0	0	0	0	0	0	0	0	0		2		2022-11-09	13		0010000000000001000000000000000000000000 1; /* 0007D33AEC */
0007D2E5C7	0	0	1	1	0	0	0	0	0	0	0	0	0	0	0	0	0	1	0	0	0	0	0	1	0	0	1	0	0	0	0	0	0	0	0	0	0	0	0	0		5		2022-11-12	3		0011000000000000010000010010000000000000 1; /* 0007D2E5C7 */
0007D33806	0	0	1	0	0	0	1	0	0	0	0	0	0	0	0	0	0	0	0	0	0	0	0	0	0	0	0	0	1	0	0	0	0	0	0	0	0	0	0	0		3		2022-11-15	3		0010001000000000000000000000100000000000 1; /* 0007D33806 */
0007D3972C	0	0	1	0	0	0	0	0	0	0	0	0	0	0	0	0	0	0	0	0	0	0	0	0	0	0	0	0	0	0	0	0	0	0	0	0	0	0	0	1		2		2022-11-23	8		0010000000000000000000000000000000000001 1; /* 0007D3972C */
0007D5EDF1	0	0	1	1	0	0	0	0	0	0	0	0	0	0	1	0	0	0	0	0	0	0	0	0	0	0	0	0	0	0	0	0	0	0	0	0	0	0	0	0		3		2022-11-28	5		0011000000000010000000000000000000000000 1; /* 0007D5EDF1 */
0007D5D2D3	0	0	1	0	0	0	0	0	0	0	0	0	0	0	0	0	0	0	0	0	0	0	0	0	0	0	0	0	0	0	0	0	0	0	0	0	0	0	0	0		1		2022-12-01	3		0010000000000000000000000000000000000000 1; /* 0007D5D2D3 */
0007D33339	0	0	1	0	0	0	0	0	0	0	0	0	0	0	0	0	0	0	0	0	0	0	0	0	0	0	0	0	0	0	0	0	0	0	0	0	0	0	0	0		1		2022-12-03	2		0010000000000000000000000000000000000000 1; /* 0007D33339 */
0007D2BC83	0	0	1	0	0	0	0	0	0	0	0	0	0	0	0	0	0	0	0	0	0	0	0	0	0	0	0	0	0	0	0	0	0	0	0	0	0	0	0	0		1		2022-12-05	2		0010000000000000000000000000000000000000 1; /* 0007D2BC83 */
0007D3AD78	0	0	1	0	0	0	0	0	0	0	0	0	0	0	0	0	0	0	0	1	0	0	0	0	0	0	0	0	0	0	0	0	0	0	0	0	0	0	0	0		2		2022-12-07	2		0010000000000000000100000000000000000000 1; /* 0007D3AD78 */
0007D5E587	0	0	0	1	0	0	0	0	0	0	0	0	0	0	0	0	0	0	0	0	0	0	0	0	0	0	0	0	0	0	0	0	0	0	0	0	0	0	0	0		1		2023-04-11	125		0001000000000000000000000000000000000000 1; /* 0007D5E587 */
0007D5F174	0	0	0	1	0	0	1	0	1	0	0	0	0	0	1	0	0	0	1	0	1	0	0	1	0	0	0	0	0	0	0	0	0	0	0	0	0	0	0	0		7		2023-04-13	2		0001001010000010001010010000000000000000 1; /* 0007D5F174 */
0007D5DEC4	0	0	0	1	0	0	0	0	0	0	0	0	0	0	0	0	1	1	0	0	0	0	0	0	0	0	0	0	0	0	0	0	0	0	0	0	0	0	0	0		3		2023-04-22	9		0001000000000000110000000000000000000000 1; /* 0007D5DEC4 */
0007D5FA55	0	0	0	1	0	0	0	0	0	0	1	1	0	0	0	0	0	0	0	0	0	0	0	0	0	0	0	0	0	0	0	0	0	0	0	0	0	0	0	0		3		2023-05-04	12		0001000000110000000000000000000000000000 1; /* 0007D5FA55 */
0007D5FC98	0	0	0	1	0	0	0	0	0	0	0	0	1	0	0	0	0	0	0	0	0	0	0	0	0	1	1	0	0	0	0	0	0	0	0	1	0	0	0	0		5		2023-05-06	2		0001000000001000000000000110000000010000 1; /* 0007D5FC98 */
0007D5D7C7	0	0	0	1	0	0	0	0	0	0	0	0	0	0	0	0	0	0	0	0	0	0	0	0	0	0	0	0	0	0	0	0	0	0	0	0	0	0	0	0		1		2023-05-11	5		0001000000000000000000000000000000000000 1; /* 0007D5D7C7 */
0007D5ECDE	0	0	0	0	1	0	0	0	0	0	0	0	0	0	0	1	0	0	0	0	0	0	0	0	0	0	0	0	0	0	0	0	0	0	0	0	0	0	0	0		2		2023-05-17	6		0000100000000001000000000000000000000000 1; /* 0007D5ECDE */
0007D60A81	0	0	0	0	1	0	0	1	0	0	0	0	0	0	0	0	0	0	0	0	0	0	0	0	0	0	1	0	1	0	0	0	0	0	0	0	0	0	0	0		4		2023-05-26	9		0000100100000000000000000010100000000000 1; /* 0007D60A81 */
0007D33212	0	0	0	0	1	0	0	0	0	1	0	0	0	0	1	0	0	0	0	0	0	0	0	0	0	0	0	0	0	0	0	0	0	0	0	0	0	0	0	0		3		2023-06-09	14		0000100001000010000000000000000000000000 1; /* 0007D33212 */
0007D39654	0	0	0	0	1	0	1	0	0	0	0	0	0	0	0	0	0	0	0	0	0	0	0	0	0	0	0	0	0	0	0	0	0	0	0	0	0	0	0	0		2		2023-06-13	4		0000101000000000000000000000000000000000 1; /* 0007D39654 */
0007D5BE77	0	0	0	0	0	1	0	0	0	0	0	0	0	0	0	0	0	0	0	0	0	0	0	0	0	0	0	0	0	0	0	0	0	0	0	0	0	0	0	0		1		2023-06-16	3		0000010000000000000000000000000000000000 1; /* 0007D5BE77 */
0007D5EB12	0	0	0	0	0	1	0	0	0	0	0	0	0	0	0	0	0	0	0	0	0	0	0	0	0	0	0	0	0	0	0	0	0	0	0	0	0	0	0	0		1		2023-06-19	3		0000010000000000000000000000000000000000 1; /* 0007D5EB12 */
0007D2C649	0	0	0	0	0	1	0	0	0	0	0	0	0	0	0	0	0	0	0	0	0	0	0	0	0	0	0	0	0	0	0	0	0	0	0	0	0	0	0	0		1		2023-06-21	2		0000010000000000000000000000000000000000 1; /* 0007D2C649 */
0007D3A69D	0	0	0	0	0	0	1	0	0	0	0	0	0	0	0	0	0	0	0	0	0	0	0	0	0	0	0	0	0	0	0	0	0	0	0	0	0	0	0	0		1					0000001000000000000000000000000000000000 1; /* 0007D3A69D */
0007D48482	0	0	0	0	0	0	1	1	1	1	0	1	1	1	1	0	0	0	0	0	0	0	0	0	0	0	0	0	1	1	0	0	0	1	0	0	0	0	0	0		11					0000001111011110000000000000110001000000 1; /* 0007D48482 */
0007D5BA1E	0	0	0	0	0	0	1	0	0	0	0	0	0	0	0	0	0	0	0	0	0	0	0	0	1	0	0	0	0	0	0	0	0	0	0	0	0	0	0	0		2					0000001000000000000000001000000000000000 1; /* 0007D5BA1E */
0007D5ED75	0	0	0	0	0	0	1	0	0	0	0	0	0	0	0	0	0	0	0	0	0	0	0	0	0	0	0	0	0	0	0	1	0	0	0	0	0	0	0	0		2					0000001000000000000000000000000100000000 1; /* 0007D5ED75 */
0007D5F86D	0	0	0	0	0	0	1	0	0	0	0	0	0	0	0	0	0	0	0	0	0	0	0	0	0	0	0	0	0	0	0	0	0	0	0	0	0	0	0	0		1					0000001000000000000000000000000000000000 1; /* 0007D5F86D */
0007D33314	0	0	0	0	0	0	1	0	0	0	0	0	0	0	0	0	0	1	0	0	0	0	0	0	0	0	0	0	0	0	0	0	0	0	0	0	0	0	0	1		3					0000001000000000010000000000000000000001 1; /* 0007D33314 */
0007D2CEE6	0	0	0	0	0	0	1	0	1	0	0	1	0	0	0	0	1	0	1	1	1	1	1	1	1	0	1	0	0	0	0	0	0	0	0	0	0	0	0	0		12					0000001010010000101111111010000000000000 1; /* 0007D2CEE6 */
0007D2DC67	0	0	0	0	0	0	1	0	0	0	0	0	1	0	0	0	0	0	0	0	0	1	0	0	0	0	0	0	0	0	0	0	0	0	0	1	0	0	0	1		5					0000001000001000000001000000000000010001 1; /* 0007D2DC67 */
0007D5F114	0	0	0	0	0	0	1	0	0	0	1	0	0	0	0	1	0	0	0	1	0	0	0	0	0	0	0	0	0	0	0	0	0	0	0	0	0	0	0	1		5					0000001000100001000100000000000000000001 1; /* 0007D5F114 */
0007D5D6F9	0	0	0	0	0	0	1	0	0	0	0	0	0	0	0	0	0	0	0	0	0	0	0	0	0	0	0	0	1	0	0	0	0	0	0	0	0	0	0	0		2					0000001000000000000000000000100000000000 1; /* 0007D5D6F9 */
0007D5E4C4	0	0	0	0	0	0	0	1	0	0	0	0	0	0	0	0	0	0	0	0	0	0	0	0	0	0	0	0	0	0	0	0	0	0	0	0	0	0	0	0		1					0000000100000000000000000000000000000000 1; /* 0007D5E4C4 */
0007D2DA72	0	0	0	0	0	0	0	1	0	0	0	0	0	0	0	0	0	0	0	0	0	0	0	0	0	0	0	0	0	0	0	0	0	0	0	0	0	0	0	1		2					0000000100000000000000000000000000000001 1; /* 0007D2DA72 */
0007D5E7B2	0	0	0	0	0	0	0	1	0	0	0	0	0	0	1	1	0	1	0	0	0	0	0	0	0	0	0	0	0	0	0	0	0	0	0	0	0	0	0	0		4					0000000100000011010000000000000000000000 1; /* 0007D5E7B2 */
0007D5E88D	0	0	0	0	0	0	0	1	0	0	1	1	1	0	1	0	0	0	0	0	0	0	0	0	0	0	0	0	0	0	0	0	0	0	0	0	0	0	0	0		5					0000000100111010000000000000000000000000 1; /* 0007D5E88D */
0007D39402	0	0	0	0	0	0	0	1	0	0	0	0	0	0	0	0	0	0	1	0	0	0	0	0	0	0	0	0	0	0	0	0	0	0	0	0	0	0	0	0		2					0000000100000000001000000000000000000000 1; /* 0007D39402 */
0007D2B9C1	0	0	0	0	0	0	0	1	0	0	0	0	0	0	0	0	0	0	0	0	0	0	0	0	0	0	0	0	0	0	0	0	0	0	0	0	0	0	0	1		2					0000000100000000000000000000000000000001 1; /* 0007D2B9C1 */
0007D5DE37	0	0	0	0	0	0	0	1	0	0	0	0	0	0	0	0	0	0	0	0	0	0	0	0	0	0	0	0	0	0	0	0	0	0	0	0	0	0	0	0		1					0000000100000000000000000000000000000000 1; /* 0007D5DE37 */
0007D2CA3B	0	0	0	0	0	0	0	0	1	1	0	1	1	0	1	0	1	1	1	0	0	1	1	0	0	0	0	0	0	0	0	0	0	0	1	0	0	0	0	1		12					0000000011011010111001100000000000100001 1; /* 0007D2CA3B */
0007D5DCC6	0	0	0	0	0	0	0	0	1	1	0	0	0	0	0	1	0	1	1	0	1	0	0	0	0	0	0	0	0	0	0	0	0	0	0	0	0	0	0	0		6					0000000011000001011010000000000000000000 1; /* 0007D5DCC6 */
0007D628DD	0	0	0	0	0	0	0	0	0	1	0	0	0	0	0	0	0	0	0	0	0	0	0	0	0	0	0	0	0	0	0	0	0	0	0	0	0	0	0	0		1					0000000001000000000000000000000000000000 1; /* 0007D628DD */
0007D2CD97	0	0	0	0	0	0	0	0	0	0	1	0	0	0	0	0	0	0	0	0	0	0	0	0	0	0	0	0	0	0	0	0	0	0	0	0	0	0	0	0		1					0000000000100000000000000000000000000000 1; /* 0007D2CD97 */
0007D3DDD5	0	0	0	0	0	0	0	0	0	0	1	0	0	0	0	0	0	0	0	1	0	0	0	0	0	0	0	0	0	0	0	0	0	0	1	0	0	0	0	0		3					0000000000100000000100000000000000100000 1; /* 0007D3DDD5 */
0007D5E127	0	0	0	0	0	0	0	0	0	0	1	0	1	0	0	0	0	0	1	0	1	0	0	0	0	0	0	0	0	0	0	0	0	0	0	0	0	0	0	0		4					0000000000101000001010000000000000000000 1; /* 0007D5E127 */
0007D5DB13	0	0	0	0	0	0	0	0	0	0	1	1	1	0	0	0	0	0	0	1	0	1	0	0	0	0	0	0	0	0	1	0	0	0	0	0	0	1	0	0		7					0000000000111000000101000000001000000100 1; /* 0007D5DB13 */
0007D3367E	0	0	0	0	0	0	0	0	0	0	1	0	0	1	0	1	0	0	0	0	0	0	0	1	0	0	0	0	1	0	0	0	0	0	0	0	0	0	0	0		5					0000000000100101000000010000100000000000 1; /* 0007D3367E */
0007D612FD	0	0	0	0	0	0	0	0	0	0	1	0	0	0	0	0	0	0	0	0	0	0	0	0	0	0	0	0	0	0	0	0	0	0	0	0	0	0	0	0		1					0000000000100000000000000000000000000000 1; /* 0007D612FD */
0007D5E8F5	0	0	0	0	0	0	0	0	0	0	0	1	0	0	0	0	0	0	0	0	0	0	0	0	0	0	0	0	0	0	0	0	0	0	0	0	0	0	0	0		1					0000000000010000000000000000000000000000 1; /* 0007D5E8F5 */
0007D5D0E1	0	0	0	0	0	0	0	0	0	0	0	1	0	1	0	0	1	0	0	0	1	0	0	1	0	1	0	0	0	0	0	0	0	0	0	0	0	0	0	0		6					0000000000010100100010010100000000000000 1; /* 0007D5D0E1 */
0007D619B5	0	0	0	0	0	0	0	0	0	0	0	1	0	0	0	0	0	0	1	0	0	0	0	0	0	0	0	0	0	0	0	0	0	0	0	0	1	0	0	0		3					0000000000010000001000000000000000001000 1; /* 0007D619B5 */
0007D5D3CC	0	0	0	0	0	0	0	0	0	0	0	0	1	0	0	0	0	0	0	0	0	0	0	0	0	0	0	0	0	0	0	0	0	0	0	0	0	0	0	0		1					0000000000001000000000000000000000000000 1; /* 0007D5D3CC */
0007D5D776	0	0	0	0	0	0	0	0	0	0	0	0	1	0	0	0	0	0	0	0	0	0	0	0	0	0	0	0	0	0	0	0	0	0	0	0	0	0	0	0		1					0000000000001000000000000000000000000000 1; /* 0007D5D776 */
0007D5F436	0	0	0	0	0	0	0	0	0	0	0	0	1	0	0	0	0	0	0	0	0	0	0	0	0	0	0	0	0	0	0	0	0	0	0	0	0	0	0	0		1					0000000000001000000000000000000000000000 1; /* 0007D5F436 */
0007D2E94B	0	0	0	0	0	0	0	0	0	0	0	0	1	0	0	0	0	0	1	0	0	0	0	0	0	0	0	0	0	0	0	0	0	0	0	0	1	0	0	0		3					0000000000001000001000000000000000001000 1; /* 0007D2E94B */
0007D5E736	0	0	0	0	0	0	0	0	0	0	0	0	1	0	0	0	0	0	0	0	0	0	0	0	0	0	0	0	0	0	0	0	0	0	0	0	0	0	0	0		1					0000000000001000000000000000000000000000 1; /* 0007D5E736 */
0007D61730	0	0	0	0	0	0	0	0	0	0	0	0	1	0	0	0	0	0	0	0	0	0	0	0	0	0	0	0	0	0	0	0	0	0	0	0	0	0	0	0		1					0000000000001000000000000000000000000000 1; /* 0007D61730 */
0007D5CF96	0	0	0	0	0	0	0	0	0	0	0	0	1	0	0	0	0	0	0	0	0	0	0	1	0	0	0	0	0	0	1	0	0	0	0	0	0	0	0	0		3					0000000000001000000000010000001000000000 1; /* 0007D5CF96 */
0007D5FFFA	0	0	0	0	0	0	0	0	0	0	0	0	0	1	0	0	0	0	0	0	0	0	0	0	0	0	0	0	0	0	0	0	0	0	0	0	0	0	0	0		1					0000000000000100000000000000000000000000 1; /* 0007D5FFFA */
0007D5F116	0	0	0	0	0	0	0	0	0	0	0	0	0	1	0	0	0	0	0	0	0	1	0	0	0	0	0	0	0	0	0	0	0	0	0	1	0	0	0	0		3					0000000000000100000001000000000000010000 1; /* 0007D5F116 */
0007D5FA8F	0	0	0	0	0	0	0	0	0	0	0	0	0	1	1	0	0	1	0	0	0	0	0	0	0	0	0	0	0	0	0	0	0	0	0	1	0	1	1	1		7					0000000000000110010000000000000000010111 1; /* 0007D5FA8F */
0007D5EA75	0	0	0	0	0	0	0	0	0	0	0	0	0	1	0	0	0	0	0	0	0	0	0	0	0	0	0	0	0	0	0	0	0	0	0	0	0	0	0	0		1					0000000000000100000000000000000000000000 1; /* 0007D5EA75 */
0007D2C636	0	0	0	0	0	0	0	0	0	0	0	0	0	1	0	0	0	0	0	0	0	0	0	0	0	0	0	0	0	0	0	1	0	0	0	0	0	0	0	0		2					0000000000000100000000000000000100000000 1; /* 0007D2C636 */
0007D5DC11	0	0	0	0	0	0	0	0	0	0	0	0	0	1	0	0	0	0	0	0	0	0	0	0	0	0	0	0	0	0	0	0	0	0	0	0	0	0	0	0		1					0000000000000100000000000000000000000000 1; /* 0007D5DC11 */
0007D5D8F8	0	0	0	0	0	0	0	0	0	0	0	0	0	1	0	0	0	1	0	0	0	0	0	0	0	0	0	0	0	0	0	0	0	0	0	0	0	0	0	0		2					0000000000000100010000000000000000000000 1; /* 0007D5D8F8 */
0007D615B4	0	0	0	0	0	0	0	0	0	0	0	0	0	1	0	0	0	0	0	0	0	0	0	0	0	0	0	0	0	0	0	0	0	0	0	0	0	0	0	1		2					0000000000000100000000000000000000000001 1; /* 0007D615B4 */
0007DF178F	0	0	0	0	0	0	0	0	0	0	0	0	0	0	1	0	0	0	0	0	0	0	0	0	0	0	0	0	0	0	0	0	0	0	0	0	0	0	0	0		1					0000000000000010000000000000000000000000 1; /* 0007DF178F */
0007DF1525	0	0	0	0	0	0	0	0	0	0	0	0	0	0	1	0	0	1	0	1	0	0	0	0	0	0	0	0	0	0	0	0	0	0	0	0	0	0	0	0		3					0000000000000010010100000000000000000000 1; /* 0007DF1525 */
0007D5CEB6	0	0	0	0	0	0	0	0	0	0	0	0	0	0	1	0	0	0	0	0	0	0	0	0	0	0	0	0	0	0	1	0	0	0	0	0	0	0	0	0		2					0000000000000010000000000000001000000000 1; /* 0007D5CEB6 */
0007DEAF3B	0	0	0	0	0	0	0	0	0	0	0	0	0	0	1	0	0	0	0	0	0	0	0	0	0	0	0	0	0	0	0	0	0	0	0	0	0	0	0	0		1					0000000000000010000000000000000000000000 1; /* 0007DEAF3B */
0007DEB547	0	0	0	0	0	0	0	0	0	0	0	0	0	0	1	0	1	1	0	0	1	0	0	0	1	0	0	0	0	0	0	0	0	0	0	0	0	0	0	0		5					0000000000000010110010001000000000000000 1; /* 0007DEB547 */
0007E0DA76	0	0	0	0	0	0	0	0	0	0	0	0	0	0	1	0	0	0	0	0	0	0	0	0	0	0	0	0	0	0	0	0	0	0	0	0	0	0	0	0		1					0000000000000010000000000000000000000000 1; /* 0007E0DA76 */
0007E0F0AA	0	0	0	0	0	0	0	0	0	0	0	0	0	0	0	1	0	0	0	0	0	0	0	0	0	0	0	0	0	0	0	0	0	0	0	0	0	0	0	0		1					0000000000000001000000000000000000000000 1; /* 0007E0F0AA */
0007E0EFCE	0	0	0	0	0	0	0	0	0	0	0	0	0	0	0	1	0	0	0	0	0	0	0	0	0	0	0	0	0	0	0	0	0	0	0	0	0	0	0	0		1					0000000000000001000000000000000000000000 1; /* 0007E0EFCE */
0007DEBF09	0	0	0	0	0	0	0	0	0	0	0	0	0	0	0	1	0	0	0	0	0	0	0	0	0	0	0	0	0	0	0	0	0	0	0	1	0	0	0	0		2					0000000000000001000000000000000000010000 1; /* 0007DEBF09 */
0007DEC102	0	0	0	0	0	0	0	0	0	0	0	0	0	0	0	0	1	0	0	0	0	0	0	0	0	0	0	0	0	0	0	0	0	0	0	0	0	0	0	0		1					0000000000000000100000000000000000000000 1; /* 0007DEC102 */
0007DEAC69	0	0	0	0	0	0	0	0	0	0	0	0	0	0	0	0	1	0	0	1	0	1	0	0	0	0	0	0	1	0	0	0	0	0	0	0	0	0	0	0		4					0000000000000000100101000000100000000000 1; /* 0007DEAC69 */
0007DEBFF9	0	0	0	0	0	0	0	0	0	0	0	0	0	0	0	0	1	0	0	0	0	0	0	0	0	0	0	0	0	0	0	0	0	0	0	0	0	0	0	0		1					0000000000000000100000000000000000000000 1; /* 0007DEBFF9 */
0007DF1BC8	0	0	0	0	0	0	0	0	0	0	0	0	0	0	0	0	1	0	0	0	0	0	0	0	0	0	0	0	0	0	0	0	0	0	0	0	0	0	0	1		2					0000000000000000100000000000000000000001 1; /* 0007DF1BC8 */
0007D5EAE1	0	0	0	0	0	0	0	0	0	0	0	0	0	0	0	0	1	1	0	0	0	0	0	0	0	0	0	0	0	0	0	0	0	0	0	0	0	0	0	0		2					0000000000000000110000000000000000000000 1; /* 0007D5EAE1 */
0007DEB504	0	0	0	0	0	0	0	0	0	0	0	0	0	0	0	0	1	0	1	0	0	0	0	0	0	0	0	0	0	0	0	0	0	0	0	0	0	0	0	0		2					0000000000000000101000000000000000000000 1; /* 0007DEB504 */
0007E0EE5F	0	0	0	0	0	0	0	0	0	0	0	0	0	0	0	0	1	0	0	0	0	0	0	0	0	0	0	0	0	0	0	0	0	0	0	0	1	0	0	0		2					0000000000000000100000000000000000001000 1; /* 0007E0EE5F */
0007D5EF06	0	0	0	0	0	0	0	0	0	0	0	0	0	0	0	0	1	0	0	0	0	0	1	0	0	0	0	0	0	0	0	0	0	0	0	0	0	0	0	0		2					0000000000000000100000100000000000000000 1; /* 0007D5EF06 */
0007DF1E44	0	0	0	0	0	0	0	0	0	0	0	0	0	0	0	0	1	0	0	0	0	0	0	0	0	0	0	0	0	0	0	0	0	0	0	0	0	0	0	0		1					0000000000000000100000000000000000000000 1; /* 0007DF1E44 */
0007D5E042	0	0	0	0	0	0	0	0	0	0	0	0	0	0	0	0	1	0	0	0	0	0	0	0	0	0	0	0	0	0	0	0	0	0	0	1	0	0	0	0		2					0000000000000000100000000000000000010000 1; /* 0007D5E042 */
0007D5D9A3	0	0	0	0	0	0	0	0	0	0	0	0	0	0	0	0	1	0	1	0	1	0	0	0	0	0	0	0	0	0	0	0	0	0	0	1	0	0	0	0		4					0000000000000000101010000000000000010000 1; /* 0007D5D9A3 */
0007D5E66E	0	0	0	0	0	0	0	0	0	0	0	0	0	0	0	0	0	1	0	0	0	0	0	0	0	0	0	0	0	0	0	0	0	0	0	0	0	0	0	0		1					0000000000000000010000000000000000000000 1; /* 0007D5E66E */
0007D5DEF8	0	0	0	0	0	0	0	0	0	0	0	0	0	0	0	0	0	1	0	0	0	0	0	0	0	0	0	0	0	0	0	0	0	0	0	0	0	0	0	0		1					0000000000000000010000000000000000000000 1; /* 0007D5DEF8 */
0007D3BFEA	0	0	0	0	0	0	0	0	0	0	0	0	0	0	0	0	0	1	1	0	0	0	0	0	0	0	0	0	0	0	0	0	0	0	0	0	0	0	0	0		2					0000000000000000011000000000000000000000 1; /* 0007D3BFEA */
40007DF17A9	0	0	0	0	0	0	0	0	0	0	0	0	0	0	0	0	0	1	0	0	0	0	0	0	0	0	0	0	0	0	0	0	0	0	0	0	0	0	1	0		2					0000000000000000010000000000000000000010 1; /* 40007DF17A9 */
0007DEAC11	0	0	0	0	0	0	0	0	0	0	0	0	0	0	0	0	0	1	0	0	0	0	0	0	0	0	1	0	0	0	0	0	0	0	0	0	0	0	0	0		2					0000000000000000010000000010000000000000 1; /* 0007DEAC11 */
0007E0D4BD	0	0	0	0	0	0	0	0	0	0	0	0	0	0	0	0	0	1	0	0	0	0	1	1	0	0	0	0	0	0	0	0	0	0	0	0	0	0	0	0		3					0000000000000000010000110000000000000000 1; /* 0007E0D4BD */
0007D5D772	0	0	0	0	0	0	0	0	0	0	0	0	0	0	0	0	0	1	0	0	0	0	0	0	0	0	0	0	0	0	0	0	0	0	0	0	0	0	0	0		1					0000000000000000010000000000000000000000 1; /* 0007D5D772 */
0007D2F441	0	0	0	0	0	0	0	0	0	0	0	0	0	0	0	0	0	0	1	0	0	0	0	0	0	0	0	0	0	0	0	0	0	0	0	0	0	0	0	0		1					0000000000000000001000000000000000000000 1; /* 0007D2F441 */
0007D5FD67	0	0	0	0	0	0	0	0	0	0	0	0	0	0	0	0	0	0	1	0	0	0	0	0	0	0	0	0	0	0	0	0	0	0	0	0	0	0	0	0		1					0000000000000000001000000000000000000000 1; /* 0007D5FD67 */
0007D5EB07	0	0	0	0	0	0	0	0	0	0	0	0	0	0	0	0	0	0	1	0	0	0	0	0	0	0	0	0	0	0	0	0	0	0	0	0	0	0	0	0		1					0000000000000000001000000000000000000000 1; /* 0007D5EB07 */
0007DEBC6F	0	0	0	0	0	0	0	0	0	0	0	0	0	0	0	0	0	0	1	0	0	0	0	0	0	0	0	0	0	0	0	0	0	0	0	0	0	0	0	0		1					0000000000000000001000000000000000000000 1; /* 0007DEBC6F */
0007D2C630	0	0	0	0	0	0	0	0	0	0	0	0	0	0	0	0	0	0	1	0	0	0	0	0	0	0	0	0	0	0	0	0	0	0	0	0	0	0	0	0		1					0000000000000000001000000000000000000000 1; /* 0007D2C630 */
0007E0F080	0	0	0	0	0	0	0	0	0	0	0	0	0	0	0	0	0	0	1	0	0	1	0	0	0	0	0	0	0	0	1	0	0	0	0	0	0	0	0	0		3					0000000000000000001001000000001000000000 1; /* 0007E0F080 */
0007DEB4D6	0	0	0	0	0	0	0	0	0	0	0	0	0	0	0	0	0	0	1	0	0	0	0	0	0	0	0	0	0	0	0	0	0	0	0	0	0	0	0	0		1					0000000000000000001000000000000000000000 1; /* 0007DEB4D6 */
0007D5D1DB	0	0	0	0	0	0	0	0	0	0	0	0	0	0	0	0	0	0	1	0	0	0	0	0	1	0	0	0	0	0	0	0	0	0	0	0	0	0	0	0		2					0000000000000000001000001000000000000000 1; /* 0007D5D1DB */
0007DF117E	0	0	0	0	0	0	0	0	0	0	0	0	0	0	0	0	0	0	1	0	0	0	0	0	0	0	0	0	0	0	0	0	0	0	0	0	0	0	0	0		1					0000000000000000001000000000000000000000 1; /* 0007DF117E */
0007D39902	0	0	0	0	0	0	0	0	0	0	0	0	0	0	0	0	0	0	0	1	0	0	0	0	0	0	0	0	0	0	0	0	0	0	0	0	0	0	0	0		1					0000000000000000000100000000000000000000 1; /* 0007D39902 */
0007DF1C9A	0	0	0	0	0	0	0	0	0	0	0	0	0	0	0	0	0	0	0	0	1	0	0	1	0	0	1	0	1	1	0	1	0	0	0	0	0	0	0	0		6					0000000000000000000010010010110100000000 1; /* 0007DF1C9A */
0007DECF0F	0	0	0	0	0	0	0	0	0	0	0	0	0	0	0	0	0	0	0	0	1	1	1	0	0	1	0	0	1	0	0	0	0	1	1	0	1	0	0	1		9					0000000000000000000011100100100001101001 1; /* 0007DECF0F */
0007D5CAEC	0	0	0	0	0	0	0	0	0	0	0	0	0	0	0	0	0	0	0	0	1	0	0	0	1	0	1	0	1	0	0	0	0	0	0	0	0	0	0	0		4					0000000000000000000010001010100000000000 1; /* 0007D5CAEC */
0007DEAB88	0	0	0	0	0	0	0	0	0	0	0	0	0	0	0	0	0	0	0	0	1	0	0	0	0	0	0	0	0	0	0	0	0	0	0	0	0	0	0	0		1					0000000000000000000010000000000000000000 1; /* 0007DEAB88 */
0007D5E863	0	0	0	0	0	0	0	0	0	0	0	0	0	0	0	0	0	0	0	0	1	0	0	0	0	0	0	0	0	0	0	0	0	0	0	0	0	0	0	0		1					0000000000000000000010000000000000000000 1; /* 0007D5E863 */
0007DECB79	0	0	0	0	0	0	0	0	0	0	0	0	0	0	0	0	0	0	0	0	1	0	0	0	0	0	0	0	0	0	0	0	0	0	0	0	0	0	0	0		1					0000000000000000000010000000000000000000 1; /* 0007DECB79 */
0007DF17A9	0	0	0	0	0	0	0	0	0	0	0	0	0	0	0	0	0	0	0	0	1	0	0	0	0	0	0	0	0	0	0	0	0	0	0	0	0	0	0	0		1					0000000000000000000010000000000000000000 1; /* 0007DF17A9 */
0007D33089	0	0	0	0	0	0	0	0	0	0	0	0	0	0	0	0	0	0	0	0	1	0	0	0	0	0	0	0	1	0	0	0	0	0	0	0	0	0	0	0		2					0000000000000000000010000000100000000000 1; /* 0007D33089 */
0007DECC30	0	0	0	0	0	0	0	0	0	0	0	0	0	0	0	0	0	0	0	0	1	0	0	0	0	0	0	0	0	0	1	1	1	0	0	0	0	0	1	0		5					0000000000000000000010000000001110000010 1; /* 0007DECC30 */
0007DF1D15	0	0	0	0	0	0	0	0	0	0	0	0	0	0	0	0	0	0	0	0	1	0	0	1	0	0	0	0	0	0	0	0	0	0	0	0	0	0	0	0		2					0000000000000000000010010000000000000000 1; /* 0007DF1D15 */
0007DEAC59	0	0	0	0	0	0	0	0	0	0	0	0	0	0	0	0	0	0	0	0	1	0	0	0	0	0	0	0	0	0	0	0	0	0	0	0	0	0	0	0		1					0000000000000000000010000000000000000000 1; /* 0007DEAC59 */
0007D3045A	0	0	0	0	0	0	0	0	0	0	0	0	0	0	0	0	0	0	0	0	1	0	0	0	0	0	0	0	0	0	0	0	0	0	0	0	0	0	0	1		2					0000000000000000000010000000000000000001 1; /* 0007D3045A */
0007D38ECF	0	0	0	0	0	0	0	0	0	0	0	0	0	0	0	0	0	0	0	0	1	0	0	0	0	0	0	0	0	0	0	0	0	0	0	0	0	0	0	0		1					0000000000000000000010000000000000000000 1; /* 0007D38ECF */
0007D2AE02	0	0	0	0	0	0	0	0	0	0	0	0	0	0	0	0	0	0	0	0	0	1	0	0	0	0	0	0	0	0	0	0	0	0	0	0	0	0	0	0		1					0000000000000000000001000000000000000000 1; /* 0007D2AE02 */
0007D2B0EE	0	0	0	0	0	0	0	0	0	0	0	0	0	0	0	0	0	0	0	0	0	1	0	0	0	0	0	0	0	0	0	0	0	0	0	0	0	0	0	0		1					0000000000000000000001000000000000000000 1; /* 0007D2B0EE */
0007D2B06C	0	0	0	0	0	0	0	0	0	0	0	0	0	0	0	0	0	0	0	0	0	1	0	0	0	0	0	0	1	0	0	1	0	0	0	0	0	0	0	0		3					0000000000000000000001000000100100000000 1; /* 0007D2B06C */
0007D2AFFE	0	0	0	0	0	0	0	0	0	0	0	0	0	0	0	0	0	0	0	0	0	1	0	0	0	0	0	0	0	0	0	0	0	0	0	0	0	0	0	0		1					0000000000000000000001000000000000000000 1; /* 0007D2AFFE */
0007D4592D	0	0	0	0	0	0	0	0	0	0	0	0	0	0	0	0	0	0	0	0	0	1	0	0	0	0	0	0	1	0	0	0	0	0	0	0	0	0	0	0		2					0000000000000000000001000000100000000000 1; /* 0007D4592D */
0007D45568	0	0	0	0	0	0	0	0	0	0	0	0	0	0	0	0	0	0	0	0	0	1	0	0	0	0	0	0	0	0	0	0	0	0	0	0	0	0	0	0		1					0000000000000000000001000000000000000000 1; /* 0007D45568 */
0007D2ACB2	0	0	0	0	0	0	0	0	0	0	0	0	0	0	0	0	0	0	0	0	0	0	1	0	0	0	0	0	0	0	0	0	0	0	0	0	0	0	0	0		1					0000000000000000000000100000000000000000 1; /* 0007D2ACB2 */
0007D2AC57	0	0	0	0	0	0	0	0	0	0	0	0	0	0	0	0	0	0	0	0	0	0	1	0	0	1	1	0	0	0	0	1	0	0	0	1	0	0	0	0		5					0000000000000000000000100110000100010000 1; /* 0007D2AC57 */
0007D46490	0	0	0	0	0	0	0	0	0	0	0	0	0	0	0	0	0	0	0	0	0	0	1	0	0	0	0	0	0	0	0	0	0	0	0	0	0	0	0	0		1					0000000000000000000000100000000000000000 1; /* 0007D46490 */
0007D2B074	0	0	0	0	0	0	0	0	0	0	0	0	0	0	0	0	0	0	0	0	0	0	1	1	1	0	0	0	0	0	0	1	0	0	0	0	0	0	0	1		5					0000000000000000000000111000000100000001 1; /* 0007D2B074 */
0007D2AFFA	0	0	0	0	0	0	0	0	0	0	0	0	0	0	0	0	0	0	0	0	0	0	0	1	0	0	0	0	0	0	0	0	0	0	0	0	0	0	0	0		1					0000000000000000000000010000000000000000 1; /* 0007D2AFFA */
0007D2ABA9	0	0	0	0	0	0	0	0	0	0	0	0	0	0	0	0	0	0	0	0	0	0	0	1	0	0	0	0	0	0	0	0	0	0	0	0	0	0	0	0		1					0000000000000000000000010000000000000000 1; /* 0007D2ABA9 */
0007D2AF3B	0	0	0	0	0	0	0	0	0	0	0	0	0	0	0	0	0	0	0	0	0	0	0	1	0	0	0	0	0	0	0	0	0	0	0	0	0	0	0	0		1					0000000000000000000000010000000000000000 1; /* 0007D2AF3B */
0007D2ADFD	0	0	0	0	0	0	0	0	0	0	0	0	0	0	0	0	0	0	0	0	0	0	0	1	0	0	0	0	0	0	0	0	0	0	0	0	0	0	0	0		1					0000000000000000000000010000000000000000 1; /* 0007D2ADFD */
0007D2B013	0	0	0	0	0	0	0	0	0	0	0	0	0	0	0	0	0	0	0	0	0	0	0	1	0	0	0	0	0	0	0	0	0	0	0	0	0	0	0	0		1					0000000000000000000000010000000000000000 1; /* 0007D2B013 */
0007D2AD29	0	0	0	0	0	0	0	0	0	0	0	0	0	0	0	0	0	0	0	0	0	0	0	0	1	0	0	0	0	0	0	0	0	0	0	0	0	0	0	0		1					0000000000000000000000001000000000000000 1; /* 0007D2AD29 */
0007D2AB8B	0	0	0	0	0	0	0	0	0	0	0	0	0	0	0	0	0	0	0	0	0	0	0	0	0	1	0	0	0	0	0	0	0	0	0	0	0	0	0	0		1					0000000000000000000000000100000000000000 1; /* 0007D2AB8B */
0007D2AF9D	0	0	0	0	0	0	0	0	0	0	0	0	0	0	0	0	0	0	0	0	0	0	0	0	0	1	0	0	0	0	0	0	0	1	0	0	0	0	0	0		2					0000000000000000000000000100000001000000 1; /* 0007D2AF9D */
0007D2AFEA	0	0	0	0	0	0	0	0	0	0	0	0	0	0	0	0	0	0	0	0	0	0	0	0	0	0	1	0	0	0	0	0	0	0	0	0	0	0	0	0		1					0000000000000000000000000010000000000000 1; /* 0007D2AFEA */
0007D2ACE4	0	0	0	0	0	0	0	0	0	0	0	0	0	0	0	0	0	0	0	0	0	0	0	0	0	0	1	0	0	0	0	0	0	0	0	0	0	0	0	0		1					0000000000000000000000000010000000000000 1; /* 0007D2ACE4 */
0007DF1C9A	0	0	0	0	0	0	0	0	0	0	0	0	0	0	0	0	0	0	0	0	0	0	0	0	0	0	0	1	0	0	0	0	0	0	0	0	0	0	0	0		1					0000000000000000000000000001000000000000 1; /* 0007DF1C9A */
0007D5DF23	0	0	0	0	0	0	0	0	0	0	0	0	0	0	0	0	0	0	0	0	0	0	0	0	0	0	0	1	0	0	1	1	1	0	0	0	1	0	0	0		5					0000000000000000000000000001001110001000 1; /* 0007D5DF23 */
0007D2AE51	0	0	0	0	0	0	0	0	0	0	0	0	0	0	0	0	0	0	0	0	0	0	0	0	0	0	0	0	1	0	0	0	0	0	0	0	0	0	0	0		1					0000000000000000000000000000100000000000 1; /* 0007D2AE51 */
0007D45F47	0	0	0	0	0	0	0	0	0	0	0	0	0	0	0	0	0	0	0	0	0	0	0	0	0	0	0	0	1	0	0	0	0	0	0	0	0	0	0	0		1					0000000000000000000000000000100000000000 1; /* 0007D45F47 */
0007D2B025	0	0	0	0	0	0	0	0	0	0	0	0	0	0	0	0	0	0	0	0	0	0	0	0	0	0	0	0	1	0	0	0	0	0	0	0	0	0	0	0		1					0000000000000000000000000000100000000000 1; /* 0007D2B025 */
0007D2AF67	0	0	0	0	0	0	0	0	0	0	0	0	0	0	0	0	0	0	0	0	0	0	0	0	0	0	0	0	1	0	0	0	0	0	0	0	0	0	0	0		1					0000000000000000000000000000100000000000 1; /* 0007D2AF67 */
0007D2AF04	0	0	0	0	0	0	0	0	0	0	0	0	0	0	0	0	0	0	0	0	0	0	0	0	0	0	0	0	1	0	0	0	0	0	0	0	0	0	0	0		1					0000000000000000000000000000100000000000 1; /* 0007D2AF04 */
0007D2B0B8	0	0	0	0	0	0	0	0	0	0	0	0	0	0	0	0	0	0	0	0	0	0	0	0	0	0	0	0	1	0	0	0	0	0	0	0	0	0	0	0		1					0000000000000000000000000000100000000000 1; /* 0007D2B0B8 */
0007D2AF5E	0	0	0	0	0	0	0	0	0	0	0	0	0	0	0	0	0	0	0	0	0	0	0	0	0	0	0	0	0	1	0	0	0	1	0	0	0	0	0	0		2					0000000000000000000000000000010001000000 1; /* 0007D2AF5E */
0007D2AC50	0	0	0	0	0	0	0	0	0	0	0	0	0	0	0	0	0	0	0	0	0	0	0	0	0	0	0	0	0	1	0	0	0	0	1	0	0	0	0	0		2					0000000000000000000000000000010000100000 1; /* 0007D2AC50 */
0007D4961E	0	0	0	0	0	0	0	0	0	0	0	0	0	0	0	0	0	0	0	0	0	0	0	0	0	0	0	0	0	1	1	1	0	0	0	0	0	0	0	1		4					0000000000000000000000000000011100000001 1; /* 0007D4961E */
0007D2AC29	0	0	0	0	0	0	0	0	0	0	0	0	0	0	0	0	0	0	0	0	0	0	0	0	0	0	0	0	0	1	0	0	0	1	0	0	0	1	0	1		4					0000000000000000000000000000010001000101 1; /* 0007D2AC29 */
0007D2AF27	0	0	0	0	0	0	0	0	0	0	0	0	0	0	0	0	0	0	0	0	0	0	0	0	0	0	0	0	0	1	0	0	1	0	0	0	0	0	0	0		2					0000000000000000000000000000010010000000 1; /* 0007D2AF27 */
0007D2B0C9	0	0	0	0	0	0	0	0	0	0	0	0	0	0	0	0	0	0	0	0	0	0	0	0	0	0	0	0	0	1	1	0	0	0	0	0	0	0	0	0		2					0000000000000000000000000000011000000000 1; /* 0007D2B0C9 */
0007D4645B	0	0	0	0	0	0	0	0	0	0	0	0	0	0	0	0	0	0	0	0	0	0	0	0	0	0	0	0	0	1	0	0	0	0	0	0	0	0	0	0		1					0000000000000000000000000000010000000000 1; /* 0007D4645B */
0007D2B0C6	0	0	0	0	0	0	0	0	0	0	0	0	0	0	0	0	0	0	0	0	0	0	0	0	0	0	0	0	0	1	0	0	0	0	0	0	0	0	0	1		2					0000000000000000000000000000010000000001 1; /* 0007D2B0C6 */
0007D2ABDA	0	0	0	0	0	0	0	0	0	0	0	0	0	0	0	0	0	0	0	0	0	0	0	0	0	0	0	0	0	1	0	0	0	0	0	1	0	0	0	0		2					0000000000000000000000000000010000010000 1; /* 0007D2ABDA */
0007D2AF0F	0	0	0	0	0	0	0	0	0	0	0	0	0	0	0	0	0	0	0	0	0	0	0	0	0	0	0	0	0	1	0	0	0	0	1	0	0	0	0	0		2					0000000000000000000000000000010000100000 1; /* 0007D2AF0F */
0007D2AD78	0	0	0	0	0	0	0	0	0	0	0	0	0	0	0	0	0	0	0	0	0	0	0	0	0	0	0	0	0	0	1	0	1	1	0	0	0	0	0	0		3					0000000000000000000000000000001011000000 1; /* 0007D2AD78 */
0007D44FF7	0	0	0	0	0	0	0	0	0	0	0	0	0	0	0	0	0	0	0	0	0	0	0	0	0	0	0	0	0	0	1	0	0	0	0	0	0	0	0	0		1					0000000000000000000000000000001000000000 1; /* 0007D44FF7 */
0007D2ABC1	0	0	0	0	0	0	0	0	0	0	0	0	0	0	0	0	0	0	0	0	0	0	0	0	0	0	0	0	0	0	1	0	0	0	0	0	0	0	0	0		1					0000000000000000000000000000001000000000 1; /* 0007D2ABC1 */
0007D2AB6B	0	0	0	0	0	0	0	0	0	0	0	0	0	0	0	0	0	0	0	0	0	0	0	0	0	0	0	0	0	0	1	0	0	0	0	0	0	0	0	0		1					0000000000000000000000000000001000000000 1; /* 0007D2AB6B */
0007D2AFC8	0	0	0	0	0	0	0	0	0	0	0	0	0	0	0	0	0	0	0	0	0	0	0	0	0	0	0	0	0	0	0	1	0	1	0	0	1	0	1	0		4					0000000000000000000000000000000101001010 1; /* 0007D2AFC8 */
0007D2ACE1	0	0	0	0	0	0	0	0	0	0	0	0	0	0	0	0	0	0	0	0	0	0	0	0	0	0	0	0	0	0	0	1	0	0	0	0	1	0	0	0		2					0000000000000000000000000000000100001000 1; /* 0007D2ACE1 */
0007D2AD11	0	0	0	0	0	0	0	0	0	0	0	0	0	0	0	0	0	0	0	0	0	0	0	0	0	0	0	0	0	0	0	1	0	0	0	0	0	0	0	0		1					0000000000000000000000000000000100000000 1; /* 0007D2AD11 */
0007D2AC2B	0	0	0	0	0	0	0	0	0	0	0	0	0	0	0	0	0	0	0	0	0	0	0	0	0	0	0	0	0	0	0	1	0	0	0	0	0	0	0	0		1					0000000000000000000000000000000100000000 1; /* 0007D2AC2B */
0007D42D35	0	0	0	0	0	0	0	0	0	0	0	0	0	0	0	0	0	0	0	0	0	0	0	0	0	0	0	0	0	0	0	0	1	0	0	0	0	0	0	0		1					0000000000000000000000000000000010000000 1; /* 0007D42D35 */
0007D2AE09	0	0	0	0	0	0	0	0	0	0	0	0	0	0	0	0	0	0	0	0	0	0	0	0	0	0	0	0	0	0	0	0	1	0	0	0	0	0	0	0		1					0000000000000000000000000000000010000000 1; /* 0007D2AE09 */
0007D4B91A	0	0	0	0	0	0	0	0	0	0	0	0	0	0	0	0	0	0	0	0	0	0	0	0	0	0	0	0	0	0	0	0	1	1	0	0	0	0	0	0		2					0000000000000000000000000000000011000000 1; /* 0007D4B91A */
0007D2AD7C	0	0	0	0	0	0	0	0	0	0	0	0	0	0	0	0	0	0	0	0	0	0	0	0	0	0	0	0	0	0	0	0	1	0	0	0	0	0	1	0		2					0000000000000000000000000000000010000010 1; /* 0007D2AD7C */
0007D2AE68	0	0	0	0	0	0	0	0	0	0	0	0	0	0	0	0	0	0	0	0	0	0	0	0	0	0	0	0	0	0	0	0	0	1	0	0	0	0	0	0		1					0000000000000000000000000000000001000000 1; /* 0007D2AE68 */
0007D2AC2D	0	0	0	0	0	0	0	0	0	0	0	0	0	0	0	0	0	0	0	0	0	0	0	0	0	0	0	0	0	0	0	0	0	1	0	0	0	0	0	0		1					0000000000000000000000000000000001000000 1; /* 0007D2AC2D */
0007D45A2A	0	0	0	0	0	0	0	0	0	0	0	0	0	0	0	0	0	0	0	0	0	0	0	0	0	0	0	0	0	0	0	0	0	1	0	0	0	0	0	0		1					0000000000000000000000000000000001000000 1; /* 0007D45A2A */
0007D2AEB5	0	0	0	0	0	0	0	0	0	0	0	0	0	0	0	0	0	0	0	0	0	0	0	0	0	0	0	0	0	0	0	0	0	1	0	0	0	0	0	0		1					0000000000000000000000000000000001000000 1; /* 0007D2AEB5 */
0007D2AF44	0	0	0	0	0	0	0	0	0	0	0	0	0	0	0	0	0	0	0	0	0	0	0	0	0	0	0	0	0	0	0	0	0	0	1	0	0	0	0	0		1					0000000000000000000000000000000000100000 1; /* 0007D2AF44 */
0007D3E139	0	0	0	0	0	0	0	0	0	0	0	0	0	0	0	0	0	0	0	0	0	0	0	0	0	0	0	0	0	0	0	0	0	0	0	1	0	0	0	0		1					0000000000000000000000000000000000010000 1; /* 0007D3E139 */
0007D3A688	0	0	0	0	0	0	0	0	0	0	0	0	0	0	0	0	0	0	0	0	0	0	0	0	0	0	0	0	0	0	0	0	0	0	0	1	0	1	0	0		2					0000000000000000000000000000000000010100 1; /* 0007D3A688 */
0007D38EB8	0	0	0	0	0	0	0	0	0	0	0	0	0	0	0	0	0	0	0	0	0	0	0	0	0	0	0	0	0	0	0	0	0	0	0	1	0	0	0	0		1					0000000000000000000000000000000000010000 1; /* 0007D38EB8 */
0007D5DAEB	0	0	0	0	0	0	0	0	0	0	0	0	0	0	0	0	0	0	0	0	0	0	0	0	0	0	0	0	0	0	0	0	0	0	0	1	0	0	0	1		2					0000000000000000000000000000000000010001 1; /* 0007D5DAEB */
0007D5EEC1	0	0	0	0	0	0	0	0	0	0	0	0	0	0	0	0	0	0	0	0	0	0	0	0	0	0	0	0	0	0	0	0	0	0	0	1	0	0	0	0		1					0000000000000000000000000000000000010000 1; /* 0007D5EEC1 */
0007D60B2C	0	0	0	0	0	0	0	0	0	0	0	0	0	0	0	0	0	0	0	0	0	0	0	0	0	0	0	0	0	0	0	0	0	0	0	1	0	0	0	1		2					0000000000000000000000000000000000010001 1; /* 0007D60B2C */
0007D2BE63	0	0	0	0	0	0	0	0	0	0	0	0	0	0	0	0	0	0	0	0	0	0	0	0	0	0	0	0	0	0	0	0	0	0	0	0	1	0	0	1		2					0000000000000000000000000000000000001001 1; /* 0007D2BE63 */
0007D2B93D	0	0	0	0	0	0	0	0	0	0	0	0	0	0	0	0	0	0	0	0	0	0	0	0	0	0	0	0	0	0	0	0	0	0	0	0	1	0	0	0		1					0000000000000000000000000000000000001000 1; /* 0007D2B93D */
0007D339F2	0	0	0	0	0	0	0	0	0	0	0	0	0	0	0	0	0	0	0	0	0	0	0	0	0	0	0	0	0	0	0	0	0	0	0	0	1	0	0	0		1					0000000000000000000000000000000000001000 1; /* 0007D339F2 */

## Sheet: Malbato.inp
1000000000000000000000000000110010000000 1; /* 0007D32A9B */
1000001011010100010000000000000000000000 1; /* 0007E54A85 */
1000000100000010000000000000000000000000 1; /* 0007E90138 */
1000000000000000000000000000000000000000 1; /* 0007D5DD5A */
1000000000000010000000000000100000000000 1; /* 0007D5FAE4 */
1000000000000000000000000000000000010000 1; /* 0007E9E3CF */
1000000000000000000000000000000000000001 1; /* 0007D5BB8E */
0100000000100000000100010110011011011011 1; /* 0007E4C1A4 */
0100000000000000000000000000000000000000 1; /* 0007E53D51 */
0100000000000000000000000000000000000000 1; /* 0007D3E099 */
0110001000000100000000000000000000000000 1; /* 0007D34CD1 */
0100100000000000000000000000000000000000 1; /* 0007E547C4 */
0100000000000000000000000000000000000000 1; /* 0007D3A0D5 */
0100000000000000000000000000000000000000 1; /* 0007E534CE */
0010000000000000000000000000000000000000 1; /* 0007D5DD5A */
0010000000000000000000000000000001000000 1; /* 0007D5CFC1 */
0010000000000000000000000000000000000000 1; /* 0007D5DA59 */
0010000000000001000000000000000000000000 1; /* 0007D33AEC */
0011000000000000010000010010000000000000 1; /* 0007D2E5C7 */
0010001000000000000000000000100000000000 1; /* 0007D33806 */
0010000000000000000000000000000000000001 1; /* 0007D3972C */
0011000000000010000000000000000000000000 1; /* 0007D5EDF1 */
0010000000000000000000000000000000000000 1; /* 0007D5D2D3 */
0010000000000000000000000000000000000000 1; /* 0007D33339 */
0010000000000000000000000000000000000000 1; /* 0007D2BC83 */
0010000000000000000100000000000000000000 1; /* 0007D3AD78 */
0001000000000000000000000000000000000000 1; /* 0007D5E587 */
0001001010000010001010010000000000000000 1; /* 0007D5F174 */
0001000000000000110000000000000000000000 1; /* 0007D5DEC4 */
0001000000110000000000000000000000000000 1; /* 0007D5FA55 */
0001000000001000000000000110000000010000 1; /* 0007D5FC98 */
0001000000000000000000000000000000000000 1; /* 0007D5D7C7 */
0000100000000001000000000000000000000000 1; /* 0007D5ECDE */
0000100100000000000000000010100000000000 1; /* 0007D60A81 */
0000100001000010000000000000000000000000 1; /* 0007D33212 */
0000101000000000000000000000000000000000 1; /* 0007D39654 */
0000010000000000000000000000000000000000 1; /* 0007D5BE77 */
0000010000000000000000000000000000000000 1; /* 0007D5EB12 */
0000010000000000000000000000000000000000 1; /* 0007D2C649 */
0000001000000000000000000000000000000000 1; /* 0007D3A69D */
0000001111011110000000000000110001000000 1; /* 0007D48482 */
0000001000000000000000001000000000000000 1; /* 0007D5BA1E */
0000001000000000000000000000000100000000 1; /* 0007D5ED75 */
0000001000000000000000000000000000000000 1; /* 0007D5F86D */
0000001000000000010000000000000000000001 1; /* 0007D33314 */
0000001010010000101111111010000000000000 1; /* 0007D2CEE6 */
0000001000001000000001000000000000010001 1; /* 0007D2DC67 */
0000001000100001000100000000000000000001 1; /* 0007D5F114 */
0000001000000000000000000000100000000000 1; /* 0007D5D6F9 */
0000000100000000000000000000000000000000 1; /* 0007D5E4C4 */
0000000100000000000000000000000000000001 1; /* 0007D2DA72 */
0000000100000011010000000000000000000000 1; /* 0007D5E7B2 */
0000000100111010000000000000000000000000 1; /* 0007D5E88D */
0000000100000000001000000000000000000000 1; /* 0007D39402 */
0000000100000000000000000000000000000001 1; /* 0007D2B9C1 */
0000000100000000000000000000000000000000 1; /* 0007D5DE37 */
0000000011011010111001100000000000100001 1; /* 0007D2CA3B */
0000000011000001011010000000000000000000 1; /* 0007D5DCC6 */
0000000001000000000000000000000000000000 1; /* 0007D628DD */
0000000000100000000000000000000000000000 1; /* 0007D2CD97 */
0000000000100000000100000000000000100000 1; /* 0007D3DDD5 */
0000000000101000001010000000000000000000 1; /* 0007D5E127 */
0000000000111000000101000000001000000100 1; /* 0007D5DB13 */
0000000000100101000000010000100000000000 1; /* 0007D3367E */
0000000000100000000000000000000000000000 1; /* 0007D612FD */
0000000000010000000000000000000000000000 1; /* 0007D5E8F5 */
0000000000010100100010010100000000000000 1; /* 0007D5D0E1 */
0000000000010000001000000000000000001000 1; /* 0007D619B5 */
0000000000001000000000000000000000000000 1; /* 0007D5D3CC */
0000000000001000000000000000000000000000 1; /* 0007D5D776 */
0000000000001000000000000000000000000000 1; /* 0007D5F436 */
0000000000001000001000000000000000001000 1; /* 0007D2E94B */
0000000000001000000000000000000000000000 1; /* 0007D5E736 */
0000000000001000000000000000000000000000 1; /* 0007D61730 */
0000000000001000000000010000001000000000 1; /* 0007D5CF96 */
0000000000000100000000000000000000000000 1; /* 0007D5FFFA */
0000000000000100000001000000000000010000 1; /* 0007D5F116 */
0000000000000110010000000000000000010111 1; /* 0007D5FA8F */
0000000000000100000000000000000000000000 1; /* 0007D5EA75 */
0000000000000100000000000000000100000000 1; /* 0007D2C636 */
0000000000000100000000000000000000000000 1; /* 0007D5DC11 */
0000000000000100010000000000000000000000 1; /* 0007D5D8F8 */
0000000000000100000000000000000000000001 1; /* 0007D615B4 */
0000000000000010000000000000000000000000 1; /* 0007DF178F */
0000000000000010010100000000000000000000 1; /* 0007DF1525 */
0000000000000010000000000000001000000000 1; /* 0007D5CEB6 */
0000000000000010000000000000000000000000 1; /* 0007DEAF3B */
0000000000000010110010001000000000000000 1; /* 0007DEB547 */
0000000000000010000000000000000000000000 1; /* 0007E0DA76 */
0000000000000001000000000000000000000000 1; /* 0007E0F0AA */
0000000000000001000000000000000000000000 1; /* 0007E0EFCE */
0000000000000001000000000000000000010000 1; /* 0007DEBF09 */
0000000000000000100000000000000000000000 1; /* 0007DEC102 */
0000000000000000100101000000100000000000 1; /* 0007DEAC69 */
0000000000000000100000000000000000000000 1; /* 0007DEBFF9 */
0000000000000000100000000000000000000001 1; /* 0007DF1BC8 */
0000000000000000110000000000000000000000 1; /* 0007D5EAE1 */
0000000000000000101000000000000000000000 1; /* 0007DEB504 */
0000000000000000100000000000000000001000 1; /* 0007E0EE5F */
0000000000000000100000100000000000000000 1; /* 0007D5EF06 */
0000000000000000100000000000000000000000 1; /* 0007DF1E44 */
0000000000000000100000000000000000010000 1; /* 0007D5E042 */
0000000000000000101010000000000000010000 1; /* 0007D5D9A3 */
0000000000000000010000000000000000000000 1; /* 0007D5E66E */
0000000000000000010000000000000000000000 1; /* 0007D5DEF8 */
0000000000000000011000000000000000000000 1; /* 0007D3BFEA */
0000000000000000010000000000000000000010 1; /* 40007DF17A9 */
0000000000000000010000000010000000000000 1; /* 0007DEAC11 */
0000000000000000010000110000000000000000 1; /* 0007E0D4BD */
0000000000000000010000000000000000000000 1; /* 0007D5D772 */
0000000000000000001000000000000000000000 1; /* 0007D2F441 */
0000000000000000001000000000000000000000 1; /* 0007D5FD67 */
0000000000000000001000000000000000000000 1; /* 0007D5EB07 */
0000000000000000001000000000000000000000 1; /* 0007DEBC6F */
0000000000000000001000000000000000000000 1; /* 0007D2C630 */
0000000000000000001001000000001000000000 1; /* 0007E0F080 */
0000000000000000001000000000000000000000 1; /* 0007DEB4D6 */
0000000000000000001000001000000000000000 1; /* 0007D5D1DB */
0000000000000000001000000000000000000000 1; /* 0007DF117E */
0000000000000000000100000000000000000000 1; /* 0007D39902 */
0000000000000000000010010010110100000000 1; /* 0007DF1C9A */
0000000000000000000011100100100001101001 1; /* 0007DECF0F */
0000000000000000000010001010100000000000 1; /* 0007D5CAEC */
0000000000000000000010000000000000000000 1; /* 0007DEAB88 */
0000000000000000000010000000000000000000 1; /* 0007D5E863 */
0000000000000000000010000000000000000000 1; /* 0007DECB79 */
0000000000000000000010000000000000000000 1; /* 0007DF17A9 */
0000000000000000000010000000100000000000 1; /* 0007D33089 */
0000000000000000000010000000001110000010 1; /* 0007DECC30 */
0000000000000000000010010000000000000000 1; /* 0007DF1D15 */
0000000000000000000010000000000000000000 1; /* 0007DEAC59 */
0000000000000000000010000000000000000001 1; /* 0007D3045A */
0000000000000000000010000000000000000000 1; /* 0007D38ECF */
0000000000000000000001000000000000000000 1; /* 0007D2AE02 */
0000000000000000000001000000000000000000 1; /* 0007D2B0EE */
0000000000000000000001000000100100000000 1; /* 0007D2B06C */
0000000000000000000001000000000000000000 1; /* 0007D2AFFE */
0000000000000000000001000000100000000000 1; /* 0007D4592D */
0000000000000000000001000000000000000000 1; /* 0007D45568 */
0000000000000000000000100000000000000000 1; /* 0007D2ACB2 */
0000000000000000000000100110000100010000 1; /* 0007D2AC57 */
0000000000000000000000100000000000000000 1; /* 0007D46490 */
0000000000000000000000111000000100000001 1; /* 0007D2B074 */
0000000000000000000000010000000000000000 1; /* 0007D2AFFA */
0000000000000000000000010000000000000000 1; /* 0007D2ABA9 */
0000000000000000000000010000000000000000 1; /* 0007D2AF3B */
0000000000000000000000010000000000000000 1; /* 0007D2ADFD */
0000000000000000000000010000000000000000 1; /* 0007D2B013 */
0000000000000000000000001000000000000000 1; /* 0007D2AD29 */
0000000000000000000000000100000000000000 1; /* 0007D2AB8B */
0000000000000000000000000100000001000000 1; /* 0007D2AF9D */
0000000000000000000000000010000000000000 1; /* 0007D2AFEA */
0000000000000000000000000010000000000000 1; /* 0007D2ACE4 */
0000000000000000000000000001000000000000 1; /* 0007DF1C9A */
0000000000000000000000000001001110001000 1; /* 0007D5DF23 */
0000000000000000000000000000100000000000 1; /* 0007D2AE51 */
0000000000000000000000000000100000000000 1; /* 0007D45F47 */
0000000000000000000000000000100000000000 1; /* 0007D2B025 */
0000000000000000000000000000100000000000 1; /* 0007D2AF67 */
0000000000000000000000000000100000000000 1; /* 0007D2AF04 */
0000000000000000000000000000100000000000 1; /* 0007D2B0B8 */
0000000000000000000000000000010001000000 1; /* 0007D2AF5E */
0000000000000000000000000000010000100000 1; /* 0007D2AC50 */
0000000000000000000000000000011100000001 1; /* 0007D4961E */
0000000000000000000000000000010001000101 1; /* 0007D2AC29 */
0000000000000000000000000000010010000000 1; /* 0007D2AF27 */
0000000000000000000000000000011000000000 1; /* 0007D2B0C9 */
0000000000000000000000000000010000000000 1; /* 0007D4645B */
0000000000000000000000000000010000000001 1; /* 0007D2B0C6 */
0000000000000000000000000000010000010000 1; /* 0007D2ABDA */
0000000000000000000000000000010000100000 1; /* 0007D2AF0F */
0000000000000000000000000000001011000000 1; /* 0007D2AD78 */
0000000000000000000000000000001000000000 1; /* 0007D44FF7 */
0000000000000000000000000000001000000000 1; /* 0007D2ABC1 */
0000000000000000000000000000001000000000 1; /* 0007D2AB6B */
0000000000000000000000000000000101001010 1; /* 0007D2AFC8 */
0000000000000000000000000000000100001000 1; /* 0007D2ACE1 */
0000000000000000000000000000000100000000 1; /* 0007D2AD11 */
0000000000000000000000000000000100000000 1; /* 0007D2AC2B */
0000000000000000000000000000000010000000 1; /* 0007D42D35 */
0000000000000000000000000000000010000000 1; /* 0007D2AE09 */
0000000000000000000000000000000011000000 1; /* 0007D4B91A */
0000000000000000000000000000000010000010 1; /* 0007D2AD7C */
0000000000000000000000000000000001000000 1; /* 0007D2AE68 */
0000000000000000000000000000000001000000 1; /* 0007D2AC2D */
0000000000000000000000000000000001000000 1; /* 0007D45A2A */
0000000000000000000000000000000001000000 1; /* 0007D2AEB5 */
0000000000000000000000000000000000100000 1; /* 0007D2AF44 */
0000000000000000000000000000000000010000 1; /* 0007D3E139 */
0000000000000000000000000000000000010100 1; /* 0007D3A688 */
0000000000000000000000000000000000010000 1; /* 0007D38EB8 */
0000000000000000000000000000000000010001 1; /* 0007D5DAEB */
0000000000000000000000000000000000010000 1; /* 0007D5EEC1 */
0000000000000000000000000000000000010001 1; /* 0007D60B2C */
0000000000000000000000000000000000001001 1; /* 0007D2BE63 */
0000000000000000000000000000000000001000 1; /* 0007D2B93D */
0000000000000000000000000000000000001000 1; /* 0007D339F2 */

## Sheet: Matrix San Rafael
ID / DATE	2022-04-06	2022-05-05	2022-05-06	2022-06-04	2022-06-05	2022-07-06	2022-11-18	2023-04-15	2023-04-20		Total recap		2022-04-06
0007D5FC99	1	0	1	0	0	0	0	0	0		2		2022-05-05	29		101000000 1; /* 0007D5FC99 */
0007D5E8C8	1	0	0	0	0	0	0	0	0		1		2022-05-06	1		100000000 1; /* 0007D5E8C8 */
0007E4C965	1	0	0	0	0	1	0	0	0		2		2022-06-04	29		100001000 1; /* 0007E4C965 */
0007D5D7F0	1	1	1	0	1	1	1	1	0		7		2022-06-05	1		111011110 1; /* 0007D5D7F0 */
0007D3DE9B	1	0	0	0	1	0	0	0	0		2		2022-07-06	31		100010000 1; /* 0007D3DE9B */
0007E4C753	1	0	0	0	0	0	0	0	0		1		2022-11-18	135		100000000 1; /* 0007E4C753 */
0007D2B86F	1	0	0	0	0	1	0	0	0		2		2023-04-15	148		100001000 1; /* 0007D2B86F */
0007D3976C	1	0	0	0	0	0	0	0	0		1		2023-04-20	5		100000000 1; /* 0007D3976C */
0007D3927C	1	0	0	0	1	0	0	0	0		2					100010000 1; /* 0007D3927C */
0007D60B72	1	0	0	0	0	0	0	0	0		1					100000000 1; /* 0007D60B72 */
0007D5E05A	1	0	0	0	0	0	0	0	0		1					100000000 1; /* 0007D5E05A */
0007D2D5C4	0	1	0	1	1	1	0	0	0		4					010111000 1; /* 0007D2D5C4 */
0007D5D3A8	0	1	0	1	1	1	0	0	0		4					010111000 1; /* 0007D5D3A8 */
0007D60246	0	1	0	0	0	0	0	0	0		1					010000000 1; /* 0007D60246 */
0007D60AC7	0	1	0	0	1	1	0	0	0		3					010011000 1; /* 0007D60AC7 */
0007D31B91	0	1	0	0	1	0	0	0	0		2					010010000 1; /* 0007D31B91 */
0007D5D933	0	1	1	0	1	0	0	0	0		3					011010000 1; /* 0007D5D933 */
0007D2CB88	0	1	0	0	1	0	0	1	0		3					010010010 1; /* 0007D2CB88 */
0007D5DC8F	0	1	0	0	0	0	0	0	0		1					010000000 1; /* 0007D5DC8F */
0007D5D87F	0	1	0	0	1	0	0	0	1		3					010010001 1; /* 0007D5D87F */
0007D5E7F0	0	1	0	1	1	0	0	0	1		4					010110001 1; /* 0007D5E7F0 */
0007D5F184	0	1	0	0	0	1	0	0	0		2					010001000 1; /* 0007D5F184 */
0007D2B5D2	0	1	0	1	0	0	0	0	0		2					010100000 1; /* 0007D2B5D2 */
0007D2FB82	0	1	0	0	0	0	1	0	0		2					010000100 1; /* 0007D2FB82 */
0007D5DA58	0	0	1	1	0	0	0	0	0		2					001100000 1; /* 0007D5DA58 */
0007D5DD04	0	0	1	0	0	1	1	0	0		3					001001100 1; /* 0007D5DD04 */
0007D5CC0C	0	0	1	0	0	0	0	0	0		1					001000000 1; /* 0007D5CC0C */
0007D35835	0	0	1	0	1	0	0	0	0		2					001010000 1; /* 0007D35835 */
0007D2B501	0	0	1	1	1	0	0	0	0		3					001110000 1; /* 0007D2B501 */
0007D35A43	0	0	1	0	0	0	0	0	0		1					001000000 1; /* 0007D35A43 */
0007D62D66	0	0	1	0	0	0	0	0	0		1					001000000 1; /* 0007D62D66 */
0007D5B7CF	0	0	1	1	1	0	0	0	1		4					001110001 1; /* 0007D5B7CF */
0007D2B4DD	0	0	0	1	1	0	0	0	0		2					000110000 1; /* 0007D2B4DD */
0007D60906	0	0	0	1	1	0	1	0	0		3					000110100 1; /* 0007D60906 */
0007D2F050	0	0	0	1	1	0	1	0	0		3					000110100 1; /* 0007D2F050 */
0007D3324E	0	0	0	1	1	0	0	0	0		2					000110000 1; /* 0007D3324E */
0007D60203	0	0	0	1	1	1	0	0	0		3					000111000 1; /* 0007D60203 */
0007D2C621	0	0	0	1	1	0	0	0	0		2					000110000 1; /* 0007D2C621 */
0007D5FE71	0	0	0	1	0	1	1	0	1		4					000101101 1; /* 0007D5FE71 */
0007D39A55	0	0	0	1	0	0	1	0	0		2					000100100 1; /* 0007D39A55 */
0007D2D327	0	0	0	1	1	1	1	0	0		4					000111100 1; /* 0007D2D327 */
0007D3BD52	0	0	0	1	1	0	0	0	0		2					000110000 1; /* 0007D3BD52 */
0007D39400	0	0	0	1	0	0	0	0	0		1					000100000 1; /* 0007D39400 */
0007D3ADF6	0	0	0	1	1	0	0	0	0		2					000110000 1; /* 0007D3ADF6 */
0007D5B7C7	0	0	0	1	0	0	0	0	0		1					000100000 1; /* 0007D5B7C7 */
0007D5CDDE	0	0	0	1	0	0	1	1	0		3					000100110 1; /* 0007D5CDDE */
0007D3571B	0	0	0	1	1	0	0	0	1		3					000110001 1; /* 0007D3571B */
0007D5B2B6	0	0	0	1	1	0	1	0	1		4					000110101 1; /* 0007D5B2B6 */
0007D5EFBE	0	0	0	1	0	0	0	0	0		1					000100000 1; /* 0007D5EFBE */
0007D4871C	0	0	0	1	1	0	0	0	0		2					000110000 1; /* 0007D4871C */
0007D3A041	0	0	0	1	0	0	0	0	0		1					000100000 1; /* 0007D3A041 */
0007D2C101	0	0	0	1	0	0	0	0	0		1					000100000 1; /* 0007D2C101 */
0007D5E1C4	0	0	0	1	0	0	0	0	0		1					000100000 1; /* 0007D5E1C4 */
0007D39EEF	0	0	0	1	0	0	0	0	0		1					000100000 1; /* 0007D39EEF */
0007D2CE11	0	0	0	1	0	0	0	0	0		1					000100000 1; /* 0007D2CE11 */
0007D5DBE1	0	0	0	1	0	0	1	0	0		2					000100100 1; /* 0007D5DBE1 */
0007D5D4D2	0	0	0	1	0	0	0	0	0		1					000100000 1; /* 0007D5D4D2 */
0007D330A2	0	0	0	1	0	0	0	0	0		1					000100000 1; /* 0007D330A2 */
0007D5FD68	0	0	0	0	1	0	0	0	0		1					000010000 1; /* 0007D5FD68 */
0007D2E6AF	0	0	0	0	1	0	0	0	0		1					000010000 1; /* 0007D2E6AF */
0007D5CE8E	0	0	0	0	1	0	0	0	0		1					000010000 1; /* 0007D5CE8E */
0007D5E41F	0	0	0	0	1	0	0	0	0		1					000010000 1; /* 0007D5E41F */
0007D3DEA8	0	0	0	0	1	0	0	0	0		1					000010000 1; /* 0007D3DEA8 */
0007D5ED3C	0	0	0	0	1	0	0	0	0		1					000010000 1; /* 0007D5ED3C */
0007D5E58D	0	0	0	0	1	0	0	0	0		1					000010000 1; /* 0007D5E58D */
0007D313DE	0	0	0	0	1	1	0	0	0		2					000011000 1; /* 0007D313DE */
0007D60F36	0	0	0	0	1	0	0	0	0		1					000010000 1; /* 0007D60F36 */
0007D5D139	0	0	0	0	1	0	1	0	0		2					000010100 1; /* 0007D5D139 */
0007D32E33	0	0	0	0	1	1	0	0	0		2					000011000 1; /* 0007D32E33 */
0007D61DE8	0	0	0	0	1	0	0	0	0		1					000010000 1; /* 0007D61DE8 */
0007D5D3B2	0	0	0	0	1	0	0	0	0		1					000010000 1; /* 0007D5D3B2 */
0007D5E6A4	0	0	0	0	1	0	0	0	0		1					000010000 1; /* 0007D5E6A4 */
0007D5D57F	0	0	0	0	1	1	0	0	0		2					000011000 1; /* 0007D5D57F */
0007D47D80	0	0	0	0	1	1	0	0	0		2					000011000 1; /* 0007D47D80 */
0007D5DFB0	0	0	0	0	1	0	0	0	0		1					000010000 1; /* 0007D5DFB0 */
0007D5EB7C	0	0	0	0	1	0	0	0	0		1					000010000 1; /* 0007D5EB7C */
0007D5EAE2	0	0	0	0	1	0	0	0	0		1					000010000 1; /* 0007D5EAE2 */
0007D5C4AD	0	0	0	0	1	0	1	0	0		2					000010100 1; /* 0007D5C4AD */
0007D5E436	0	0	0	0	1	0	0	0	0		1					000010000 1; /* 0007D5E436 */
0007D5E582	0	0	0	0	1	1	0	0	0		2					000011000 1; /* 0007D5E582 */
0007D5D3A5	0	0	0	0	1	0	0	0	0		1					000010000 1; /* 0007D5D3A5 */
0007D5E958	0	0	0	0	1	0	0	0	0		1					000010000 1; /* 0007D5E958 */
0007D3AF1A	0	0	0	0	1	0	0	0	0		1					000010000 1; /* 0007D3AF1A */
0007D5E629	0	0	0	0	1	0	0	0	0		1					000010000 1; /* 0007D5E629 */
0007D5DCCD	0	0	0	0	1	1	0	0	0		2					000011000 1; /* 0007D5DCCD */
0007D48713	0	0	0	0	0	1	0	0	0		1					000001000 1; /* 0007D48713 */
0007D5D13F	0	0	0	0	0	1	0	0	0		1					000001000 1; /* 0007D5D13F */
0007D5FB01	0	0	0	0	0	1	0	0	0		1					000001000 1; /* 0007D5FB01 */
0007D61333	0	0	0	0	0	1	0	0	0		1					000001000 1; /* 0007D61333 */
0007D39D53	0	0	0	0	0	1	0	0	0		1					000001000 1; /* 0007D39D53 */
0007D5CD6A	0	0	0	0	0	1	0	0	0		1					000001000 1; /* 0007D5CD6A */
0007D35B1F	0	0	0	0	0	1	0	0	0		1					000001000 1; /* 0007D35B1F */
0007D39F08	0	0	0	0	0	1	0	0	0		1					000001000 1; /* 0007D39F08 */
0007E98035	0	0	0	0	0	1	0	0	0		1					000001000 1; /* 0007E98035 */
0007D6217E	0	0	0	0	0	1	0	0	0		1					000001000 1; /* 0007D6217E */
0007D5F795	0	0	0	0	0	1	0	0	0		1					000001000 1; /* 0007D5F795 */
0007D32B6D	0	0	0	0	0	1	0	1	0		2					000001010 1; /* 0007D32B6D */
0007D5E531	0	0	0	0	0	1	1	1	0		3					000001110 1; /* 0007D5E531 */
0007D604DB	0	0	0	0	0	1	0	0	0		1					000001000 1; /* 0007D604DB */
0007D5FA0D	0	0	0	0	0	1	1	0	0		2					000001100 1; /* 0007D5FA0D */
0007E0DD2C	0	0	0	0	0	1	0	0	0		1					000001000 1; /* 0007E0DD2C */
0007D2C3B0	0	0	0	0	0	1	0	0	0		1					000001000 1; /* 0007D2C3B0 */
0007D2C612	0	0	0	0	0	1	0	0	0		1					000001000 1; /* 0007D2C612 */
0007DEB394	0	0	0	0	0	1	0	0	0		1					000001000 1; /* 0007DEB394 */
0007D35AE4	0	0	0	0	0	1	0	0	0		1					000001000 1; /* 0007D35AE4 */
0007D62890	0	0	0	0	0	1	0	0	0		1					000001000 1; /* 0007D62890 */
0007DEB471	0	0	0	0	0	1	0	0	0		1					000001000 1; /* 0007DEB471 */
0007DF1DE0	0	0	0	0	0	1	0	0	0		1					000001000 1; /* 0007DF1DE0 */
0007D2BFAB	0	0	0	0	0	1	0	0	0		1					000001000 1; /* 0007D2BFAB */
0007D2ABA4	0	0	0	0	0	1	1	0	0		2					000001100 1; /* 0007D2ABA4 */
0007DEB2FA	0	0	0	0	0	1	0	0	0		1					000001000 1; /* 0007DEB2FA */
0007DECD2C	0	0	0	0	0	1	1	0	0		2					000001100 1; /* 0007DECD2C */
0007E0D1FC	0	0	0	0	0	1	0	0	0		1					000001000 1; /* 0007E0D1FC */
0007DEBC8D	0	0	0	0	0	1	0	0	0		1					000001000 1; /* 0007DEBC8D */
0007D5D3BC	0	0	0	0	0	1	0	0	0		1					000001000 1; /* 0007D5D3BC */
0007E53983	0	0	0	0	0	1	0	0	0		1					000001000 1; /* 0007E53983 */
0007D2AB61	0	0	0	0	0	0	1	0	0		1					000000100 1; /* 0007D2AB61 */
0007D2ACAA	0	0	0	0	0	0	1	0	0		1					000000100 1; /* 0007D2ACAA */
0007D5E552	0	0	0	0	0	0	1	0	0		1					000000100 1; /* 0007D5E552 */
0007D2AD2A	0	0	0	0	0	0	1	0	0		1					000000100 1; /* 0007D2AD2A */
0007D2AEA0	0	0	0	0	0	0	1	0	0		1					000000100 1; /* 0007D2AEA0 */
0007D2AC76	0	0	0	0	0	0	1	0	0		1					000000100 1; /* 0007D2AC76 */
0007D2AD71	0	0	0	0	0	0	1	0	0		1					000000100 1; /* 0007D2AD71 */
0007D2AC41	0	0	0	0	0	0	1	0	0		1					000000100 1; /* 0007D2AC41 */
0007D2AFA4	0	0	0	0	0	0	1	1	1		3					000000111 1; /* 0007D2AFA4 */
0007D2ABB4	0	0	0	0	0	0	1	0	0		1					000000100 1; /* 0007D2ABB4 */
0007D2AD3C	0	0	0	0	0	0	1	0	1		2					000000101 1; /* 0007D2AD3C */
0007D41B4B	0	0	0	0	0	0	1	0	0		1					000000100 1; /* 0007D41B4B */
0007D2AFF3	0	0	0	0	0	0	1	0	0		1					000000100 1; /* 0007D2AFF3 */
0007D2AD0A	0	0	0	0	0	0	1	0	1		2					000000101 1; /* 0007D2AD0A */
0007D2B0D8	0	0	0	0	0	0	1	0	0		1					000000100 1; /* 0007D2B0D8 */
0007D2B09C	0	0	0	0	0	0	1	0	0		1					000000100 1; /* 0007D2B09C */
0007D2B01B	0	0	0	0	0	0	1	0	0		1					000000100 1; /* 0007D2B01B */
0007D2AC09	0	0	0	0	0	0	1	0	0		1					000000100 1; /* 0007D2AC09 */
0007D2AC53	0	0	0	0	0	0	1	0	0		1					000000100 1; /* 0007D2AC53 */
0007D2AD24	0	0	0	0	0	0	1	0	1		2					000000101 1; /* 0007D2AD24 */
0007D2B02B	0	0	0	0	0	0	0	1	0		1					000000010 1; /* 0007D2B02B */
0007D2AD21	0	0	0	0	0	0	0	1	0		1					000000010 1; /* 0007D2AD21 */
0007D2AC51	0	0	0	0	0	0	0	1	0		1					000000010 1; /* 0007D2AC51 */
0007D2AF7B	0	0	0	0	0	0	0	1	0		1					000000010 1; /* 0007D2AF7B */
0007D2AF33	0	0	0	0	0	0	0	0	1		1					000000001 1; /* 0007D2AF33 */
0007D2B01E	0	0	0	0	0	0	0	0	1		1					000000001 1; /* 0007D2B01E */
0007D2AF6A	0	0	0	0	0	0	0	0	1		1					000000001 1; /* 0007D2AF6A */
0007D2AF4A	0	0	0	0	0	0	0	0	1		1					000000001 1; /* 0007D2AF4A */

## Sheet: San_Rafael.inp
101000000 1; /* 0007D5FC99 */
100000000 1; /* 0007D5E8C8 */
100001000 1; /* 0007E4C965 */
111011110 1; /* 0007D5D7F0 */
100010000 1; /* 0007D3DE9B */
100000000 1; /* 0007E4C753 */
100001000 1; /* 0007D2B86F */
100000000 1; /* 0007D3976C */
100010000 1; /* 0007D3927C */
100000000 1; /* 0007D60B72 */
100000000 1; /* 0007D5E05A */
010111000 1; /* 0007D2D5C4 */
010111000 1; /* 0007D5D3A8 */
010000000 1; /* 0007D60246 */
010011000 1; /* 0007D60AC7 */
010010000 1; /* 0007D31B91 */
011010000 1; /* 0007D5D933 */
010010010 1; /* 0007D2CB88 */
010000000 1; /* 0007D5DC8F */
010010001 1; /* 0007D5D87F */
010110001 1; /* 0007D5E7F0 */
010001000 1; /* 0007D5F184 */
010100000 1; /* 0007D2B5D2 */
010000100 1; /* 0007D2FB82 */
001100000 1; /* 0007D5DA58 */
001001100 1; /* 0007D5DD04 */
001000000 1; /* 0007D5CC0C */
001010000 1; /* 0007D35835 */
001110000 1; /* 0007D2B501 */
001000000 1; /* 0007D35A43 */
001000000 1; /* 0007D62D66 */
001110001 1; /* 0007D5B7CF */
000110000 1; /* 0007D2B4DD */
000110100 1; /* 0007D60906 */
000110100 1; /* 0007D2F050 */
000110000 1; /* 0007D3324E */
000111000 1; /* 0007D60203 */
000110000 1; /* 0007D2C621 */
000101101 1; /* 0007D5FE71 */
000100100 1; /* 0007D39A55 */
000111100 1; /* 0007D2D327 */
000110000 1; /* 0007D3BD52 */
000100000 1; /* 0007D39400 */
000110000 1; /* 0007D3ADF6 */
000100000 1; /* 0007D5B7C7 */
000100110 1; /* 0007D5CDDE */
000110001 1; /* 0007D3571B */
000110101 1; /* 0007D5B2B6 */
000100000 1; /* 0007D5EFBE */
000110000 1; /* 0007D4871C */
000100000 1; /* 0007D3A041 */
000100000 1; /* 0007D2C101 */
000100000 1; /* 0007D5E1C4 */
000100000 1; /* 0007D39EEF */
000100000 1; /* 0007D2CE11 */
000100100 1; /* 0007D5DBE1 */
000100000 1; /* 0007D5D4D2 */
000100000 1; /* 0007D330A2 */
000010000 1; /* 0007D5FD68 */
000010000 1; /* 0007D2E6AF */
000010000 1; /* 0007D5CE8E */
000010000 1; /* 0007D5E41F */
000010000 1; /* 0007D3DEA8 */
000010000 1; /* 0007D5ED3C */
000010000 1; /* 0007D5E58D */
000011000 1; /* 0007D313DE */
000010000 1; /* 0007D60F36 */
000010100 1; /* 0007D5D139 */
000011000 1; /* 0007D32E33 */
000010000 1; /* 0007D61DE8 */
000010000 1; /* 0007D5D3B2 */
000010000 1; /* 0007D5E6A4 */
000011000 1; /* 0007D5D57F */
000011000 1; /* 0007D47D80 */
000010000 1; /* 0007D5DFB0 */
000010000 1; /* 0007D5EB7C */
000010000 1; /* 0007D5EAE2 */
000010100 1; /* 0007D5C4AD */
000010000 1; /* 0007D5E436 */
000011000 1; /* 0007D5E582 */
000010000 1; /* 0007D5D3A5 */
000010000 1; /* 0007D5E958 */
000010000 1; /* 0007D3AF1A */
000010000 1; /* 0007D5E629 */
000011000 1; /* 0007D5DCCD */
000001000 1; /* 0007D48713 */
000001000 1; /* 0007D5D13F */
000001000 1; /* 0007D5FB01 */
000001000 1; /* 0007D61333 */
000001000 1; /* 0007D39D53 */
000001000 1; /* 0007D5CD6A */
000001000 1; /* 0007D35B1F */
000001000 1; /* 0007D39F08 */
000001000 1; /* 0007E98035 */
000001000 1; /* 0007D6217E */
000001000 1; /* 0007D5F795 */
000001010 1; /* 0007D32B6D */
000001110 1; /* 0007D5E531 */
000001000 1; /* 0007D604DB */
000001100 1; /* 0007D5FA0D */
000001000 1; /* 0007E0DD2C */
000001000 1; /* 0007D2C3B0 */
000001000 1; /* 0007D2C612 */
000001000 1; /* 0007DEB394 */
000001000 1; /* 0007D35AE4 */
000001000 1; /* 0007D62890 */
000001000 1; /* 0007DEB471 */
000001000 1; /* 0007DF1DE0 */
000001000 1; /* 0007D2BFAB */
000001100 1; /* 0007D2ABA4 */
000001000 1; /* 0007DEB2FA */
000001100 1; /* 0007DECD2C */
000001000 1; /* 0007E0D1FC */
000001000 1; /* 0007DEBC8D */
000001000 1; /* 0007D5D3BC */
000001000 1; /* 0007E53983 */
000000100 1; /* 0007D2AB61 */
000000100 1; /* 0007D2ACAA */
000000100 1; /* 0007D5E552 */
000000100 1; /* 0007D2AD2A */
000000100 1; /* 0007D2AEA0 */
000000100 1; /* 0007D2AC76 */
000000100 1; /* 0007D2AD71 */
000000100 1; /* 0007D2AC41 */
000000111 1; /* 0007D2AFA4 */
000000100 1; /* 0007D2ABB4 */
000000101 1; /* 0007D2AD3C */
000000100 1; /* 0007D41B4B */
000000100 1; /* 0007D2AFF3 */
000000101 1; /* 0007D2AD0A */
000000100 1; /* 0007D2B0D8 */
000000100 1; /* 0007D2B09C */
000000100 1; /* 0007D2B01B */
000000100 1; /* 0007D2AC09 */
000000100 1; /* 0007D2AC53 */
000000101 1; /* 0007D2AD24 */
000000010 1; /* 0007D2B02B */
000000010 1; /* 0007D2AD21 */
000000010 1; /* 0007D2AC51 */
000000010 1; /* 0007D2AF7B */
000000001 1; /* 0007D2AF33 */
000000001 1; /* 0007D2B01E */
000000001 1; /* 0007D2AF6A */
000000001 1; /* 0007D2AF4A */
